# Supplementary material
Source: publisher site journal article supplement (https://www.dovepress.com/get_supplementary_file.php?f=398314.xlsx)
Supplement: Supplementary file 1 [file get_supplementary_file.php]

## Sheet: Sheet1
number	Sex	Age	ASA	BMI	Smoking history	History of alcoholism	Surgical history	Diabetes	Hypertension	CHD	COPD	Surgery approach	Anesthesia method	Surgery time	Bleeding volume	ICU stay	Pulmonary infection	Wound infection	Stroke	TIA	Anemia	Preoperative ALB	Postoperative ALB	Surgery Type	Body temperature	BIS	Blood transfusion	Sleep disorders	Fever	Delirium	group
1	Male	≥65	＜3	≥25kg/m2	Yes	No	Yes	Yes	No	Yes	No	Open surgery	Non-general anesthesia	≥270min	≥100ml	Yes	No	Yes	No	Yes	Yes	＜30g/L	≥30g/L	Orthopedic surgery	≥36℃	＜40	No	Yes	No	Yes	Internal validation set
2	Female	＜65	≥3	＜25kg/m2	No	No	No	Yes	Yes	Yes	No	Open surgery	Non-general anesthesia	≥270min	≥100ml	Yes	Yes	Yes	No	Yes	Yes	＜30g/L	＜30g/L	Gastrointestinal surgery	≥36℃	＜40	Yes	Yes	Yes	Yes	Internal validation set
3	Female	≥65	≥3	＜25kg/m2	Yes	Yes	Yes	Yes	No	No	Yes	Laparoscopic surgery	Non-general anesthesia	≥270min	≥100ml	No	No	No	No	No	No	＜30g/L	≥30g/L	Gastrointestinal surgery	≥36℃	＜40	Yes	Yes	Yes	Yes	Internal validation set
4	Male	≥65	＜3	≥25kg/m2	Yes	No	Yes	Yes	Yes	No	Yes	Open surgery	Non-general anesthesia	＜270min	＜100ml	Yes	Yes	No	Yes	No	Yes	＜30g/L	＜30g/L	Gastrointestinal surgery	＜36℃	＜40	No	Yes	Yes	Yes	Internal validation set
5	Female	≥65	＜3	＜25kg/m2	Yes	Yes	No	Yes	Yes	Yes	Yes	Laparoscopic surgery	General anesthesia	≥270min	＜100ml	Yes	Yes	No	Yes	No	Yes	≥30g/L	≥30g/L	Gastrointestinal surgery	≥36℃	＜40	Yes	No	Yes	Yes	Internal validation set
6	Female	≥65	＜3	＜25kg/m2	Yes	Yes	Yes	No	Yes	Yes	Yes	Open surgery	General anesthesia	≥270min	≥100ml	Yes	Yes	Yes	Yes	Yes	No	＜30g/L	≥30g/L	Orthopedic surgery	≥36℃	≥40	Yes	Yes	Yes	Yes	Internal validation set
7	Female	≥65	≥3	＜25kg/m2	Yes	Yes	No	Yes	Yes	Yes	Yes	Open surgery	Non-general anesthesia	≥270min	≥100ml	No	No	Yes	No	Yes	Yes	≥30g/L	≥30g/L	Gastrointestinal surgery	＜36℃	＜40	No	No	No	Yes	Internal validation set
8	Male	≥65	＜3	＜25kg/m2	Yes	No	Yes	No	Yes	No	Yes	Open surgery	Non-general anesthesia	≥270min	≥100ml	Yes	Yes	No	No	Yes	No	≥30g/L	＜30g/L	Cardiovascular surgery	≥36℃	＜40	Yes	No	Yes	Yes	Internal validation set
9	Female	≥65	≥3	＜25kg/m2	Yes	No	No	Yes	Yes	Yes	No	Laparoscopic surgery	General anesthesia	≥270min	＜100ml	Yes	No	No	Yes	No	No	≥30g/L	＜30g/L	Other surgery	＜36℃	≥40	No	Yes	No	Yes	Internal validation set
10	Female	≥65	＜3	≥25kg/m2	No	Yes	Yes	Yes	Yes	Yes	No	Laparoscopic surgery	General anesthesia	≥270min	≥100ml	No	No	Yes	No	Yes	No	≥30g/L	≥30g/L	Orthopedic surgery	≥36℃	＜40	Yes	Yes	No	Yes	Internal validation set
11	Female	≥65	＜3	＜25kg/m2	Yes	Yes	Yes	Yes	Yes	No	No	Open surgery	Non-general anesthesia	≥270min	≥100ml	Yes	Yes	No	No	No	No	＜30g/L	＜30g/L	Gastrointestinal surgery	≥36℃	≥40	Yes	Yes	Yes	Yes	Internal validation set
12	Female	≥65	＜3	＜25kg/m2	No	Yes	No	No	Yes	No	Yes	Laparoscopic surgery	Non-general anesthesia	≥270min	≥100ml	No	Yes	No	Yes	No	No	＜30g/L	＜30g/L	Other surgery	≥36℃	≥40	Yes	No	Yes	Yes	Internal validation set
13	Female	≥65	≥3	≥25kg/m2	No	No	No	No	No	Yes	No	Open surgery	General anesthesia	＜270min	＜100ml	Yes	Yes	No	Yes	Yes	Yes	≥30g/L	＜30g/L	Cardiovascular surgery	＜36℃	＜40	Yes	No	No	Yes	Internal validation set
14	Male	＜65	＜3	＜25kg/m2	Yes	Yes	No	Yes	No	Yes	Yes	Laparoscopic surgery	General anesthesia	≥270min	＜100ml	Yes	Yes	No	Yes	Yes	No	＜30g/L	＜30g/L	Other surgery	＜36℃	＜40	No	No	No	Yes	Internal validation set
15	Male	＜65	＜3	＜25kg/m2	Yes	Yes	No	Yes	Yes	No	No	Open surgery	Non-general anesthesia	≥270min	≥100ml	Yes	Yes	No	No	No	Yes	≥30g/L	≥30g/L	Gastrointestinal surgery	＜36℃	＜40	Yes	No	Yes	Yes	Internal validation set
16	Female	≥65	＜3	≥25kg/m2	Yes	Yes	No	Yes	Yes	No	Yes	Laparoscopic surgery	General anesthesia	≥270min	＜100ml	Yes	No	No	No	Yes	No	＜30g/L	≥30g/L	Gastrointestinal surgery	＜36℃	≥40	No	Yes	No	Yes	Internal validation set
17	Male	≥65	≥3	≥25kg/m2	Yes	No	No	No	No	Yes	No	Open surgery	Non-general anesthesia	≥270min	＜100ml	No	No	No	No	Yes	No	＜30g/L	≥30g/L	Other surgery	≥36℃	≥40	No	Yes	Yes	Yes	Internal validation set
18	Male	≥65	＜3	＜25kg/m2	Yes	Yes	Yes	Yes	Yes	No	Yes	Laparoscopic surgery	Non-general anesthesia	≥270min	≥100ml	Yes	No	No	Yes	Yes	Yes	＜30g/L	≥30g/L	Urological surgery	≥36℃	＜40	No	No	No	Yes	Internal validation set
19	Female	≥65	＜3	＜25kg/m2	Yes	Yes	Yes	Yes	Yes	No	Yes	Laparoscopic surgery	Non-general anesthesia	≥270min	＜100ml	Yes	Yes	No	No	Yes	No	≥30g/L	≥30g/L	Orthopedic surgery	＜36℃	≥40	Yes	Yes	No	Yes	Internal validation set
20	Female	≥65	≥3	≥25kg/m2	Yes	Yes	No	Yes	Yes	No	Yes	Open surgery	Non-general anesthesia	≥270min	≥100ml	Yes	Yes	No	No	Yes	Yes	≥30g/L	＜30g/L	Urological surgery	＜36℃	＜40	Yes	No	No	Yes	Internal validation set
21	Male	≥65	≥3	＜25kg/m2	No	Yes	No	No	Yes	No	Yes	Open surgery	Non-general anesthesia	≥270min	＜100ml	Yes	No	Yes	No	No	Yes	＜30g/L	＜30g/L	Orthopedic surgery	＜36℃	＜40	Yes	Yes	No	Yes	Internal validation set
22	Female	≥65	＜3	＜25kg/m2	Yes	No	Yes	No	No	No	No	Laparoscopic surgery	Non-general anesthesia	≥270min	＜100ml	Yes	No	Yes	Yes	Yes	No	＜30g/L	≥30g/L	Gastrointestinal surgery	≥36℃	≥40	No	Yes	Yes	Yes	Internal validation set
23	Male	≥65	＜3	≥25kg/m2	Yes	Yes	Yes	Yes	Yes	Yes	Yes	Laparoscopic surgery	General anesthesia	≥270min	≥100ml	Yes	Yes	No	No	No	No	＜30g/L	≥30g/L	Gastrointestinal surgery	≥36℃	≥40	No	Yes	Yes	Yes	Internal validation set
24	Female	＜65	＜3	＜25kg/m2	No	Yes	Yes	No	No	Yes	Yes	Laparoscopic surgery	Non-general anesthesia	≥270min	≥100ml	Yes	No	No	Yes	No	Yes	≥30g/L	≥30g/L	Gastrointestinal surgery	＜36℃	＜40	No	No	No	Yes	Internal validation set
25	Female	＜65	＜3	＜25kg/m2	Yes	Yes	No	No	No	No	Yes	Open surgery	General anesthesia	≥270min	＜100ml	Yes	No	Yes	No	Yes	No	＜30g/L	≥30g/L	Other surgery	≥36℃	＜40	No	Yes	No	Yes	Internal validation set
26	Female	≥65	≥3	≥25kg/m2	Yes	Yes	Yes	Yes	Yes	Yes	Yes	Laparoscopic surgery	Non-general anesthesia	≥270min	＜100ml	Yes	No	No	No	Yes	Yes	≥30g/L	≥30g/L	Gastrointestinal surgery	＜36℃	＜40	Yes	Yes	No	Yes	Internal validation set
27	Female	≥65	＜3	＜25kg/m2	No	Yes	Yes	No	Yes	No	Yes	Laparoscopic surgery	General anesthesia	≥270min	≥100ml	Yes	No	No	Yes	Yes	Yes	＜30g/L	≥30g/L	Cardiovascular surgery	＜36℃	＜40	Yes	Yes	No	Yes	Internal validation set
28	Male	≥65	＜3	＜25kg/m2	No	No	Yes	Yes	No	No	Yes	Laparoscopic surgery	Non-general anesthesia	≥270min	＜100ml	Yes	No	Yes	Yes	Yes	No	≥30g/L	＜30g/L	Other surgery	＜36℃	＜40	Yes	Yes	Yes	Yes	Internal validation set
29	Female	≥65	≥3	≥25kg/m2	Yes	No	No	No	Yes	No	Yes	Open surgery	Non-general anesthesia	≥270min	＜100ml	Yes	No	Yes	No	Yes	No	≥30g/L	≥30g/L	Cardiovascular surgery	≥36℃	≥40	No	Yes	No	Yes	Internal validation set
30	Female	≥65	≥3	≥25kg/m2	Yes	Yes	No	No	Yes	Yes	No	Open surgery	Non-general anesthesia	≥270min	≥100ml	No	Yes	No	No	No	Yes	＜30g/L	≥30g/L	Orthopedic surgery	＜36℃	＜40	Yes	No	Yes	Yes	Internal validation set
31	Female	≥65	≥3	＜25kg/m2	Yes	Yes	Yes	Yes	No	Yes	Yes	Laparoscopic surgery	Non-general anesthesia	≥270min	≥100ml	Yes	Yes	No	No	Yes	Yes	＜30g/L	≥30g/L	Gastrointestinal surgery	≥36℃	≥40	No	Yes	Yes	Yes	Internal validation set
32	Male	≥65	≥3	＜25kg/m2	No	No	Yes	Yes	Yes	Yes	No	Laparoscopic surgery	Non-general anesthesia	≥270min	＜100ml	Yes	No	No	No	No	Yes	＜30g/L	≥30g/L	Urological surgery	＜36℃	＜40	Yes	No	No	Yes	Internal validation set
33	Female	＜65	＜3	＜25kg/m2	No	Yes	No	No	Yes	Yes	No	Open surgery	Non-general anesthesia	≥270min	＜100ml	Yes	No	No	No	No	Yes	≥30g/L	≥30g/L	Other surgery	＜36℃	＜40	No	No	Yes	Yes	Internal validation set
34	Male	≥65	＜3	＜25kg/m2	Yes	Yes	No	No	Yes	No	No	Open surgery	Non-general anesthesia	≥270min	＜100ml	Yes	Yes	No	No	Yes	No	＜30g/L	≥30g/L	Orthopedic surgery	＜36℃	＜40	No	Yes	No	Yes	Internal validation set
35	Female	≥65	≥3	＜25kg/m2	Yes	Yes	Yes	Yes	Yes	No	No	Laparoscopic surgery	General anesthesia	≥270min	≥100ml	Yes	No	No	Yes	Yes	No	＜30g/L	≥30g/L	Other surgery	≥36℃	≥40	No	No	Yes	Yes	Internal validation set
36	Female	≥65	＜3	≥25kg/m2	Yes	No	No	No	Yes	Yes	Yes	Open surgery	General anesthesia	＜270min	≥100ml	Yes	No	No	Yes	No	No	＜30g/L	≥30g/L	Cardiovascular surgery	＜36℃	＜40	Yes	No	Yes	Yes	Internal validation set
37	Male	≥65	≥3	≥25kg/m2	Yes	No	No	No	Yes	No	No	Open surgery	General anesthesia	≥270min	＜100ml	Yes	Yes	No	No	No	No	≥30g/L	＜30g/L	Cardiovascular surgery	＜36℃	≥40	Yes	No	Yes	Yes	Internal validation set
38	Male	≥65	≥3	≥25kg/m2	Yes	Yes	Yes	Yes	Yes	No	Yes	Laparoscopic surgery	Non-general anesthesia	≥270min	＜100ml	No	Yes	Yes	No	Yes	No	≥30g/L	＜30g/L	Urological surgery	≥36℃	≥40	No	Yes	Yes	Yes	Internal validation set
39	Male	≥65	＜3	＜25kg/m2	Yes	Yes	No	Yes	Yes	No	No	Laparoscopic surgery	General anesthesia	≥270min	≥100ml	Yes	No	Yes	Yes	Yes	Yes	≥30g/L	＜30g/L	Gastrointestinal surgery	＜36℃	≥40	No	Yes	Yes	Yes	Internal validation set
40	Male	≥65	＜3	＜25kg/m2	No	Yes	Yes	No	Yes	Yes	Yes	Open surgery	Non-general anesthesia	≥270min	＜100ml	Yes	No	Yes	No	No	No	＜30g/L	≥30g/L	Orthopedic surgery	≥36℃	＜40	No	Yes	No	Yes	Internal validation set
41	Female	≥65	≥3	≥25kg/m2	No	Yes	No	No	No	Yes	No	Laparoscopic surgery	Non-general anesthesia	≥270min	＜100ml	Yes	No	Yes	No	No	Yes	≥30g/L	≥30g/L	Gastrointestinal surgery	≥36℃	＜40	No	Yes	Yes	Yes	Internal validation set
42	Female	＜65	＜3	＜25kg/m2	Yes	Yes	No	No	No	No	Yes	Open surgery	Non-general anesthesia	≥270min	＜100ml	Yes	Yes	No	No	Yes	No	＜30g/L	≥30g/L	Gastrointestinal surgery	≥36℃	＜40	Yes	No	Yes	Yes	Internal validation set
43	Female	≥65	＜3	≥25kg/m2	Yes	Yes	No	Yes	Yes	No	Yes	Laparoscopic surgery	Non-general anesthesia	≥270min	＜100ml	Yes	Yes	Yes	No	No	No	≥30g/L	＜30g/L	Gastrointestinal surgery	＜36℃	＜40	Yes	No	Yes	Yes	Internal validation set
44	Male	≥65	＜3	≥25kg/m2	No	Yes	No	Yes	Yes	Yes	Yes	Laparoscopic surgery	General anesthesia	＜270min	＜100ml	No	No	Yes	No	No	Yes	＜30g/L	＜30g/L	Gastrointestinal surgery	＜36℃	＜40	No	No	No	Yes	Internal validation set
45	Female	≥65	＜3	＜25kg/m2	Yes	No	Yes	No	Yes	No	Yes	Open surgery	Non-general anesthesia	≥270min	＜100ml	No	No	Yes	No	Yes	Yes	＜30g/L	＜30g/L	Urological surgery	＜36℃	＜40	No	Yes	No	Yes	Internal validation set
46	Male	≥65	≥3	＜25kg/m2	Yes	No	No	No	Yes	No	No	Open surgery	General anesthesia	≥270min	≥100ml	Yes	Yes	No	Yes	Yes	No	＜30g/L	≥30g/L	Other surgery	≥36℃	≥40	Yes	Yes	No	Yes	Internal validation set
47	Female	≥65	＜3	≥25kg/m2	Yes	Yes	Yes	Yes	No	No	Yes	Laparoscopic surgery	General anesthesia	≥270min	≥100ml	Yes	No	Yes	Yes	No	No	≥30g/L	＜30g/L	Other surgery	＜36℃	＜40	Yes	Yes	Yes	Yes	Internal validation set
48	Female	≥65	＜3	＜25kg/m2	Yes	Yes	No	No	Yes	No	Yes	Open surgery	Non-general anesthesia	≥270min	＜100ml	Yes	No	No	No	No	No	≥30g/L	＜30g/L	Other surgery	＜36℃	≥40	No	Yes	Yes	Yes	Internal validation set
49	Male	≥65	≥3	≥25kg/m2	Yes	Yes	No	No	Yes	No	Yes	Open surgery	General anesthesia	≥270min	＜100ml	No	No	No	No	No	No	≥30g/L	＜30g/L	Orthopedic surgery	＜36℃	≥40	Yes	Yes	No	Yes	Internal validation set
50	Male	≥65	≥3	≥25kg/m2	Yes	Yes	No	No	Yes	Yes	Yes	Laparoscopic surgery	General anesthesia	≥270min	≥100ml	Yes	No	No	Yes	Yes	Yes	≥30g/L	＜30g/L	Gastrointestinal surgery	≥36℃	≥40	No	Yes	No	Yes	Internal validation set
51	Male	≥65	≥3	≥25kg/m2	Yes	No	No	No	Yes	Yes	Yes	Open surgery	Non-general anesthesia	≥270min	＜100ml	Yes	No	No	No	Yes	No	≥30g/L	≥30g/L	Gastrointestinal surgery	＜36℃	＜40	Yes	No	Yes	Yes	Internal validation set
52	Female	≥65	≥3	＜25kg/m2	No	No	Yes	No	Yes	No	Yes	Open surgery	General anesthesia	≥270min	＜100ml	Yes	Yes	No	No	No	No	≥30g/L	≥30g/L	Orthopedic surgery	＜36℃	＜40	No	Yes	No	Yes	Internal validation set
53	Male	≥65	＜3	＜25kg/m2	No	Yes	No	No	Yes	Yes	Yes	Open surgery	General anesthesia	＜270min	≥100ml	No	Yes	No	Yes	No	No	＜30g/L	＜30g/L	Cardiovascular surgery	≥36℃	＜40	Yes	Yes	Yes	Yes	Internal validation set
54	Male	≥65	＜3	≥25kg/m2	Yes	Yes	No	Yes	Yes	Yes	No	Laparoscopic surgery	Non-general anesthesia	≥270min	≥100ml	Yes	No	No	No	No	No	≥30g/L	＜30g/L	Other surgery	≥36℃	＜40	Yes	No	Yes	Yes	Internal validation set
55	Male	＜65	＜3	＜25kg/m2	Yes	Yes	No	Yes	Yes	Yes	Yes	Laparoscopic surgery	General anesthesia	≥270min	＜100ml	Yes	No	Yes	No	No	Yes	＜30g/L	≥30g/L	Gastrointestinal surgery	≥36℃	≥40	No	No	Yes	Yes	Internal validation set
56	Female	≥65	＜3	≥25kg/m2	Yes	Yes	Yes	No	Yes	No	No	Open surgery	Non-general anesthesia	≥270min	＜100ml	No	Yes	Yes	No	Yes	Yes	≥30g/L	＜30g/L	Other surgery	＜36℃	＜40	Yes	No	Yes	Yes	Internal validation set
57	Male	≥65	＜3	＜25kg/m2	Yes	No	No	No	No	No	No	Open surgery	General anesthesia	≥270min	＜100ml	No	No	No	No	Yes	Yes	≥30g/L	≥30g/L	Other surgery	≥36℃	≥40	No	No	No	Yes	Internal validation set
58	Female	≥65	＜3	＜25kg/m2	Yes	Yes	Yes	Yes	No	Yes	No	Laparoscopic surgery	Non-general anesthesia	≥270min	≥100ml	Yes	No	Yes	Yes	No	No	＜30g/L	≥30g/L	Orthopedic surgery	＜36℃	≥40	No	No	No	Yes	Internal validation set
59	Female	≥65	＜3	≥25kg/m2	Yes	Yes	No	No	Yes	No	Yes	Open surgery	General anesthesia	≥270min	≥100ml	No	Yes	No	Yes	No	Yes	≥30g/L	≥30g/L	Orthopedic surgery	＜36℃	＜40	No	No	No	Yes	Internal validation set
60	Male	≥65	＜3	≥25kg/m2	Yes	Yes	No	No	Yes	Yes	No	Open surgery	Non-general anesthesia	＜270min	＜100ml	Yes	Yes	No	No	No	No	≥30g/L	≥30g/L	Cardiovascular surgery	＜36℃	≥40	Yes	No	Yes	Yes	Internal validation set
61	Female	≥65	＜3	＜25kg/m2	No	No	Yes	Yes	Yes	No	Yes	Laparoscopic surgery	General anesthesia	≥270min	＜100ml	Yes	No	Yes	No	No	Yes	＜30g/L	≥30g/L	Orthopedic surgery	≥36℃	≥40	No	No	Yes	Yes	Internal validation set
62	Female	≥65	＜3	＜25kg/m2	No	Yes	Yes	Yes	Yes	No	Yes	Laparoscopic surgery	General anesthesia	≥270min	≥100ml	No	No	No	Yes	Yes	No	＜30g/L	≥30g/L	Orthopedic surgery	≥36℃	≥40	No	Yes	Yes	Yes	Internal validation set
63	Male	≥65	≥3	≥25kg/m2	Yes	Yes	Yes	No	Yes	Yes	Yes	Open surgery	Non-general anesthesia	≥270min	＜100ml	Yes	No	No	No	Yes	Yes	≥30g/L	≥30g/L	Gastrointestinal surgery	≥36℃	＜40	Yes	Yes	Yes	Yes	Internal validation set
64	Female	≥65	≥3	＜25kg/m2	No	Yes	Yes	No	Yes	Yes	Yes	Open surgery	General anesthesia	≥270min	＜100ml	Yes	Yes	Yes	No	Yes	No	≥30g/L	＜30g/L	Other surgery	≥36℃	＜40	Yes	No	Yes	Yes	Internal validation set
65	Male	≥65	＜3	＜25kg/m2	Yes	Yes	No	No	Yes	Yes	Yes	Open surgery	General anesthesia	≥270min	＜100ml	Yes	Yes	No	No	No	No	≥30g/L	＜30g/L	Gastrointestinal surgery	＜36℃	≥40	No	Yes	No	Yes	Internal validation set
66	Male	≥65	＜3	≥25kg/m2	Yes	No	No	Yes	No	Yes	Yes	Laparoscopic surgery	Non-general anesthesia	≥270min	＜100ml	Yes	No	No	No	No	No	≥30g/L	≥30g/L	Orthopedic surgery	＜36℃	≥40	No	No	No	Yes	Internal validation set
67	Female	＜65	≥3	＜25kg/m2	No	Yes	No	Yes	Yes	No	Yes	Laparoscopic surgery	General anesthesia	≥270min	＜100ml	No	No	Yes	No	Yes	No	＜30g/L	＜30g/L	Orthopedic surgery	≥36℃	＜40	Yes	Yes	No	Yes	Internal validation set
68	Male	≥65	＜3	≥25kg/m2	No	Yes	No	No	Yes	Yes	No	Open surgery	Non-general anesthesia	≥270min	≥100ml	Yes	Yes	No	Yes	No	Yes	＜30g/L	≥30g/L	Urological surgery	＜36℃	≥40	No	Yes	Yes	Yes	Internal validation set
69	Male	＜65	≥3	＜25kg/m2	Yes	No	No	No	Yes	No	No	Open surgery	General anesthesia	≥270min	≥100ml	Yes	No	No	Yes	Yes	No	＜30g/L	≥30g/L	Gastrointestinal surgery	＜36℃	＜40	No	Yes	Yes	Yes	Internal validation set
70	Male	≥65	≥3	≥25kg/m2	Yes	No	Yes	Yes	No	Yes	Yes	Laparoscopic surgery	Non-general anesthesia	≥270min	＜100ml	Yes	No	No	No	Yes	Yes	＜30g/L	＜30g/L	Other surgery	≥36℃	≥40	No	Yes	No	Yes	Internal validation set
71	Male	≥65	＜3	≥25kg/m2	Yes	Yes	No	No	Yes	No	Yes	Open surgery	General anesthesia	≥270min	＜100ml	Yes	No	No	Yes	Yes	Yes	＜30g/L	＜30g/L	Gastrointestinal surgery	＜36℃	＜40	Yes	No	Yes	Yes	Internal validation set
72	Female	≥65	＜3	＜25kg/m2	No	No	No	No	Yes	Yes	Yes	Laparoscopic surgery	General anesthesia	＜270min	≥100ml	Yes	No	Yes	Yes	No	Yes	＜30g/L	＜30g/L	Gastrointestinal surgery	＜36℃	＜40	Yes	No	No	Yes	Internal validation set
73	Male	≥65	≥3	＜25kg/m2	No	No	No	No	Yes	No	Yes	Open surgery	Non-general anesthesia	≥270min	＜100ml	Yes	No	Yes	Yes	Yes	No	＜30g/L	≥30g/L	Urological surgery	≥36℃	＜40	No	Yes	Yes	Yes	Internal validation set
74	Male	≥65	≥3	≥25kg/m2	Yes	Yes	No	No	Yes	Yes	Yes	Open surgery	General anesthesia	≥270min	＜100ml	Yes	No	No	Yes	Yes	Yes	＜30g/L	＜30g/L	Other surgery	≥36℃	≥40	No	Yes	No	Yes	Internal validation set
75	Female	≥65	＜3	≥25kg/m2	Yes	No	No	No	Yes	Yes	Yes	Open surgery	General anesthesia	≥270min	≥100ml	No	No	Yes	Yes	No	No	＜30g/L	≥30g/L	Gastrointestinal surgery	＜36℃	≥40	No	Yes	Yes	Yes	Internal validation set
76	Female	≥65	＜3	＜25kg/m2	Yes	Yes	Yes	Yes	Yes	No	Yes	Laparoscopic surgery	Non-general anesthesia	≥270min	≥100ml	Yes	No	No	No	Yes	Yes	＜30g/L	≥30g/L	Orthopedic surgery	≥36℃	≥40	No	Yes	No	Yes	Internal validation set
77	Male	≥65	＜3	≥25kg/m2	Yes	Yes	No	Yes	Yes	Yes	No	Laparoscopic surgery	General anesthesia	≥270min	＜100ml	Yes	No	No	No	No	No	≥30g/L	≥30g/L	Other surgery	≥36℃	＜40	No	No	Yes	Yes	Internal validation set
78	Female	≥65	＜3	≥25kg/m2	Yes	No	No	No	Yes	Yes	No	Open surgery	General anesthesia	≥270min	＜100ml	No	No	Yes	No	No	Yes	＜30g/L	≥30g/L	Other surgery	≥36℃	＜40	Yes	Yes	No	Yes	Internal validation set
79	Female	≥65	＜3	≥25kg/m2	Yes	No	Yes	No	Yes	No	Yes	Open surgery	Non-general anesthesia	≥270min	＜100ml	Yes	Yes	Yes	No	Yes	Yes	≥30g/L	＜30g/L	Orthopedic surgery	＜36℃	≥40	No	No	No	Yes	Internal validation set
80	Male	≥65	≥3	≥25kg/m2	No	No	No	Yes	No	No	No	Laparoscopic surgery	General anesthesia	＜270min	≥100ml	Yes	Yes	No	No	No	Yes	＜30g/L	＜30g/L	Gastrointestinal surgery	≥36℃	≥40	Yes	Yes	No	Yes	Internal validation set
81	Female	＜65	＜3	＜25kg/m2	No	Yes	Yes	No	No	No	Yes	Open surgery	General anesthesia	≥270min	≥100ml	No	No	Yes	No	No	No	≥30g/L	＜30g/L	Orthopedic surgery	＜36℃	＜40	Yes	No	No	Yes	Internal validation set
82	Male	＜65	＜3	＜25kg/m2	No	No	No	No	Yes	No	Yes	Open surgery	Non-general anesthesia	≥270min	＜100ml	No	No	Yes	No	No	Yes	＜30g/L	＜30g/L	Orthopedic surgery	＜36℃	＜40	No	Yes	No	Yes	Internal validation set
83	Female	≥65	≥3	≥25kg/m2	No	Yes	No	Yes	Yes	Yes	No	Laparoscopic surgery	General anesthesia	≥270min	＜100ml	No	Yes	No	No	Yes	Yes	＜30g/L	＜30g/L	Gastrointestinal surgery	≥36℃	≥40	No	Yes	No	Yes	Internal validation set
84	Female	≥65	≥3	≥25kg/m2	Yes	Yes	No	Yes	Yes	Yes	No	Laparoscopic surgery	Non-general anesthesia	＜270min	≥100ml	No	No	Yes	No	No	No	≥30g/L	≥30g/L	Other surgery	＜36℃	＜40	Yes	No	Yes	Yes	Internal validation set
85	Male	≥65	≥3	≥25kg/m2	No	No	No	No	Yes	No	Yes	Open surgery	General anesthesia	≥270min	＜100ml	No	No	No	No	No	Yes	＜30g/L	≥30g/L	Orthopedic surgery	＜36℃	＜40	Yes	Yes	Yes	Yes	Internal validation set
86	Female	≥65	＜3	＜25kg/m2	Yes	Yes	Yes	No	Yes	No	Yes	Open surgery	Non-general anesthesia	＜270min	＜100ml	Yes	Yes	No	No	No	No	＜30g/L	＜30g/L	Other surgery	＜36℃	≥40	No	No	Yes	Yes	Internal validation set
87	Male	≥65	＜3	＜25kg/m2	No	Yes	No	No	Yes	Yes	Yes	Open surgery	General anesthesia	≥270min	＜100ml	Yes	Yes	No	No	Yes	Yes	≥30g/L	≥30g/L	Orthopedic surgery	＜36℃	≥40	No	Yes	Yes	Yes	Internal validation set
88	Female	≥65	＜3	≥25kg/m2	Yes	Yes	No	Yes	No	Yes	No	Laparoscopic surgery	General anesthesia	＜270min	＜100ml	Yes	No	No	No	No	No	≥30g/L	≥30g/L	Gastrointestinal surgery	≥36℃	≥40	Yes	Yes	Yes	Yes	Internal validation set
89	Female	≥65	＜3	≥25kg/m2	No	No	No	Yes	Yes	No	No	Laparoscopic surgery	Non-general anesthesia	≥270min	＜100ml	No	No	No	No	Yes	No	＜30g/L	≥30g/L	Gastrointestinal surgery	＜36℃	≥40	No	No	Yes	Yes	Internal validation set
90	Male	≥65	＜3	≥25kg/m2	No	No	Yes	No	Yes	Yes	No	Open surgery	General anesthesia	≥270min	＜100ml	Yes	No	No	No	No	No	≥30g/L	≥30g/L	Orthopedic surgery	＜36℃	≥40	Yes	Yes	No	Yes	Internal validation set
91	Male	≥65	≥3	＜25kg/m2	Yes	Yes	No	No	Yes	No	Yes	Open surgery	Non-general anesthesia	≥270min	＜100ml	Yes	No	No	No	No	No	≥30g/L	≥30g/L	Urological surgery	＜36℃	≥40	No	No	No	Yes	Internal validation set
92	Female	≥65	≥3	＜25kg/m2	Yes	Yes	Yes	Yes	Yes	No	No	Laparoscopic surgery	General anesthesia	≥270min	＜100ml	No	No	Yes	No	Yes	No	＜30g/L	＜30g/L	Urological surgery	≥36℃	≥40	No	Yes	No	Yes	Internal validation set
93	Female	≥65	＜3	≥25kg/m2	Yes	Yes	No	No	Yes	No	Yes	Open surgery	General anesthesia	≥270min	＜100ml	Yes	No	Yes	No	Yes	Yes	≥30g/L	≥30g/L	Gastrointestinal surgery	＜36℃	≥40	No	No	Yes	Yes	Internal validation set
94	Female	＜65	＜3	＜25kg/m2	Yes	No	No	No	Yes	No	Yes	Open surgery	Non-general anesthesia	≥270min	＜100ml	No	No	No	No	No	No	≥30g/L	≥30g/L	Cardiovascular surgery	≥36℃	≥40	Yes	Yes	Yes	Yes	Internal validation set
95	Male	≥65	＜3	≥25kg/m2	Yes	Yes	Yes	No	Yes	No	Yes	Open surgery	General anesthesia	＜270min	＜100ml	Yes	No	Yes	Yes	No	Yes	＜30g/L	＜30g/L	Cardiovascular surgery	＜36℃	≥40	Yes	Yes	Yes	Yes	Internal validation set
96	Male	≥65	≥3	＜25kg/m2	Yes	Yes	Yes	No	Yes	No	Yes	Open surgery	Non-general anesthesia	＜270min	≥100ml	Yes	Yes	No	Yes	No	No	＜30g/L	＜30g/L	Orthopedic surgery	≥36℃	＜40	No	No	Yes	Yes	Internal validation set
97	Female	≥65	＜3	＜25kg/m2	Yes	Yes	Yes	No	Yes	No	Yes	Open surgery	General anesthesia	≥270min	＜100ml	Yes	Yes	No	No	No	Yes	≥30g/L	＜30g/L	Gastrointestinal surgery	≥36℃	＜40	No	No	No	Yes	Internal validation set
98	Female	≥65	＜3	≥25kg/m2	No	Yes	No	No	No	No	Yes	Open surgery	Non-general anesthesia	＜270min	＜100ml	No	Yes	No	No	No	Yes	≥30g/L	≥30g/L	Gastrointestinal surgery	≥36℃	≥40	Yes	No	Yes	Yes	Internal validation set
99	Male	≥65	＜3	≥25kg/m2	No	Yes	No	No	No	No	Yes	Open surgery	General anesthesia	≥270min	≥100ml	Yes	Yes	No	Yes	No	No	＜30g/L	＜30g/L	Gastrointestinal surgery	＜36℃	＜40	Yes	No	No	Yes	Internal validation set
100	Female	≥65	＜3	≥25kg/m2	Yes	Yes	Yes	No	Yes	No	No	Open surgery	General anesthesia	≥270min	＜100ml	Yes	Yes	No	No	No	Yes	＜30g/L	＜30g/L	Cardiovascular surgery	≥36℃	≥40	Yes	Yes	No	Yes	Internal validation set
101	Female	≥65	＜3	＜25kg/m2	Yes	No	No	No	Yes	No	No	Open surgery	Non-general anesthesia	＜270min	＜100ml	Yes	Yes	No	No	No	No	≥30g/L	＜30g/L	Urological surgery	＜36℃	＜40	No	No	Yes	Yes	Internal validation set
102	Male	≥65	≥3	＜25kg/m2	Yes	Yes	Yes	No	Yes	No	Yes	Open surgery	Non-general anesthesia	＜270min	≥100ml	No	Yes	No	Yes	No	Yes	＜30g/L	＜30g/L	Orthopedic surgery	≥36℃	≥40	No	No	Yes	Yes	Internal validation set
103	Female	≥65	＜3	≥25kg/m2	Yes	Yes	No	Yes	Yes	No	Yes	Laparoscopic surgery	Non-general anesthesia	≥270min	≥100ml	Yes	Yes	Yes	Yes	No	No	＜30g/L	＜30g/L	Gastrointestinal surgery	＜36℃	＜40	No	Yes	No	Yes	Internal validation set
104	Female	≥65	＜3	≥25kg/m2	Yes	No	No	Yes	Yes	No	Yes	Laparoscopic surgery	Non-general anesthesia	＜270min	＜100ml	Yes	Yes	Yes	No	No	No	＜30g/L	＜30g/L	Cardiovascular surgery	≥36℃	＜40	Yes	No	No	Yes	Internal validation set
105	Female	≥65	≥3	≥25kg/m2	Yes	No	No	No	Yes	No	Yes	Open surgery	Non-general anesthesia	≥270min	＜100ml	No	Yes	No	No	No	Yes	＜30g/L	≥30g/L	Orthopedic surgery	≥36℃	≥40	No	No	Yes	Yes	Internal validation set
106	Female	≥65	＜3	＜25kg/m2	Yes	No	No	No	Yes	No	Yes	Open surgery	Non-general anesthesia	≥270min	＜100ml	No	No	Yes	No	No	No	≥30g/L	＜30g/L	Other surgery	＜36℃	＜40	No	No	Yes	Yes	Internal validation set
107	Male	≥65	＜3	＜25kg/m2	No	No	Yes	Yes	No	No	Yes	Laparoscopic surgery	General anesthesia	≥270min	＜100ml	Yes	No	No	No	No	No	＜30g/L	≥30g/L	Orthopedic surgery	＜36℃	≥40	Yes	No	No	Yes	Internal validation set
108	Male	≥65	＜3	＜25kg/m2	No	No	No	No	Yes	No	Yes	Open surgery	General anesthesia	≥270min	＜100ml	Yes	No	No	No	No	Yes	＜30g/L	≥30g/L	Urological surgery	＜36℃	＜40	No	Yes	No	Yes	Internal validation set
109	Female	≥65	＜3	≥25kg/m2	Yes	No	No	No	Yes	No	No	Open surgery	Non-general anesthesia	≥270min	＜100ml	No	No	Yes	No	Yes	No	＜30g/L	＜30g/L	Urological surgery	＜36℃	≥40	No	No	No	Yes	Internal validation set
110	Female	≥65	＜3	≥25kg/m2	No	No	No	Yes	No	No	No	Laparoscopic surgery	Non-general anesthesia	＜270min	＜100ml	No	Yes	Yes	No	No	Yes	≥30g/L	＜30g/L	Orthopedic surgery	≥36℃	＜40	No	Yes	Yes	Yes	Internal validation set
111	Female	≥65	≥3	＜25kg/m2	Yes	No	Yes	Yes	Yes	No	Yes	Laparoscopic surgery	General anesthesia	＜270min	＜100ml	Yes	No	No	No	No	Yes	＜30g/L	≥30g/L	Other surgery	≥36℃	≥40	Yes	No	Yes	Yes	Internal validation set
112	Female	≥65	＜3	＜25kg/m2	Yes	No	No	No	Yes	No	No	Open surgery	General anesthesia	≥270min	≥100ml	Yes	No	Yes	Yes	No	Yes	≥30g/L	＜30g/L	Cardiovascular surgery	＜36℃	＜40	Yes	Yes	No	Yes	Internal validation set
113	Female	≥65	＜3	≥25kg/m2	No	No	Yes	No	No	No	Yes	Open surgery	General anesthesia	≥270min	≥100ml	Yes	Yes	Yes	Yes	No	Yes	＜30g/L	≥30g/L	Gastrointestinal surgery	＜36℃	≥40	No	No	Yes	Yes	Internal validation set
114	Female	≥65	＜3	≥25kg/m2	No	No	No	No	No	No	Yes	Open surgery	Non-general anesthesia	≥270min	≥100ml	Yes	Yes	No	No	No	Yes	≥30g/L	≥30g/L	Gastrointestinal surgery	＜36℃	≥40	No	No	No	Yes	Internal validation set
115	Male	≥65	＜3	≥25kg/m2	Yes	No	No	No	No	No	No	Open surgery	General anesthesia	≥270min	≥100ml	Yes	No	Yes	No	No	Yes	≥30g/L	≥30g/L	Orthopedic surgery	≥36℃	≥40	No	Yes	No	Yes	Internal validation set
116	Male	＜65	＜3	＜25kg/m2	Yes	No	Yes	No	No	No	No	Open surgery	Non-general anesthesia	＜270min	＜100ml	Yes	Yes	No	Yes	No	No	≥30g/L	＜30g/L	Gastrointestinal surgery	≥36℃	≥40	Yes	Yes	No	No	Internal validation set
117	Female	＜65	＜3	＜25kg/m2	No	No	Yes	No	No	No	No	Open surgery	General anesthesia	＜270min	≥100ml	No	No	No	No	No	No	＜30g/L	≥30g/L	Gastrointestinal surgery	＜36℃	≥40	Yes	No	Yes	No	Internal validation set
118	Female	＜65	＜3	＜25kg/m2	No	Yes	Yes	No	No	No	No	Open surgery	General anesthesia	＜270min	≥100ml	No	No	No	No	No	No	＜30g/L	＜30g/L	Gastrointestinal surgery	＜36℃	＜40	No	No	Yes	No	Internal validation set
119	Female	＜65	≥3	＜25kg/m2	No	Yes	Yes	No	No	No	No	Open surgery	General anesthesia	≥270min	≥100ml	No	Yes	No	Yes	No	No	＜30g/L	＜30g/L	Other surgery	＜36℃	≥40	No	Yes	Yes	No	Internal validation set
120	Male	≥65	≥3	≥25kg/m2	No	Yes	No	Yes	No	No	No	Laparoscopic surgery	General anesthesia	≥270min	≥100ml	Yes	Yes	No	Yes	No	No	＜30g/L	≥30g/L	Urological surgery	≥36℃	≥40	No	No	No	No	Internal validation set
121	Male	≥65	＜3	＜25kg/m2	No	No	No	Yes	No	No	No	Laparoscopic surgery	General anesthesia	≥270min	≥100ml	No	No	No	Yes	No	No	＜30g/L	≥30g/L	Other surgery	≥36℃	≥40	Yes	No	No	No	Internal validation set
122	Male	≥65	＜3	≥25kg/m2	No	No	No	Yes	No	No	No	Laparoscopic surgery	General anesthesia	≥270min	＜100ml	Yes	Yes	No	No	No	No	≥30g/L	≥30g/L	Urological surgery	＜36℃	＜40	No	No	No	No	Internal validation set
123	Male	≥65	＜3	≥25kg/m2	No	Yes	Yes	Yes	No	No	No	Laparoscopic surgery	General anesthesia	＜270min	＜100ml	No	Yes	Yes	No	No	No	＜30g/L	≥30g/L	Orthopedic surgery	＜36℃	≥40	Yes	Yes	No	No	Internal validation set
124	Male	≥65	＜3	＜25kg/m2	No	Yes	Yes	Yes	No	No	No	Open surgery	General anesthesia	＜270min	＜100ml	Yes	No	Yes	No	No	Yes	≥30g/L	≥30g/L	Urological surgery	＜36℃	≥40	No	No	No	No	Internal validation set
125	Male	≥65	＜3	＜25kg/m2	No	Yes	No	Yes	No	No	No	Laparoscopic surgery	General anesthesia	＜270min	＜100ml	No	No	No	No	No	Yes	≥30g/L	＜30g/L	Urological surgery	≥36℃	≥40	No	No	No	No	Internal validation set
126	Female	≥65	＜3	＜25kg/m2	No	Yes	No	Yes	Yes	Yes	No	Laparoscopic surgery	Non-general anesthesia	＜270min	≥100ml	Yes	Yes	Yes	Yes	No	Yes	≥30g/L	≥30g/L	Other surgery	≥36℃	＜40	Yes	Yes	Yes	No	Internal validation set
127	Female	≥65	＜3	≥25kg/m2	No	Yes	No	Yes	No	Yes	No	Laparoscopic surgery	General anesthesia	≥270min	＜100ml	Yes	Yes	No	No	No	No	＜30g/L	≥30g/L	Orthopedic surgery	＜36℃	≥40	No	No	Yes	No	Internal validation set
128	Male	≥65	＜3	＜25kg/m2	No	Yes	Yes	Yes	No	Yes	No	Open surgery	General anesthesia	＜270min	＜100ml	Yes	Yes	No	No	No	No	＜30g/L	≥30g/L	Cardiovascular surgery	＜36℃	≥40	Yes	Yes	Yes	No	Internal validation set
129	Male	≥65	≥3	≥25kg/m2	No	Yes	Yes	Yes	No	No	No	Laparoscopic surgery	General anesthesia	＜270min	≥100ml	Yes	No	No	Yes	No	Yes	≥30g/L	≥30g/L	Urological surgery	＜36℃	≥40	No	No	Yes	No	Internal validation set
130	Male	≥65	≥3	≥25kg/m2	No	No	No	No	No	No	No	Open surgery	Non-general anesthesia	＜270min	≥100ml	No	No	Yes	Yes	No	Yes	＜30g/L	＜30g/L	Gastrointestinal surgery	≥36℃	≥40	Yes	No	Yes	No	Internal validation set
131	Female	＜65	≥3	＜25kg/m2	No	No	No	No	No	No	No	Open surgery	Non-general anesthesia	＜270min	＜100ml	Yes	No	Yes	No	No	No	≥30g/L	≥30g/L	Urological surgery	＜36℃	≥40	Yes	No	No	No	Internal validation set
132	Male	＜65	＜3	＜25kg/m2	No	Yes	Yes	No	No	No	No	Open surgery	Non-general anesthesia	＜270min	＜100ml	Yes	No	No	No	No	Yes	＜30g/L	＜30g/L	Gastrointestinal surgery	＜36℃	＜40	Yes	No	Yes	No	Internal validation set
133	Male	＜65	≥3	＜25kg/m2	No	No	No	No	No	Yes	No	Open surgery	Non-general anesthesia	＜270min	≥100ml	Yes	No	Yes	No	No	Yes	≥30g/L	≥30g/L	Gastrointestinal surgery	≥36℃	≥40	No	Yes	Yes	No	Internal validation set
134	Male	≥65	＜3	≥25kg/m2	No	Yes	Yes	Yes	No	No	No	Open surgery	Non-general anesthesia	≥270min	≥100ml	Yes	No	No	No	No	No	≥30g/L	≥30g/L	Gastrointestinal surgery	＜36℃	≥40	Yes	Yes	No	No	Internal validation set
135	Male	≥65	＜3	≥25kg/m2	No	Yes	No	No	No	No	No	Open surgery	Non-general anesthesia	≥270min	≥100ml	Yes	No	No	Yes	No	Yes	＜30g/L	≥30g/L	Gastrointestinal surgery	≥36℃	＜40	No	No	No	No	Internal validation set
136	Female	≥65	＜3	＜25kg/m2	No	No	No	No	No	No	No	Open surgery	Non-general anesthesia	≥270min	≥100ml	Yes	No	Yes	Yes	Yes	Yes	＜30g/L	＜30g/L	Gastrointestinal surgery	≥36℃	≥40	No	Yes	Yes	No	Internal validation set
137	Female	≥65	＜3	＜25kg/m2	No	No	No	Yes	No	No	No	Laparoscopic surgery	Non-general anesthesia	≥270min	＜100ml	Yes	No	Yes	No	No	Yes	≥30g/L	≥30g/L	Other surgery	≥36℃	≥40	Yes	Yes	Yes	No	Internal validation set
138	Female	≥65	＜3	≥25kg/m2	No	No	No	Yes	Yes	No	Yes	Laparoscopic surgery	Non-general anesthesia	≥270min	＜100ml	No	No	No	Yes	No	Yes	≥30g/L	≥30g/L	Cardiovascular surgery	≥36℃	≥40	No	No	No	No	Internal validation set
139	Female	≥65	＜3	≥25kg/m2	No	No	Yes	No	Yes	No	No	Open surgery	Non-general anesthesia	＜270min	＜100ml	Yes	No	Yes	Yes	No	No	＜30g/L	≥30g/L	Urological surgery	≥36℃	≥40	No	No	No	No	Internal validation set
140	Female	≥65	≥3	＜25kg/m2	No	No	No	Yes	No	Yes	Yes	Laparoscopic surgery	Non-general anesthesia	≥270min	≥100ml	No	No	Yes	No	Yes	Yes	＜30g/L	≥30g/L	Urological surgery	≥36℃	≥40	Yes	Yes	No	No	Internal validation set
141	Female	≥65	＜3	≥25kg/m2	No	No	No	No	No	Yes	Yes	Open surgery	General anesthesia	＜270min	≥100ml	No	No	No	No	Yes	Yes	＜30g/L	＜30g/L	Cardiovascular surgery	≥36℃	＜40	No	No	Yes	No	Internal validation set
142	Female	≥65	≥3	≥25kg/m2	No	No	No	No	No	Yes	Yes	Open surgery	General anesthesia	≥270min	≥100ml	No	No	Yes	Yes	No	Yes	＜30g/L	≥30g/L	Urological surgery	≥36℃	＜40	Yes	Yes	Yes	No	Internal validation set
143	Male	≥65	≥3	＜25kg/m2	Yes	No	Yes	Yes	No	No	No	Laparoscopic surgery	Non-general anesthesia	＜270min	≥100ml	No	No	No	Yes	Yes	No	＜30g/L	≥30g/L	Orthopedic surgery	＜36℃	≥40	Yes	Yes	No	No	Internal validation set
144	Male	≥65	≥3	＜25kg/m2	Yes	No	No	Yes	No	No	Yes	Open surgery	General anesthesia	≥270min	≥100ml	Yes	No	No	Yes	Yes	Yes	≥30g/L	≥30g/L	Urological surgery	＜36℃	≥40	No	No	Yes	No	Internal validation set
145	Female	≥65	≥3	≥25kg/m2	No	No	Yes	No	No	No	Yes	Open surgery	General anesthesia	≥270min	＜100ml	No	No	No	No	No	Yes	≥30g/L	＜30g/L	Cardiovascular surgery	≥36℃	≥40	Yes	Yes	Yes	No	Internal validation set
146	Male	≥65	＜3	＜25kg/m2	Yes	No	No	Yes	Yes	No	Yes	Laparoscopic surgery	Non-general anesthesia	＜270min	＜100ml	Yes	No	Yes	No	Yes	Yes	＜30g/L	≥30g/L	Gastrointestinal surgery	＜36℃	≥40	No	No	No	No	Internal validation set
147	Male	≥65	＜3	＜25kg/m2	Yes	No	No	Yes	No	No	Yes	Open surgery	General anesthesia	＜270min	＜100ml	No	No	Yes	No	Yes	No	＜30g/L	＜30g/L	Gastrointestinal surgery	＜36℃	≥40	Yes	Yes	No	No	Internal validation set
148	Male	≥65	＜3	≥25kg/m2	No	No	Yes	No	No	Yes	Yes	Open surgery	General anesthesia	≥270min	＜100ml	Yes	No	No	No	No	Yes	≥30g/L	＜30g/L	Urological surgery	＜36℃	＜40	No	No	No	No	Internal validation set
149	Female	≥65	＜3	≥25kg/m2	No	No	Yes	Yes	No	Yes	No	Laparoscopic surgery	Non-general anesthesia	＜270min	＜100ml	No	No	Yes	No	Yes	Yes	＜30g/L	≥30g/L	Gastrointestinal surgery	＜36℃	＜40	No	No	No	No	Internal validation set
150	Male	≥65	＜3	＜25kg/m2	Yes	No	Yes	No	No	Yes	Yes	Open surgery	Non-general anesthesia	≥270min	＜100ml	Yes	No	No	No	No	No	＜30g/L	＜30g/L	Other surgery	≥36℃	＜40	Yes	Yes	Yes	No	Internal validation set
151	Female	≥65	＜3	＜25kg/m2	Yes	Yes	Yes	No	No	No	No	Open surgery	General anesthesia	＜270min	＜100ml	Yes	No	No	No	No	No	≥30g/L	≥30g/L	Cardiovascular surgery	≥36℃	＜40	No	No	No	No	Internal validation set
152	Female	＜65	＜3	＜25kg/m2	Yes	No	No	No	No	No	Yes	Open surgery	General anesthesia	＜270min	≥100ml	Yes	No	Yes	No	No	Yes	＜30g/L	≥30g/L	Gastrointestinal surgery	≥36℃	＜40	Yes	No	Yes	No	Internal validation set
153	Female	＜65	＜3	＜25kg/m2	No	No	No	No	No	No	Yes	Open surgery	General anesthesia	≥270min	＜100ml	Yes	No	Yes	No	No	Yes	≥30g/L	＜30g/L	Other surgery	≥36℃	＜40	Yes	Yes	Yes	No	Internal validation set
154	Female	＜65	≥3	＜25kg/m2	No	No	No	Yes	No	No	Yes	Laparoscopic surgery	General anesthesia	≥270min	＜100ml	No	No	No	No	No	No	≥30g/L	≥30g/L	Other surgery	≥36℃	≥40	No	No	Yes	No	Internal validation set
155	Male	≥65	＜3	＜25kg/m2	No	No	Yes	Yes	No	Yes	No	Laparoscopic surgery	Non-general anesthesia	＜270min	＜100ml	Yes	Yes	Yes	No	No	Yes	≥30g/L	＜30g/L	Urological surgery	＜36℃	≥40	No	Yes	Yes	No	Internal validation set
156	Male	≥65	＜3	＜25kg/m2	No	No	No	No	No	No	Yes	Open surgery	Non-general anesthesia	≥270min	≥100ml	Yes	Yes	Yes	No	No	No	＜30g/L	＜30g/L	Orthopedic surgery	＜36℃	＜40	Yes	Yes	No	No	Internal validation set
157	Male	≥65	≥3	≥25kg/m2	No	No	No	Yes	No	No	Yes	Laparoscopic surgery	General anesthesia	≥270min	＜100ml	Yes	No	No	No	No	Yes	＜30g/L	＜30g/L	Cardiovascular surgery	＜36℃	＜40	Yes	No	Yes	No	Internal validation set
158	Female	≥65	≥3	≥25kg/m2	No	No	No	No	Yes	No	Yes	Open surgery	General anesthesia	＜270min	≥100ml	Yes	Yes	Yes	Yes	No	Yes	≥30g/L	＜30g/L	Orthopedic surgery	＜36℃	≥40	Yes	Yes	No	No	Internal validation set
159	Male	≥65	＜3	≥25kg/m2	No	No	Yes	No	No	No	No	Open surgery	Non-general anesthesia	≥270min	＜100ml	Yes	Yes	No	Yes	No	Yes	≥30g/L	＜30g/L	Cardiovascular surgery	＜36℃	＜40	Yes	Yes	No	No	Internal validation set
160	Male	≥65	＜3	＜25kg/m2	No	No	Yes	Yes	No	No	Yes	Laparoscopic surgery	General anesthesia	＜270min	＜100ml	Yes	No	No	Yes	No	Yes	＜30g/L	≥30g/L	Orthopedic surgery	＜36℃	≥40	Yes	No	No	No	Internal validation set
161	Female	≥65	＜3	≥25kg/m2	No	No	Yes	Yes	No	No	Yes	Laparoscopic surgery	General anesthesia	＜270min	≥100ml	Yes	No	No	Yes	No	Yes	≥30g/L	＜30g/L	Gastrointestinal surgery	＜36℃	＜40	No	Yes	No	No	Internal validation set
162	Female	＜65	＜3	＜25kg/m2	No	No	Yes	No	No	No	Yes	Open surgery	Non-general anesthesia	＜270min	≥100ml	No	Yes	No	Yes	No	No	＜30g/L	＜30g/L	Other surgery	＜36℃	＜40	No	No	Yes	No	Internal validation set
163	Male	＜65	＜3	＜25kg/m2	No	Yes	No	Yes	Yes	No	Yes	Laparoscopic surgery	Non-general anesthesia	≥270min	≥100ml	Yes	Yes	No	Yes	No	No	≥30g/L	＜30g/L	Gastrointestinal surgery	≥36℃	≥40	No	Yes	No	No	Internal validation set
164	Male	≥65	＜3	＜25kg/m2	No	Yes	Yes	Yes	No	No	Yes	Laparoscopic surgery	General anesthesia	≥270min	≥100ml	No	Yes	No	No	No	Yes	≥30g/L	＜30g/L	Urological surgery	＜36℃	≥40	No	No	Yes	No	Internal validation set
165	Female	≥65	＜3	＜25kg/m2	No	No	Yes	No	No	No	No	Open surgery	General anesthesia	＜270min	＜100ml	No	No	No	No	No	No	≥30g/L	≥30g/L	Gastrointestinal surgery	≥36℃	＜40	No	Yes	No	No	Internal validation set
166	Female	≥65	＜3	≥25kg/m2	No	No	Yes	Yes	No	No	No	Laparoscopic surgery	General anesthesia	≥270min	＜100ml	No	No	Yes	No	No	No	≥30g/L	≥30g/L	Orthopedic surgery	≥36℃	＜40	No	No	No	No	Internal validation set
167	Female	≥65	＜3	≥25kg/m2	No	No	Yes	No	No	Yes	No	Open surgery	Non-general anesthesia	＜270min	＜100ml	Yes	No	Yes	No	Yes	No	＜30g/L	≥30g/L	Gastrointestinal surgery	＜36℃	＜40	Yes	Yes	Yes	No	Internal validation set
168	Female	≥65	≥3	＜25kg/m2	No	No	No	No	No	No	No	Open surgery	Non-general anesthesia	＜270min	≥100ml	No	No	No	No	Yes	No	≥30g/L	≥30g/L	Gastrointestinal surgery	≥36℃	＜40	Yes	No	Yes	No	Internal validation set
169	Female	≥65	≥3	＜25kg/m2	No	No	No	No	No	No	No	Open surgery	General anesthesia	≥270min	≥100ml	Yes	No	Yes	No	No	No	＜30g/L	＜30g/L	Gastrointestinal surgery	＜36℃	≥40	No	Yes	Yes	No	Internal validation set
170	Male	≥65	≥3	≥25kg/m2	No	No	No	No	No	No	No	Open surgery	General anesthesia	＜270min	≥100ml	Yes	No	No	No	Yes	No	＜30g/L	≥30g/L	Urological surgery	≥36℃	≥40	Yes	No	No	No	Internal validation set
171	Male	≥65	＜3	≥25kg/m2	No	Yes	No	No	No	No	No	Open surgery	Non-general anesthesia	＜270min	≥100ml	Yes	No	No	Yes	No	Yes	＜30g/L	≥30g/L	Gastrointestinal surgery	≥36℃	＜40	Yes	Yes	Yes	No	Internal validation set
172	Female	＜65	≥3	＜25kg/m2	No	No	No	No	No	Yes	No	Open surgery	Non-general anesthesia	＜270min	≥100ml	Yes	No	No	Yes	Yes	No	≥30g/L	＜30g/L	Gastrointestinal surgery	＜36℃	≥40	No	No	No	No	Internal validation set
173	Female	＜65	＜3	＜25kg/m2	No	No	No	No	No	No	No	Open surgery	Non-general anesthesia	＜270min	＜100ml	Yes	No	No	No	Yes	No	＜30g/L	＜30g/L	Orthopedic surgery	＜36℃	＜40	Yes	Yes	Yes	No	Internal validation set
174	Female	≥65	＜3	≥25kg/m2	No	No	No	Yes	No	Yes	No	Laparoscopic surgery	General anesthesia	＜270min	＜100ml	Yes	No	No	Yes	No	No	＜30g/L	≥30g/L	Gastrointestinal surgery	＜36℃	≥40	Yes	No	No	No	Internal validation set
175	Female	≥65	＜3	≥25kg/m2	No	No	Yes	Yes	Yes	Yes	No	Laparoscopic surgery	Non-general anesthesia	＜270min	＜100ml	Yes	No	No	Yes	Yes	No	≥30g/L	＜30g/L	Other surgery	＜36℃	＜40	No	No	No	No	Internal validation set
176	Female	≥65	＜3	≥25kg/m2	No	No	No	No	No	Yes	No	Open surgery	Non-general anesthesia	＜270min	＜100ml	No	No	No	No	Yes	No	≥30g/L	≥30g/L	Other surgery	≥36℃	≥40	Yes	No	No	No	Internal validation set
177	Male	≥65	＜3	＜25kg/m2	No	No	No	Yes	No	Yes	No	Laparoscopic surgery	General anesthesia	＜270min	＜100ml	No	No	No	No	No	No	≥30g/L	＜30g/L	Urological surgery	＜36℃	≥40	No	No	No	No	Internal validation set
178	Male	≥65	＜3	＜25kg/m2	No	No	No	No	No	No	No	Open surgery	Non-general anesthesia	＜270min	≥100ml	Yes	No	Yes	Yes	No	No	＜30g/L	＜30g/L	Urological surgery	＜36℃	≥40	No	No	No	No	Internal validation set
179	Male	≥65	＜3	＜25kg/m2	Yes	No	No	No	No	Yes	Yes	Open surgery	Non-general anesthesia	＜270min	＜100ml	Yes	No	Yes	No	Yes	Yes	≥30g/L	≥30g/L	Orthopedic surgery	＜36℃	≥40	No	Yes	Yes	No	Internal validation set
180	Male	≥65	＜3	≥25kg/m2	Yes	No	Yes	No	No	Yes	Yes	Open surgery	Non-general anesthesia	＜270min	≥100ml	Yes	No	No	No	Yes	Yes	≥30g/L	＜30g/L	Urological surgery	≥36℃	≥40	No	Yes	Yes	No	Internal validation set
181	Female	≥65	＜3	≥25kg/m2	No	No	Yes	No	No	Yes	No	Open surgery	General anesthesia	＜270min	＜100ml	Yes	No	Yes	No	Yes	Yes	≥30g/L	≥30g/L	Other surgery	＜36℃	≥40	No	No	No	No	Internal validation set
182	Male	≥65	＜3	＜25kg/m2	Yes	No	Yes	No	No	Yes	Yes	Open surgery	Non-general anesthesia	＜270min	＜100ml	Yes	No	No	No	Yes	No	＜30g/L	＜30g/L	Gastrointestinal surgery	≥36℃	≥40	Yes	Yes	No	No	Internal validation set
183	Male	≥65	≥3	≥25kg/m2	Yes	Yes	Yes	No	Yes	No	No	Open surgery	Non-general anesthesia	＜270min	≥100ml	Yes	No	No	No	No	No	＜30g/L	＜30g/L	Urological surgery	≥36℃	＜40	No	Yes	Yes	No	Internal validation set
184	Female	≥65	≥3	≥25kg/m2	No	No	No	No	No	No	No	Open surgery	General anesthesia	＜270min	＜100ml	Yes	No	Yes	No	No	Yes	＜30g/L	≥30g/L	Gastrointestinal surgery	≥36℃	＜40	Yes	Yes	Yes	No	Internal validation set
185	Female	≥65	≥3	＜25kg/m2	No	No	No	Yes	No	No	Yes	Laparoscopic surgery	Non-general anesthesia	＜270min	＜100ml	No	No	Yes	No	Yes	No	＜30g/L	＜30g/L	Orthopedic surgery	≥36℃	≥40	No	Yes	No	No	Internal validation set
186	Male	＜65	＜3	＜25kg/m2	Yes	No	Yes	Yes	No	No	Yes	Laparoscopic surgery	Non-general anesthesia	＜270min	＜100ml	No	No	No	No	Yes	Yes	＜30g/L	≥30g/L	Gastrointestinal surgery	＜36℃	＜40	Yes	Yes	Yes	No	Internal validation set
187	Male	＜65	≥3	＜25kg/m2	Yes	No	No	No	No	Yes	No	Open surgery	General anesthesia	＜270min	≥100ml	Yes	No	Yes	No	No	Yes	＜30g/L	≥30g/L	Urological surgery	≥36℃	≥40	Yes	Yes	No	No	Internal validation set
188	Male	＜65	＜3	＜25kg/m2	Yes	Yes	Yes	Yes	No	Yes	Yes	Laparoscopic surgery	General anesthesia	＜270min	＜100ml	No	No	Yes	No	Yes	Yes	＜30g/L	≥30g/L	Gastrointestinal surgery	≥36℃	≥40	No	Yes	Yes	No	Internal validation set
189	Female	≥65	＜3	＜25kg/m2	No	No	No	No	No	Yes	Yes	Open surgery	General anesthesia	≥270min	＜100ml	Yes	No	No	No	Yes	No	≥30g/L	≥30g/L	Gastrointestinal surgery	≥36℃	＜40	No	No	No	No	Internal validation set
190	Male	≥65	＜3	＜25kg/m2	No	No	No	No	No	Yes	No	Open surgery	Non-general anesthesia	≥270min	＜100ml	Yes	No	Yes	No	No	Yes	＜30g/L	＜30g/L	Urological surgery	＜36℃	＜40	No	Yes	Yes	No	Internal validation set
191	Female	≥65	＜3	≥25kg/m2	No	No	No	Yes	No	No	Yes	Laparoscopic surgery	General anesthesia	≥270min	＜100ml	No	No	No	No	No	No	≥30g/L	≥30g/L	Other surgery	≥36℃	≥40	No	No	Yes	No	Internal validation set
192	Male	≥65	＜3	≥25kg/m2	No	No	No	No	No	No	No	Laparoscopic surgery	General anesthesia	≥270min	＜100ml	No	No	No	No	No	No	≥30g/L	＜30g/L	Gastrointestinal surgery	＜36℃	≥40	No	Yes	Yes	No	Internal validation set
193	Male	≥65	＜3	≥25kg/m2	No	No	Yes	No	No	No	No	Open surgery	General anesthesia	≥270min	≥100ml	Yes	No	No	No	No	Yes	≥30g/L	＜30g/L	Orthopedic surgery	＜36℃	≥40	Yes	Yes	No	No	Internal validation set
194	Male	≥65	＜3	＜25kg/m2	No	No	No	No	No	Yes	No	Laparoscopic surgery	Non-general anesthesia	＜270min	≥100ml	Yes	No	No	No	No	Yes	＜30g/L	＜30g/L	Urological surgery	＜36℃	＜40	No	Yes	Yes	No	Internal validation set
195	Male	≥65	＜3	＜25kg/m2	No	No	No	Yes	Yes	No	Yes	Laparoscopic surgery	General anesthesia	≥270min	≥100ml	Yes	No	No	No	No	Yes	≥30g/L	＜30g/L	Orthopedic surgery	＜36℃	＜40	No	Yes	No	No	Internal validation set
196	Male	≥65	≥3	≥25kg/m2	No	No	No	No	No	No	Yes	Open surgery	Non-general anesthesia	＜270min	≥100ml	No	No	No	No	No	Yes	≥30g/L	＜30g/L	Gastrointestinal surgery	＜36℃	＜40	No	No	No	No	Internal validation set
197	Male	≥65	＜3	≥25kg/m2	No	No	Yes	No	No	No	No	Laparoscopic surgery	Non-general anesthesia	≥270min	＜100ml	No	No	No	No	No	Yes	＜30g/L	＜30g/L	Gastrointestinal surgery	≥36℃	≥40	No	Yes	No	No	Internal validation set
198	Female	≥65	＜3	≥25kg/m2	No	No	No	No	No	No	Yes	Open surgery	General anesthesia	＜270min	＜100ml	No	No	Yes	No	No	Yes	＜30g/L	≥30g/L	Orthopedic surgery	≥36℃	＜40	Yes	Yes	No	No	Internal validation set
199	Female	≥65	＜3	≥25kg/m2	No	No	Yes	No	No	No	No	Open surgery	General anesthesia	≥270min	＜100ml	Yes	No	Yes	No	Yes	Yes	＜30g/L	≥30g/L	Gastrointestinal surgery	≥36℃	＜40	No	Yes	Yes	No	Internal validation set
200	Male	≥65	＜3	≥25kg/m2	No	Yes	No	No	No	No	No	Open surgery	Non-general anesthesia	≥270min	≥100ml	No	Yes	No	No	Yes	Yes	≥30g/L	≥30g/L	Gastrointestinal surgery	＜36℃	＜40	No	Yes	Yes	No	Internal validation set
201	Female	≥65	＜3	≥25kg/m2	No	No	No	No	No	Yes	No	Open surgery	Non-general anesthesia	＜270min	≥100ml	Yes	No	Yes	No	No	No	≥30g/L	≥30g/L	Urological surgery	＜36℃	≥40	Yes	No	Yes	No	Internal validation set
202	Female	≥65	≥3	≥25kg/m2	No	No	Yes	No	No	No	No	Open surgery	Non-general anesthesia	＜270min	≥100ml	Yes	No	No	No	Yes	No	＜30g/L	≥30g/L	Other surgery	＜36℃	≥40	No	Yes	No	No	Internal validation set
203	Female	≥65	＜3	≥25kg/m2	No	No	Yes	No	Yes	No	No	Open surgery	General anesthesia	≥270min	≥100ml	Yes	No	No	No	Yes	Yes	＜30g/L	≥30g/L	Urological surgery	≥36℃	≥40	Yes	Yes	No	No	Internal validation set
204	Female	＜65	＜3	＜25kg/m2	No	No	Yes	No	No	No	No	Open surgery	Non-general anesthesia	＜270min	≥100ml	Yes	Yes	No	No	Yes	Yes	＜30g/L	＜30g/L	Urological surgery	≥36℃	＜40	No	No	No	No	Internal validation set
205	Male	＜65	＜3	＜25kg/m2	No	Yes	Yes	No	No	Yes	No	Laparoscopic surgery	General anesthesia	≥270min	＜100ml	Yes	Yes	No	No	Yes	No	≥30g/L	≥30g/L	Orthopedic surgery	≥36℃	≥40	No	Yes	Yes	No	Internal validation set
206	Female	＜65	＜3	＜25kg/m2	No	No	No	Yes	No	Yes	No	Laparoscopic surgery	Non-general anesthesia	＜270min	＜100ml	Yes	No	No	No	No	No	≥30g/L	＜30g/L	Gastrointestinal surgery	≥36℃	＜40	No	No	No	No	Internal validation set
207	Female	≥65	＜3	≥25kg/m2	No	No	No	No	No	Yes	Yes	Open surgery	Non-general anesthesia	＜270min	＜100ml	Yes	Yes	No	No	No	No	≥30g/L	＜30g/L	Urological surgery	＜36℃	＜40	No	Yes	No	No	Internal validation set
208	Female	≥65	＜3	＜25kg/m2	No	No	No	Yes	No	No	No	Laparoscopic surgery	General anesthesia	≥270min	＜100ml	No	No	No	No	Yes	Yes	＜30g/L	≥30g/L	Urological surgery	≥36℃	≥40	No	Yes	No	No	Internal validation set
209	Male	≥65	＜3	≥25kg/m2	No	No	No	No	No	No	No	Open surgery	Non-general anesthesia	≥270min	＜100ml	No	No	No	No	Yes	No	≥30g/L	≥30g/L	Other surgery	＜36℃	＜40	No	No	Yes	No	Internal validation set
210	Female	≥65	＜3	＜25kg/m2	No	No	No	No	No	No	No	Open surgery	Non-general anesthesia	＜270min	≥100ml	Yes	Yes	No	No	Yes	Yes	≥30g/L	≥30g/L	Cardiovascular surgery	＜36℃	＜40	Yes	Yes	No	No	Internal validation set
211	Male	≥65	＜3	≥25kg/m2	No	No	Yes	No	No	Yes	Yes	Open surgery	Non-general anesthesia	≥270min	≥100ml	Yes	Yes	Yes	No	Yes	Yes	＜30g/L	≥30g/L	Gastrointestinal surgery	＜36℃	＜40	Yes	No	Yes	No	Internal validation set
212	Male	＜65	＜3	＜25kg/m2	No	No	Yes	Yes	No	No	Yes	Laparoscopic surgery	General anesthesia	≥270min	＜100ml	Yes	No	Yes	No	Yes	Yes	＜30g/L	≥30g/L	Gastrointestinal surgery	＜36℃	＜40	No	No	Yes	No	Internal validation set
213	Male	≥65	≥3	≥25kg/m2	No	No	Yes	No	No	Yes	No	Laparoscopic surgery	General anesthesia	＜270min	≥100ml	Yes	Yes	No	No	No	Yes	≥30g/L	≥30g/L	Other surgery	＜36℃	≥40	No	No	Yes	No	Internal validation set
214	Male	≥65	＜3	≥25kg/m2	No	No	No	No	No	Yes	Yes	Open surgery	Non-general anesthesia	≥270min	≥100ml	Yes	Yes	Yes	No	Yes	Yes	≥30g/L	≥30g/L	Urological surgery	＜36℃	≥40	No	No	Yes	No	Internal validation set
215	Female	≥65	＜3	≥25kg/m2	No	No	No	Yes	No	Yes	Yes	Laparoscopic surgery	Non-general anesthesia	＜270min	＜100ml	Yes	No	No	No	Yes	Yes	＜30g/L	≥30g/L	Gastrointestinal surgery	≥36℃	＜40	Yes	Yes	No	No	Internal validation set
216	Female	≥65	＜3	≥25kg/m2	No	No	Yes	No	No	Yes	No	Open surgery	Non-general anesthesia	＜270min	≥100ml	Yes	Yes	No	Yes	No	Yes	＜30g/L	＜30g/L	Gastrointestinal surgery	≥36℃	＜40	No	No	Yes	No	Internal validation set
217	Male	≥65	＜3	≥25kg/m2	No	Yes	No	No	Yes	Yes	Yes	Open surgery	General anesthesia	＜270min	＜100ml	No	No	Yes	No	Yes	Yes	≥30g/L	＜30g/L	Gastrointestinal surgery	≥36℃	≥40	No	Yes	Yes	No	Internal validation set
218	Male	≥65	＜3	≥25kg/m2	No	Yes	Yes	Yes	No	Yes	Yes	Laparoscopic surgery	General anesthesia	≥270min	＜100ml	No	No	Yes	No	No	No	＜30g/L	＜30g/L	Other surgery	＜36℃	＜40	No	No	Yes	No	Internal validation set
219	Female	≥65	≥3	≥25kg/m2	No	No	No	Yes	No	Yes	No	Laparoscopic surgery	Non-general anesthesia	＜270min	＜100ml	Yes	No	No	No	No	Yes	≥30g/L	≥30g/L	Cardiovascular surgery	≥36℃	≥40	Yes	No	No	No	Internal validation set
220	Female	≥65	＜3	≥25kg/m2	No	No	No	No	No	No	Yes	Open surgery	Non-general anesthesia	＜270min	＜100ml	No	No	Yes	No	Yes	Yes	＜30g/L	＜30g/L	Gastrointestinal surgery	≥36℃	≥40	No	Yes	No	No	Internal validation set
221	Female	≥65	＜3	≥25kg/m2	No	No	No	Yes	No	Yes	No	Laparoscopic surgery	General anesthesia	＜270min	≥100ml	Yes	No	Yes	No	No	No	≥30g/L	＜30g/L	Urological surgery	＜36℃	＜40	Yes	No	No	No	Internal validation set
222	Female	＜65	＜3	＜25kg/m2	No	No	No	Yes	No	Yes	No	Laparoscopic surgery	General anesthesia	＜270min	＜100ml	Yes	No	No	No	No	Yes	≥30g/L	＜30g/L	Other surgery	≥36℃	＜40	Yes	Yes	No	No	Internal validation set
223	Female	＜65	＜3	＜25kg/m2	No	No	Yes	No	No	No	No	Open surgery	General anesthesia	＜270min	≥100ml	No	No	Yes	Yes	No	Yes	＜30g/L	＜30g/L	Other surgery	≥36℃	＜40	Yes	Yes	Yes	No	Internal validation set
224	Male	＜65	＜3	＜25kg/m2	No	No	No	Yes	Yes	No	Yes	Laparoscopic surgery	General anesthesia	＜270min	＜100ml	No	Yes	No	No	No	No	≥30g/L	≥30g/L	Cardiovascular surgery	≥36℃	＜40	Yes	No	Yes	No	Internal validation set
225	Male	≥65	＜3	≥25kg/m2	No	Yes	No	No	No	No	Yes	Open surgery	General anesthesia	＜270min	＜100ml	No	Yes	No	No	No	No	≥30g/L	≥30g/L	Gastrointestinal surgery	＜36℃	≥40	Yes	No	No	No	Internal validation set
226	Male	≥65	＜3	≥25kg/m2	No	No	No	No	No	No	No	Open surgery	Non-general anesthesia	＜270min	＜100ml	No	No	No	Yes	Yes	No	＜30g/L	＜30g/L	Gastrointestinal surgery	≥36℃	＜40	No	No	No	No	Internal validation set
227	Female	≥65	＜3	≥25kg/m2	No	No	Yes	No	No	No	No	Open surgery	General anesthesia	＜270min	≥100ml	No	Yes	No	Yes	Yes	Yes	＜30g/L	≥30g/L	Urological surgery	≥36℃	＜40	Yes	No	Yes	No	Internal validation set
228	Male	≥65	≥3	≥25kg/m2	No	No	No	No	No	Yes	No	Laparoscopic surgery	Non-general anesthesia	＜270min	＜100ml	No	No	No	No	Yes	Yes	≥30g/L	≥30g/L	Orthopedic surgery	＜36℃	＜40	Yes	Yes	Yes	No	Internal validation set
229	Female	≥65	≥3	≥25kg/m2	No	No	Yes	Yes	No	No	No	Laparoscopic surgery	General anesthesia	＜270min	≥100ml	No	No	No	Yes	Yes	No	＜30g/L	≥30g/L	Gastrointestinal surgery	≥36℃	≥40	Yes	No	Yes	No	Internal validation set
230	Female	＜65	＜3	＜25kg/m2	No	No	No	No	No	No	No	Open surgery	Non-general anesthesia	＜270min	≥100ml	No	No	No	Yes	Yes	Yes	≥30g/L	≥30g/L	Gastrointestinal surgery	＜36℃	＜40	No	Yes	No	No	Internal validation set
231	Female	＜65	＜3	＜25kg/m2	No	No	No	Yes	No	No	No	Laparoscopic surgery	General anesthesia	＜270min	＜100ml	No	No	Yes	No	No	Yes	＜30g/L	≥30g/L	Gastrointestinal surgery	≥36℃	＜40	No	No	No	No	Internal validation set
232	Male	＜65	＜3	＜25kg/m2	No	No	Yes	No	No	Yes	Yes	Open surgery	General anesthesia	＜270min	≥100ml	No	No	Yes	Yes	Yes	Yes	≥30g/L	≥30g/L	Gastrointestinal surgery	≥36℃	≥40	Yes	Yes	No	No	Internal validation set
233	Male	＜65	＜3	＜25kg/m2	No	No	Yes	No	No	No	Yes	Open surgery	Non-general anesthesia	＜270min	＜100ml	No	No	No	No	No	No	＜30g/L	＜30g/L	Cardiovascular surgery	＜36℃	＜40	No	Yes	Yes	No	Internal validation set
234	Female	＜65	＜3	＜25kg/m2	No	No	Yes	No	No	No	No	Laparoscopic surgery	General anesthesia	＜270min	≥100ml	No	No	Yes	No	No	No	＜30g/L	≥30g/L	Orthopedic surgery	＜36℃	≥40	No	No	Yes	No	Internal validation set
235	Female	＜65	＜3	＜25kg/m2	No	No	Yes	Yes	No	No	Yes	Laparoscopic surgery	General anesthesia	＜270min	≥100ml	No	No	No	No	Yes	Yes	≥30g/L	＜30g/L	Gastrointestinal surgery	≥36℃	＜40	Yes	Yes	Yes	No	Internal validation set
236	Female	≥65	＜3	≥25kg/m2	No	No	No	No	No	No	Yes	Open surgery	General anesthesia	＜270min	≥100ml	No	Yes	No	No	Yes	No	≥30g/L	≥30g/L	Orthopedic surgery	≥36℃	≥40	Yes	Yes	No	No	Internal validation set
237	Male	≥65	＜3	≥25kg/m2	No	Yes	No	Yes	Yes	No	No	Laparoscopic surgery	General anesthesia	≥270min	≥100ml	No	Yes	No	No	No	Yes	＜30g/L	≥30g/L	Cardiovascular surgery	＜36℃	＜40	Yes	No	Yes	No	Internal validation set
238	Female	≥65	≥3	≥25kg/m2	No	No	No	Yes	No	No	Yes	Laparoscopic surgery	General anesthesia	≥270min	＜100ml	No	No	No	No	Yes	Yes	＜30g/L	≥30g/L	Orthopedic surgery	＜36℃	≥40	No	Yes	Yes	No	Internal validation set
239	Female	≥65	＜3	≥25kg/m2	No	No	No	No	No	No	No	Open surgery	Non-general anesthesia	≥270min	＜100ml	No	Yes	No	No	No	Yes	≥30g/L	＜30g/L	Orthopedic surgery	＜36℃	＜40	Yes	Yes	No	No	Internal validation set
240	Female	≥65	＜3	≥25kg/m2	No	No	Yes	Yes	No	No	Yes	Laparoscopic surgery	General anesthesia	≥270min	＜100ml	No	No	Yes	Yes	No	No	＜30g/L	≥30g/L	Cardiovascular surgery	≥36℃	≥40	No	Yes	Yes	No	Internal validation set
241	Female	＜65	＜3	＜25kg/m2	No	No	No	No	No	No	Yes	Open surgery	General anesthesia	≥270min	≥100ml	No	No	Yes	Yes	No	Yes	＜30g/L	≥30g/L	Urological surgery	≥36℃	≥40	No	Yes	No	No	Internal validation set
242	Male	≥65	≥3	≥25kg/m2	No	Yes	No	No	No	Yes	No	Open surgery	Non-general anesthesia	＜270min	≥100ml	No	Yes	No	No	Yes	Yes	≥30g/L	＜30g/L	Cardiovascular surgery	≥36℃	≥40	No	No	No	No	Internal validation set
243	Female	≥65	≥3	≥25kg/m2	No	No	Yes	No	No	No	Yes	Open surgery	General anesthesia	≥270min	≥100ml	No	Yes	No	Yes	Yes	Yes	≥30g/L	＜30g/L	Urological surgery	≥36℃	＜40	Yes	Yes	No	No	Internal validation set
244	Female	≥65	＜3	≥25kg/m2	No	No	Yes	No	No	Yes	Yes	Open surgery	General anesthesia	＜270min	≥100ml	No	No	No	No	Yes	No	＜30g/L	≥30g/L	Other surgery	＜36℃	＜40	Yes	Yes	Yes	No	Internal validation set
245	Female	≥65	≥3	≥25kg/m2	No	No	Yes	No	Yes	Yes	No	Open surgery	General anesthesia	≥270min	≥100ml	No	Yes	No	No	No	Yes	≥30g/L	＜30g/L	Orthopedic surgery	＜36℃	＜40	Yes	Yes	No	No	Internal validation set
246	Female	≥65	≥3	≥25kg/m2	No	No	Yes	No	No	No	Yes	Open surgery	General anesthesia	＜270min	＜100ml	Yes	Yes	No	No	Yes	Yes	≥30g/L	≥30g/L	Gastrointestinal surgery	≥36℃	≥40	No	Yes	Yes	No	Internal validation set
247	Female	≥65	＜3	＜25kg/m2	No	No	Yes	No	No	Yes	No	Open surgery	Non-general anesthesia	≥270min	＜100ml	No	No	No	No	Yes	No	＜30g/L	≥30g/L	Gastrointestinal surgery	＜36℃	＜40	No	No	No	No	Internal validation set
248	Female	≥65	≥3	≥25kg/m2	No	No	Yes	Yes	No	No	No	Laparoscopic surgery	Non-general anesthesia	≥270min	＜100ml	Yes	Yes	Yes	No	No	No	＜30g/L	＜30g/L	Gastrointestinal surgery	＜36℃	＜40	No	Yes	No	No	Internal validation set
249	Male	≥65	≥3	≥25kg/m2	Yes	No	Yes	Yes	No	No	No	Laparoscopic surgery	Non-general anesthesia	＜270min	＜100ml	Yes	No	Yes	No	No	No	＜30g/L	＜30g/L	Cardiovascular surgery	≥36℃	≥40	No	No	Yes	No	Internal validation set
250	Male	≥65	＜3	＜25kg/m2	Yes	No	Yes	No	Yes	No	Yes	Open surgery	Non-general anesthesia	＜270min	＜100ml	Yes	Yes	Yes	No	Yes	No	＜30g/L	＜30g/L	Other surgery	＜36℃	＜40	No	Yes	Yes	No	Internal validation set
251	Female	＜65	＜3	＜25kg/m2	No	No	No	Yes	No	Yes	Yes	Laparoscopic surgery	General anesthesia	≥270min	＜100ml	No	Yes	No	No	No	No	＜30g/L	＜30g/L	Gastrointestinal surgery	＜36℃	≥40	Yes	Yes	Yes	No	Internal validation set
252	Male	＜65	＜3	＜25kg/m2	Yes	No	No	No	No	No	No	Open surgery	General anesthesia	＜270min	≥100ml	Yes	Yes	No	Yes	No	Yes	≥30g/L	≥30g/L	Cardiovascular surgery	≥36℃	≥40	Yes	No	No	No	Internal validation set
253	Male	＜65	＜3	＜25kg/m2	Yes	No	No	No	No	No	Yes	Open surgery	Non-general anesthesia	≥270min	＜100ml	Yes	Yes	No	Yes	No	Yes	＜30g/L	≥30g/L	Gastrointestinal surgery	＜36℃	≥40	Yes	Yes	Yes	No	Internal validation set
254	Male	≥65	＜3	≥25kg/m2	No	Yes	Yes	No	No	No	No	Open surgery	General anesthesia	＜270min	＜100ml	Yes	Yes	No	No	No	Yes	≥30g/L	≥30g/L	Gastrointestinal surgery	≥36℃	≥40	Yes	No	No	No	Internal validation set
255	Female	≥65	＜3	≥25kg/m2	No	No	Yes	No	No	No	No	Open surgery	General anesthesia	＜270min	≥100ml	Yes	No	No	Yes	No	No	≥30g/L	≥30g/L	Orthopedic surgery	≥36℃	≥40	Yes	Yes	Yes	No	Internal validation set
256	Male	≥65	＜3	＜25kg/m2	Yes	No	Yes	No	No	No	Yes	Open surgery	Non-general anesthesia	≥270min	＜100ml	Yes	No	No	No	Yes	No	＜30g/L	＜30g/L	Gastrointestinal surgery	≥36℃	＜40	No	Yes	Yes	No	Internal validation set
257	Male	≥65	＜3	＜25kg/m2	Yes	No	Yes	No	No	No	Yes	Open surgery	Non-general anesthesia	≥270min	＜100ml	No	No	Yes	No	No	No	≥30g/L	＜30g/L	Urological surgery	≥36℃	＜40	No	Yes	Yes	No	Internal validation set
258	Male	≥65	≥3	≥25kg/m2	Yes	No	No	No	No	No	No	Open surgery	General anesthesia	＜270min	≥100ml	Yes	No	Yes	Yes	No	No	≥30g/L	≥30g/L	Gastrointestinal surgery	≥36℃	≥40	No	Yes	No	No	Internal validation set
259	Female	＜65	＜3	＜25kg/m2	No	No	Yes	No	No	No	Yes	Open surgery	Non-general anesthesia	≥270min	≥100ml	No	No	No	Yes	Yes	Yes	≥30g/L	≥30g/L	Gastrointestinal surgery	＜36℃	＜40	Yes	No	No	No	Internal validation set
260	Female	＜65	＜3	＜25kg/m2	No	No	Yes	Yes	No	No	Yes	Laparoscopic surgery	Non-general anesthesia	≥270min	≥100ml	Yes	No	Yes	No	Yes	No	≥30g/L	≥30g/L	Gastrointestinal surgery	＜36℃	≥40	No	No	No	No	Internal validation set
261	Female	＜65	＜3	≥25kg/m2	No	No	Yes	Yes	No	No	No	Laparoscopic surgery	General anesthesia	＜270min	≥100ml	Yes	No	No	Yes	No	No	≥30g/L	≥30g/L	Gastrointestinal surgery	＜36℃	＜40	No	No	Yes	No	Internal validation set
262	Male	＜65	≥3	≥25kg/m2	No	No	Yes	No	No	Yes	No	Open surgery	General anesthesia	≥270min	≥100ml	Yes	No	No	Yes	Yes	Yes	＜30g/L	≥30g/L	Urological surgery	＜36℃	≥40	Yes	Yes	Yes	No	Internal validation set
263	Female	＜65	≥3	＜25kg/m2	No	No	No	Yes	No	Yes	No	Laparoscopic surgery	Non-general anesthesia	＜270min	＜100ml	No	No	Yes	No	Yes	No	≥30g/L	＜30g/L	Gastrointestinal surgery	＜36℃	＜40	Yes	No	No	No	Internal validation set
264	Female	≥65	＜3	≥25kg/m2	No	No	No	No	No	Yes	No	Open surgery	General anesthesia	＜270min	＜100ml	Yes	No	Yes	Yes	No	Yes	≥30g/L	＜30g/L	Urological surgery	＜36℃	≥40	Yes	Yes	No	No	Internal validation set
265	Male	≥65	≥3	≥25kg/m2	No	No	No	No	No	Yes	No	Open surgery	General anesthesia	＜270min	＜100ml	Yes	No	No	No	Yes	Yes	≥30g/L	≥30g/L	Other surgery	≥36℃	≥40	No	Yes	No	No	Internal validation set
266	Female	≥65	≥3	≥25kg/m2	No	Yes	No	Yes	No	Yes	No	Laparoscopic surgery	Non-general anesthesia	≥270min	≥100ml	Yes	No	No	Yes	No	Yes	＜30g/L	≥30g/L	Gastrointestinal surgery	＜36℃	＜40	Yes	No	No	No	Internal validation set
267	Female	≥65	＜3	＜25kg/m2	No	No	Yes	Yes	Yes	No	No	Laparoscopic surgery	General anesthesia	＜270min	≥100ml	No	Yes	No	Yes	No	No	＜30g/L	＜30g/L	Orthopedic surgery	≥36℃	≥40	No	Yes	No	No	Internal validation set
268	Female	≥65	＜3	＜25kg/m2	Yes	No	No	No	No	Yes	No	Open surgery	Non-general anesthesia	＜270min	≥100ml	Yes	Yes	No	No	No	Yes	≥30g/L	≥30g/L	Urological surgery	≥36℃	＜40	Yes	Yes	No	No	Internal validation set
269	Male	＜65	＜3	＜25kg/m2	No	No	Yes	Yes	No	No	No	Laparoscopic surgery	Non-general anesthesia	＜270min	≥100ml	Yes	Yes	No	No	No	No	＜30g/L	＜30g/L	Gastrointestinal surgery	≥36℃	＜40	Yes	Yes	Yes	No	Internal validation set
270	Female	≥65	＜3	≥25kg/m2	No	No	Yes	Yes	No	Yes	No	Laparoscopic surgery	General anesthesia	＜270min	≥100ml	Yes	Yes	No	No	No	No	≥30g/L	≥30g/L	Gastrointestinal surgery	＜36℃	≥40	No	Yes	No	No	Internal validation set
271	Female	≥65	＜3	＜25kg/m2	No	No	No	No	No	No	No	Open surgery	General anesthesia	＜270min	＜100ml	Yes	No	No	No	No	Yes	＜30g/L	＜30g/L	Gastrointestinal surgery	＜36℃	≥40	Yes	Yes	Yes	No	Internal validation set
272	Female	≥65	＜3	＜25kg/m2	No	No	Yes	Yes	No	No	No	Laparoscopic surgery	General anesthesia	＜270min	＜100ml	Yes	No	No	No	No	Yes	＜30g/L	≥30g/L	Other surgery	＜36℃	＜40	Yes	Yes	No	No	Internal validation set
273	Male	≥65	＜3	≥25kg/m2	Yes	No	No	No	No	No	No	Open surgery	Non-general anesthesia	＜270min	＜100ml	No	No	No	No	Yes	Yes	＜30g/L	＜30g/L	Gastrointestinal surgery	＜36℃	≥40	No	No	No	No	Internal validation set
274	Female	≥65	＜3	≥25kg/m2	No	No	No	No	No	No	No	Open surgery	Non-general anesthesia	＜270min	＜100ml	No	Yes	No	No	Yes	Yes	＜30g/L	＜30g/L	Orthopedic surgery	≥36℃	＜40	No	No	No	No	Internal validation set
275	Female	≥65	≥3	＜25kg/m2	No	No	No	No	No	No	No	Open surgery	Non-general anesthesia	＜270min	＜100ml	No	Yes	No	No	No	Yes	≥30g/L	＜30g/L	Gastrointestinal surgery	＜36℃	＜40	Yes	No	Yes	No	Internal validation set
276	Female	≥65	＜3	＜25kg/m2	No	No	No	No	Yes	No	No	Open surgery	General anesthesia	＜270min	＜100ml	No	Yes	No	No	No	No	＜30g/L	＜30g/L	Other surgery	≥36℃	＜40	Yes	No	Yes	No	Internal validation set
277	Male	≥65	＜3	≥25kg/m2	No	No	No	No	No	No	No	Open surgery	General anesthesia	＜270min	＜100ml	No	Yes	Yes	No	No	No	＜30g/L	≥30g/L	Urological surgery	＜36℃	＜40	No	Yes	Yes	No	Internal validation set
278	Male	≥65	≥3	≥25kg/m2	Yes	Yes	Yes	No	No	No	No	Open surgery	Non-general anesthesia	＜270min	＜100ml	No	Yes	Yes	No	Yes	Yes	≥30g/L	＜30g/L	Orthopedic surgery	＜36℃	≥40	Yes	Yes	Yes	No	Internal validation set
279	Male	＜65	＜3	＜25kg/m2	No	Yes	Yes	No	No	No	No	Open surgery	General anesthesia	＜270min	＜100ml	No	No	No	No	No	Yes	≥30g/L	≥30g/L	Urological surgery	≥36℃	＜40	No	Yes	Yes	No	Internal validation set
280	Female	＜65	＜3	＜25kg/m2	No	No	Yes	Yes	No	No	No	Laparoscopic surgery	Non-general anesthesia	＜270min	＜100ml	No	No	Yes	No	Yes	No	≥30g/L	≥30g/L	Cardiovascular surgery	＜36℃	＜40	No	Yes	Yes	No	Internal validation set
281	Male	＜65	＜3	＜25kg/m2	No	No	No	Yes	No	No	No	Laparoscopic surgery	Non-general anesthesia	＜270min	＜100ml	No	No	No	No	Yes	No	≥30g/L	＜30g/L	Urological surgery	＜36℃	＜40	Yes	No	No	No	Internal validation set
282	Male	≥65	≥3	＜25kg/m2	Yes	No	No	No	No	No	Yes	Open surgery	General anesthesia	＜270min	＜100ml	No	No	No	No	Yes	No	≥30g/L	≥30g/L	Gastrointestinal surgery	＜36℃	＜40	Yes	No	Yes	No	Internal validation set
283	Male	≥65	＜3	＜25kg/m2	Yes	No	Yes	Yes	No	Yes	Yes	Laparoscopic surgery	General anesthesia	＜270min	≥100ml	No	No	No	No	No	Yes	＜30g/L	≥30g/L	Orthopedic surgery	＜36℃	＜40	No	No	Yes	No	Internal validation set
284	Female	≥65	＜3	≥25kg/m2	No	No	No	No	No	No	No	Open surgery	Non-general anesthesia	≥270min	≥100ml	No	No	No	No	No	No	＜30g/L	≥30g/L	Orthopedic surgery	≥36℃	≥40	Yes	Yes	No	No	Internal validation set
285	Male	≥65	＜3	≥25kg/m2	Yes	No	Yes	No	No	Yes	Yes	Open surgery	General anesthesia	≥270min	≥100ml	No	No	No	No	Yes	Yes	＜30g/L	≥30g/L	Gastrointestinal surgery	＜36℃	＜40	Yes	No	No	No	Internal validation set
286	Male	≥65	＜3	＜25kg/m2	Yes	Yes	No	No	No	No	Yes	Open surgery	Non-general anesthesia	≥270min	≥100ml	No	No	No	Yes	Yes	Yes	≥30g/L	＜30g/L	Gastrointestinal surgery	≥36℃	＜40	Yes	Yes	Yes	No	Internal validation set
287	Female	＜65	≥3	＜25kg/m2	No	No	No	No	No	No	No	Open surgery	General anesthesia	≥270min	＜100ml	Yes	No	No	No	No	Yes	＜30g/L	＜30g/L	Urological surgery	≥36℃	≥40	Yes	Yes	Yes	No	Internal validation set
288	Female	＜65	＜3	≥25kg/m2	No	No	No	No	Yes	No	Yes	Open surgery	Non-general anesthesia	≥270min	＜100ml	Yes	No	No	No	No	No	≥30g/L	＜30g/L	Cardiovascular surgery	＜36℃	＜40	No	No	No	No	Internal validation set
289	Male	＜65	＜3	＜25kg/m2	Yes	No	No	No	No	No	No	Open surgery	General anesthesia	＜270min	＜100ml	No	Yes	Yes	No	No	Yes	≥30g/L	≥30g/L	Gastrointestinal surgery	＜36℃	≥40	Yes	No	Yes	No	Internal validation set
290	Male	≥65	＜3	＜25kg/m2	Yes	No	Yes	No	No	No	Yes	Open surgery	General anesthesia	≥270min	≥100ml	Yes	Yes	Yes	Yes	No	No	≥30g/L	≥30g/L	Other surgery	＜36℃	≥40	No	Yes	No	No	Internal validation set
291	Male	≥65	≥3	＜25kg/m2	Yes	No	No	No	No	No	Yes	Open surgery	General anesthesia	＜270min	≥100ml	No	No	No	No	No	Yes	≥30g/L	＜30g/L	Gastrointestinal surgery	≥36℃	≥40	No	No	No	No	Internal validation set
292	Female	≥65	＜3	≥25kg/m2	No	No	No	No	No	No	No	Open surgery	General anesthesia	≥270min	≥100ml	No	Yes	Yes	No	No	Yes	＜30g/L	≥30g/L	Urological surgery	≥36℃	≥40	Yes	Yes	No	No	Internal validation set
293	Female	≥65	＜3	≥25kg/m2	No	No	No	Yes	Yes	No	Yes	Laparoscopic surgery	General anesthesia	＜270min	≥100ml	Yes	No	Yes	Yes	Yes	Yes	≥30g/L	≥30g/L	Cardiovascular surgery	≥36℃	＜40	No	Yes	No	No	Internal validation set
294	Female	≥65	＜3	＜25kg/m2	No	No	Yes	Yes	No	No	Yes	Laparoscopic surgery	Non-general anesthesia	≥270min	≥100ml	Yes	No	No	Yes	No	No	＜30g/L	＜30g/L	Cardiovascular surgery	≥36℃	＜40	Yes	Yes	No	No	Internal validation set
295	Female	＜65	＜3	＜25kg/m2	No	No	No	No	No	Yes	No	Open surgery	Non-general anesthesia	≥270min	＜100ml	No	No	Yes	No	Yes	Yes	≥30g/L	≥30g/L	Orthopedic surgery	＜36℃	≥40	No	No	Yes	No	Internal validation set
296	Female	≥65	≥3	≥25kg/m2	No	No	Yes	Yes	No	Yes	Yes	Laparoscopic surgery	Non-general anesthesia	＜270min	＜100ml	Yes	No	No	No	No	No	＜30g/L	≥30g/L	Gastrointestinal surgery	＜36℃	≥40	No	Yes	Yes	No	Internal validation set
297	Female	≥65	＜3	＜25kg/m2	No	No	No	No	Yes	No	No	Open surgery	General anesthesia	＜270min	＜100ml	Yes	No	No	No	No	Yes	≥30g/L	≥30g/L	Gastrointestinal surgery	＜36℃	≥40	Yes	Yes	No	No	Internal validation set
298	Female	≥65	＜3	＜25kg/m2	No	No	No	No	Yes	No	No	Open surgery	Non-general anesthesia	≥270min	＜100ml	No	Yes	No	No	No	Yes	＜30g/L	≥30g/L	Gastrointestinal surgery	≥36℃	＜40	Yes	No	No	No	Internal validation set
299	Male	≥65	＜3	≥25kg/m2	Yes	No	Yes	Yes	No	No	No	Laparoscopic surgery	Non-general anesthesia	＜270min	＜100ml	Yes	Yes	Yes	No	No	No	＜30g/L	≥30g/L	Gastrointestinal surgery	≥36℃	≥40	Yes	Yes	Yes	No	Internal validation set
300	Male	≥65	≥3	≥25kg/m2	Yes	No	Yes	Yes	No	No	Yes	Laparoscopic surgery	General anesthesia	≥270min	＜100ml	No	Yes	Yes	No	Yes	No	≥30g/L	≥30g/L	Orthopedic surgery	＜36℃	＜40	No	No	No	No	Internal validation set
301	Female	≥65	≥3	＜25kg/m2	No	Yes	Yes	No	No	No	Yes	Open surgery	Non-general anesthesia	＜270min	＜100ml	No	Yes	No	No	Yes	No	＜30g/L	≥30g/L	Urological surgery	＜36℃	≥40	No	Yes	Yes	No	Internal validation set
302	Male	≥65	＜3	≥25kg/m2	Yes	No	Yes	Yes	No	No	No	Laparoscopic surgery	General anesthesia	＜270min	＜100ml	No	Yes	Yes	No	No	Yes	≥30g/L	＜30g/L	Other surgery	≥36℃	≥40	No	No	Yes	No	Internal validation set
303	Male	≥65	≥3	≥25kg/m2	Yes	No	No	Yes	Yes	Yes	Yes	Laparoscopic surgery	Non-general anesthesia	≥270min	＜100ml	Yes	No	No	No	Yes	Yes	＜30g/L	＜30g/L	Orthopedic surgery	＜36℃	≥40	No	Yes	Yes	No	Internal validation set
304	Female	≥65	≥3	≥25kg/m2	No	No	No	No	No	No	No	Open surgery	General anesthesia	≥270min	＜100ml	Yes	No	No	No	No	Yes	＜30g/L	≥30g/L	Urological surgery	≥36℃	＜40	Yes	No	Yes	No	Internal validation set
305	Female	＜65	＜3	＜25kg/m2	No	No	No	Yes	No	No	No	Laparoscopic surgery	General anesthesia	＜270min	≥100ml	No	No	Yes	Yes	No	No	≥30g/L	＜30g/L	Cardiovascular surgery	≥36℃	≥40	Yes	No	Yes	No	Internal validation set
306	Male	＜65	＜3	＜25kg/m2	Yes	No	Yes	No	No	No	Yes	Open surgery	General anesthesia	≥270min	≥100ml	Yes	Yes	No	Yes	No	Yes	≥30g/L	≥30g/L	Cardiovascular surgery	＜36℃	≥40	Yes	No	Yes	No	Internal validation set
307	Male	＜65	≥3	＜25kg/m2	Yes	No	Yes	No	No	No	Yes	Open surgery	General anesthesia	≥270min	＜100ml	No	Yes	No	No	No	Yes	≥30g/L	＜30g/L	Orthopedic surgery	＜36℃	＜40	No	Yes	No	No	Internal validation set
308	Male	≥65	≥3	≥25kg/m2	Yes	No	Yes	No	Yes	No	No	Open surgery	General anesthesia	＜270min	≥100ml	No	Yes	No	Yes	No	Yes	≥30g/L	＜30g/L	Orthopedic surgery	≥36℃	＜40	No	Yes	Yes	No	Internal validation set
309	Female	≥65	≥3	≥25kg/m2	No	No	No	No	Yes	No	Yes	Open surgery	Non-general anesthesia	≥270min	＜100ml	No	Yes	No	No	Yes	No	≥30g/L	＜30g/L	Other surgery	＜36℃	＜40	No	No	No	No	Internal validation set
310	Female	≥65	＜3	≥25kg/m2	No	No	Yes	No	No	No	No	Open surgery	General anesthesia	＜270min	＜100ml	No	Yes	No	No	Yes	Yes	≥30g/L	＜30g/L	Orthopedic surgery	＜36℃	≥40	Yes	No	No	No	Internal validation set
311	Male	≥65	≥3	≥25kg/m2	Yes	No	No	No	No	No	No	Open surgery	Non-general anesthesia	＜270min	＜100ml	No	No	Yes	No	Yes	No	≥30g/L	≥30g/L	Gastrointestinal surgery	＜36℃	≥40	Yes	No	No	No	Internal validation set
312	Male	≥65	＜3	≥25kg/m2	Yes	No	No	No	No	No	No	Open surgery	Non-general anesthesia	＜270min	＜100ml	No	No	No	No	Yes	Yes	≥30g/L	＜30g/L	Other surgery	＜36℃	≥40	Yes	No	Yes	No	Internal validation set
313	Female	＜65	＜3	＜25kg/m2	No	Yes	No	Yes	No	No	No	Laparoscopic surgery	General anesthesia	≥270min	＜100ml	No	No	No	No	Yes	No	＜30g/L	≥30g/L	Cardiovascular surgery	≥36℃	≥40	Yes	Yes	Yes	No	Internal validation set
314	Male	＜65	＜3	＜25kg/m2	Yes	Yes	No	Yes	Yes	Yes	No	Laparoscopic surgery	General anesthesia	＜270min	≥100ml	No	No	No	Yes	Yes	No	≥30g/L	＜30g/L	Urological surgery	≥36℃	＜40	Yes	Yes	Yes	No	Internal validation set
315	Male	＜65	≥3	＜25kg/m2	Yes	No	No	No	No	No	Yes	Open surgery	Non-general anesthesia	＜270min	≥100ml	Yes	No	No	Yes	Yes	Yes	＜30g/L	≥30g/L	Urological surgery	≥36℃	≥40	Yes	No	Yes	No	Internal validation set
316	Female	＜65	≥3	≥25kg/m2	No	No	No	Yes	No	No	No	Laparoscopic surgery	Non-general anesthesia	＜270min	≥100ml	No	Yes	No	No	Yes	No	≥30g/L	＜30g/L	Urological surgery	≥36℃	≥40	Yes	No	No	No	Internal validation set
317	Female	＜65	＜3	≥25kg/m2	No	No	Yes	No	No	No	Yes	Open surgery	Non-general anesthesia	＜270min	≥100ml	No	No	No	No	No	No	＜30g/L	＜30g/L	Gastrointestinal surgery	≥36℃	＜40	No	No	Yes	No	Internal validation set
318	Male	＜65	≥3	＜25kg/m2	Yes	No	No	No	No	No	Yes	Open surgery	Non-general anesthesia	＜270min	≥100ml	No	Yes	No	Yes	No	Yes	≥30g/L	＜30g/L	Urological surgery	≥36℃	＜40	No	Yes	No	No	Internal validation set
319	Male	＜65	≥3	＜25kg/m2	Yes	Yes	No	No	No	No	No	Open surgery	General anesthesia	＜270min	＜100ml	Yes	No	No	No	No	No	＜30g/L	＜30g/L	Gastrointestinal surgery	≥36℃	＜40	No	No	Yes	No	Internal validation set
320	Female	＜65	＜3	≥25kg/m2	No	No	Yes	No	Yes	No	No	Open surgery	Non-general anesthesia	≥270min	＜100ml	Yes	No	No	No	No	No	≥30g/L	＜30g/L	Urological surgery	＜36℃	＜40	Yes	No	No	No	Internal validation set
321	Male	＜65	＜3	＜25kg/m2	Yes	No	No	No	Yes	Yes	Yes	Open surgery	General anesthesia	≥270min	＜100ml	No	Yes	No	No	No	Yes	＜30g/L	≥30g/L	Urological surgery	≥36℃	＜40	Yes	No	No	No	Internal validation set
322	Male	＜65	≥3	＜25kg/m2	No	No	Yes	Yes	No	No	No	Laparoscopic surgery	General anesthesia	＜270min	≥100ml	Yes	Yes	No	Yes	No	Yes	＜30g/L	≥30g/L	Cardiovascular surgery	≥36℃	≥40	No	No	Yes	No	Internal validation set
323	Male	＜65	≥3	＜25kg/m2	Yes	No	No	Yes	No	No	No	Laparoscopic surgery	General anesthesia	≥270min	≥100ml	Yes	No	Yes	Yes	Yes	Yes	＜30g/L	＜30g/L	Urological surgery	≥36℃	≥40	No	No	No	No	Internal validation set
324	Female	＜65	≥3	≥25kg/m2	No	No	No	Yes	No	Yes	No	Open surgery	Non-general anesthesia	≥270min	≥100ml	No	Yes	Yes	No	No	Yes	＜30g/L	＜30g/L	Cardiovascular surgery	≥36℃	≥40	Yes	No	No	No	Internal validation set
325	Female	＜65	＜3	≥25kg/m2	No	No	No	No	No	No	Yes	Open surgery	General anesthesia	＜270min	≥100ml	Yes	Yes	No	Yes	No	Yes	＜30g/L	≥30g/L	Cardiovascular surgery	≥36℃	≥40	Yes	Yes	Yes	No	Internal validation set
326	Male	＜65	＜3	＜25kg/m2	Yes	No	No	Yes	No	No	No	Open surgery	General anesthesia	≥270min	≥100ml	Yes	No	Yes	Yes	Yes	No	＜30g/L	≥30g/L	Cardiovascular surgery	≥36℃	≥40	Yes	Yes	Yes	No	Internal validation set
327	Female	＜65	≥3	＜25kg/m2	No	No	Yes	Yes	No	No	No	Open surgery	Non-general anesthesia	＜270min	＜100ml	No	Yes	No	No	No	No	＜30g/L	＜30g/L	Gastrointestinal surgery	＜36℃	＜40	Yes	No	Yes	No	Internal validation set
328	Male	＜65	＜3	≥25kg/m2	Yes	No	No	Yes	No	No	No	Open surgery	Non-general anesthesia	＜270min	＜100ml	Yes	No	No	No	No	No	≥30g/L	≥30g/L	Orthopedic surgery	＜36℃	≥40	No	Yes	Yes	No	Internal validation set
329	Male	＜65	＜3	＜25kg/m2	Yes	No	No	Yes	No	No	No	Open surgery	General anesthesia	＜270min	＜100ml	No	No	No	No	No	No	＜30g/L	≥30g/L	Other surgery	≥36℃	＜40	Yes	No	No	No	Internal validation set
330	Male	≥65	＜3	＜25kg/m2	Yes	No	No	Yes	No	No	No	Laparoscopic surgery	General anesthesia	≥270min	＜100ml	No	No	No	No	No	No	≥30g/L	≥30g/L	Gastrointestinal surgery	≥36℃	＜40	Yes	No	No	No	Internal validation set
331	Female	≥65	＜3	≥25kg/m2	No	Yes	Yes	Yes	No	Yes	No	Laparoscopic surgery	General anesthesia	≥270min	＜100ml	No	No	No	No	No	No	≥30g/L	＜30g/L	Gastrointestinal surgery	≥36℃	＜40	No	Yes	Yes	No	Internal validation set
332	Female	≥65	≥3	≥25kg/m2	No	Yes	No	Yes	No	No	Yes	Laparoscopic surgery	General anesthesia	＜270min	≥100ml	Yes	No	No	Yes	No	No	≥30g/L	≥30g/L	Orthopedic surgery	＜36℃	≥40	Yes	Yes	No	No	Internal validation set
333	Female	≥65	＜3	＜25kg/m2	No	No	Yes	No	No	No	No	Open surgery	Non-general anesthesia	≥270min	＜100ml	Yes	No	Yes	No	No	No	≥30g/L	＜30g/L	Gastrointestinal surgery	≥36℃	≥40	No	No	Yes	No	Internal validation set
334	Female	≥65	＜3	＜25kg/m2	No	No	No	No	No	No	No	Open surgery	General anesthesia	＜270min	≥100ml	No	No	Yes	No	Yes	No	≥30g/L	≥30g/L	Orthopedic surgery	＜36℃	≥40	No	No	No	No	Internal validation set
335	Female	＜65	＜3	≥25kg/m2	No	No	No	No	No	No	Yes	Open surgery	Non-general anesthesia	＜270min	＜100ml	No	Yes	No	No	Yes	No	＜30g/L	＜30g/L	Gastrointestinal surgery	≥36℃	≥40	Yes	Yes	Yes	No	Internal validation set
336	Female	≥65	＜3	＜25kg/m2	No	No	Yes	No	Yes	Yes	Yes	Open surgery	Non-general anesthesia	≥270min	＜100ml	No	Yes	Yes	Yes	No	Yes	≥30g/L	≥30g/L	Gastrointestinal surgery	＜36℃	≥40	No	Yes	Yes	No	Internal validation set
337	Female	≥65	≥3	＜25kg/m2	No	No	Yes	No	No	No	No	Open surgery	General anesthesia	≥270min	≥100ml	No	Yes	No	No	Yes	Yes	＜30g/L	≥30g/L	Gastrointestinal surgery	＜36℃	≥40	Yes	No	Yes	No	Internal validation set
338	Female	≥65	＜3	＜25kg/m2	No	No	Yes	No	No	No	Yes	Open surgery	General anesthesia	＜270min	≥100ml	No	Yes	No	Yes	No	Yes	＜30g/L	≥30g/L	Orthopedic surgery	＜36℃	≥40	No	No	Yes	No	Internal validation set
339	Male	≥65	＜3	≥25kg/m2	No	Yes	Yes	Yes	No	No	No	Laparoscopic surgery	General anesthesia	＜270min	＜100ml	No	Yes	Yes	No	Yes	Yes	＜30g/L	≥30g/L	Urological surgery	＜36℃	≥40	No	No	No	No	Internal validation set
340	Male	≥65	＜3	≥25kg/m2	Yes	No	No	Yes	No	Yes	No	Laparoscopic surgery	Non-general anesthesia	＜270min	≥100ml	Yes	No	No	No	No	No	＜30g/L	≥30g/L	Orthopedic surgery	≥36℃	＜40	Yes	Yes	No	No	Internal validation set
341	Male	≥65	＜3	＜25kg/m2	Yes	No	No	No	No	No	No	Open surgery	Non-general anesthesia	＜270min	≥100ml	Yes	No	No	Yes	No	No	＜30g/L	＜30g/L	Gastrointestinal surgery	≥36℃	≥40	No	Yes	Yes	No	Internal validation set
342	Male	≥65	≥3	＜25kg/m2	Yes	No	No	Yes	No	No	No	Laparoscopic surgery	General anesthesia	＜270min	＜100ml	No	No	No	Yes	Yes	Yes	＜30g/L	≥30g/L	Gastrointestinal surgery	＜36℃	≥40	Yes	No	Yes	No	Internal validation set
343	Male	≥65	＜3	≥25kg/m2	Yes	No	No	No	No	No	Yes	Open surgery	General anesthesia	＜270min	≥100ml	Yes	Yes	No	No	No	Yes	＜30g/L	＜30g/L	Gastrointestinal surgery	＜36℃	≥40	Yes	Yes	No	No	Internal validation set
344	Male	≥65	＜3	＜25kg/m2	Yes	No	No	No	No	No	No	Open surgery	Non-general anesthesia	＜270min	＜100ml	Yes	Yes	No	Yes	No	Yes	＜30g/L	≥30g/L	Orthopedic surgery	≥36℃	＜40	Yes	No	Yes	No	Internal validation set
345	Male	＜65	＜3	＜25kg/m2	Yes	No	No	Yes	No	No	No	Laparoscopic surgery	Non-general anesthesia	＜270min	＜100ml	No	Yes	Yes	Yes	No	Yes	≥30g/L	≥30g/L	Gastrointestinal surgery	≥36℃	＜40	Yes	Yes	Yes	No	Internal validation set
346	Male	＜65	＜3	≥25kg/m2	Yes	No	No	Yes	No	No	No	Laparoscopic surgery	General anesthesia	＜270min	＜100ml	Yes	Yes	No	No	Yes	Yes	＜30g/L	＜30g/L	Gastrointestinal surgery	＜36℃	≥40	Yes	Yes	Yes	No	Internal validation set
347	Male	＜65	＜3	≥25kg/m2	Yes	No	No	No	No	No	No	Open surgery	General anesthesia	＜270min	＜100ml	No	Yes	No	No	No	Yes	＜30g/L	＜30g/L	Gastrointestinal surgery	≥36℃	≥40	No	No	No	No	Internal validation set
348	Female	≥65	≥3	＜25kg/m2	No	No	Yes	Yes	Yes	No	Yes	Open surgery	Non-general anesthesia	＜270min	＜100ml	Yes	No	Yes	No	No	Yes	≥30g/L	＜30g/L	Cardiovascular surgery	＜36℃	＜40	No	No	No	No	Internal validation set
349	Female	≥65	≥3	≥25kg/m2	No	No	Yes	Yes	No	Yes	No	Open surgery	General anesthesia	＜270min	＜100ml	Yes	No	No	No	Yes	No	≥30g/L	＜30g/L	Orthopedic surgery	＜36℃	＜40	Yes	No	No	No	Internal validation set
350	Male	≥65	≥3	≥25kg/m2	Yes	No	No	No	No	No	No	Open surgery	General anesthesia	＜270min	＜100ml	No	No	No	No	No	Yes	＜30g/L	≥30g/L	Orthopedic surgery	＜36℃	＜40	Yes	No	Yes	No	Internal validation set
351	Male	≥65	≥3	≥25kg/m2	Yes	Yes	Yes	Yes	No	No	No	Open surgery	Non-general anesthesia	＜270min	≥100ml	Yes	No	No	Yes	No	Yes	＜30g/L	≥30g/L	Other surgery	≥36℃	＜40	No	No	No	No	Internal validation set
352	Female	≥65	＜3	＜25kg/m2	No	No	No	No	No	No	No	Open surgery	General anesthesia	＜270min	≥100ml	Yes	No	Yes	Yes	No	No	≥30g/L	＜30g/L	Urological surgery	≥36℃	＜40	No	Yes	No	No	Internal validation set
353	Male	＜65	＜3	≥25kg/m2	Yes	No	No	No	No	Yes	No	Open surgery	General anesthesia	＜270min	≥100ml	No	Yes	Yes	Yes	Yes	Yes	＜30g/L	≥30g/L	Gastrointestinal surgery	≥36℃	＜40	No	No	No	No	Internal validation set
354	Female	＜65	＜3	≥25kg/m2	No	No	No	No	Yes	Yes	No	Open surgery	Non-general anesthesia	＜270min	≥100ml	Yes	No	No	No	No	Yes	≥30g/L	＜30g/L	Urological surgery	≥36℃	≥40	Yes	No	Yes	No	Internal validation set
355	Male	＜65	＜3	＜25kg/m2	Yes	No	No	No	No	No	No	Open surgery	Non-general anesthesia	＜270min	≥100ml	No	No	No	No	No	Yes	≥30g/L	＜30g/L	Other surgery	≥36℃	≥40	No	No	No	No	Internal validation set
356	Female	≥65	＜3	＜25kg/m2	No	Yes	No	No	No	Yes	Yes	Open surgery	General anesthesia	＜270min	＜100ml	No	No	No	No	No	No	≥30g/L	≥30g/L	Urological surgery	≥36℃	≥40	No	Yes	Yes	No	Internal validation set
357	Female	≥65	＜3	≥25kg/m2	No	No	No	No	No	Yes	Yes	Open surgery	General anesthesia	＜270min	＜100ml	No	Yes	No	Yes	No	Yes	≥30g/L	≥30g/L	Cardiovascular surgery	＜36℃	＜40	No	Yes	Yes	No	Internal validation set
358	Male	≥65	≥3	＜25kg/m2	Yes	No	No	No	No	No	No	Open surgery	General anesthesia	＜270min	＜100ml	Yes	Yes	No	No	No	No	≥30g/L	＜30g/L	Gastrointestinal surgery	≥36℃	≥40	No	Yes	No	No	Internal validation set
359	Male	≥65	≥3	＜25kg/m2	Yes	Yes	Yes	Yes	No	Yes	No	Laparoscopic surgery	Non-general anesthesia	＜270min	≥100ml	Yes	No	Yes	Yes	No	Yes	≥30g/L	＜30g/L	Orthopedic surgery	＜36℃	≥40	No	Yes	No	No	Internal validation set
360	Female	≥65	≥3	＜25kg/m2	No	Yes	No	Yes	No	Yes	No	Laparoscopic surgery	Non-general anesthesia	＜270min	≥100ml	No	Yes	No	No	Yes	Yes	≥30g/L	≥30g/L	Gastrointestinal surgery	＜36℃	≥40	Yes	No	Yes	No	Internal validation set
361	Male	＜65	≥3	≥25kg/m2	Yes	No	No	No	No	No	No	Open surgery	General anesthesia	＜270min	≥100ml	Yes	No	No	No	Yes	Yes	≥30g/L	＜30g/L	Cardiovascular surgery	＜36℃	＜40	No	No	Yes	No	Internal validation set
362	Male	≥65	＜3	≥25kg/m2	Yes	Yes	No	Yes	No	Yes	No	Laparoscopic surgery	General anesthesia	＜270min	≥100ml	No	No	No	Yes	Yes	Yes	≥30g/L	＜30g/L	Gastrointestinal surgery	≥36℃	＜40	No	Yes	No	No	Internal validation set
363	Female	≥65	＜3	＜25kg/m2	No	No	No	No	No	No	No	Open surgery	General anesthesia	＜270min	≥100ml	No	Yes	No	Yes	Yes	No	＜30g/L	＜30g/L	Cardiovascular surgery	≥36℃	≥40	Yes	Yes	No	No	Internal validation set
364	Female	≥65	≥3	＜25kg/m2	No	No	No	No	No	No	Yes	Open surgery	Non-general anesthesia	＜270min	＜100ml	Yes	Yes	No	No	Yes	Yes	≥30g/L	＜30g/L	Urological surgery	＜36℃	＜40	No	No	No	No	Internal validation set
365	Male	≥65	＜3	≥25kg/m2	Yes	No	No	No	No	No	No	Open surgery	General anesthesia	＜270min	＜100ml	Yes	No	No	Yes	No	No	≥30g/L	≥30g/L	Other surgery	＜36℃	≥40	No	No	No	No	Internal validation set
366	Male	≥65	＜3	＜25kg/m2	Yes	No	No	No	Yes	Yes	Yes	Open surgery	General anesthesia	＜270min	＜100ml	No	Yes	No	Yes	Yes	Yes	≥30g/L	≥30g/L	Orthopedic surgery	＜36℃	≥40	No	Yes	No	No	Internal validation set
367	Male	≥65	＜3	＜25kg/m2	Yes	Yes	No	No	Yes	Yes	No	Open surgery	Non-general anesthesia	＜270min	＜100ml	Yes	Yes	No	No	No	Yes	≥30g/L	＜30g/L	Gastrointestinal surgery	≥36℃	≥40	No	No	No	No	Internal validation set
368	Male	≥65	＜3	≥25kg/m2	Yes	No	Yes	No	No	No	No	Open surgery	Non-general anesthesia	＜270min	＜100ml	Yes	No	No	No	No	No	＜30g/L	＜30g/L	Gastrointestinal surgery	＜36℃	≥40	Yes	Yes	Yes	No	Internal validation set
369	Female	≥65	＜3	≥25kg/m2	No	No	No	No	No	Yes	No	Open surgery	General anesthesia	＜270min	≥100ml	No	Yes	Yes	Yes	No	No	＜30g/L	＜30g/L	Gastrointestinal surgery	≥36℃	＜40	Yes	No	Yes	No	Internal validation set
370	Female	≥65	＜3	＜25kg/m2	No	No	Yes	No	No	No	No	Open surgery	General anesthesia	＜270min	＜100ml	No	No	Yes	No	No	Yes	≥30g/L	≥30g/L	Orthopedic surgery	＜36℃	＜40	Yes	Yes	No	No	Internal validation set
371	Female	＜65	＜3	≥25kg/m2	No	No	No	Yes	No	No	No	Laparoscopic surgery	Non-general anesthesia	＜270min	＜100ml	No	No	No	No	No	No	＜30g/L	＜30g/L	Gastrointestinal surgery	≥36℃	＜40	No	No	Yes	No	Internal validation set
372	Male	＜65	＜3	≥25kg/m2	Yes	Yes	No	Yes	No	Yes	No	Laparoscopic surgery	Non-general anesthesia	≥270min	＜100ml	No	No	Yes	No	No	No	＜30g/L	≥30g/L	Orthopedic surgery	＜36℃	＜40	No	Yes	Yes	No	Internal validation set
373	Male	＜65	＜3	≥25kg/m2	Yes	No	No	No	No	Yes	No	Open surgery	General anesthesia	≥270min	≥100ml	No	No	Yes	Yes	No	Yes	＜30g/L	＜30g/L	Urological surgery	≥36℃	≥40	No	Yes	No	No	Internal validation set
374	Male	≥65	＜3	≥25kg/m2	Yes	No	No	Yes	No	No	Yes	Laparoscopic surgery	Non-general anesthesia	＜270min	≥100ml	No	No	No	Yes	Yes	No	＜30g/L	≥30g/L	Urological surgery	＜36℃	≥40	No	Yes	Yes	No	Internal validation set
375	Female	≥65	＜3	＜25kg/m2	No	No	Yes	Yes	No	Yes	No	Laparoscopic surgery	General anesthesia	≥270min	＜100ml	No	No	No	No	Yes	No	＜30g/L	＜30g/L	Urological surgery	≥36℃	＜40	No	Yes	No	No	Internal validation set
376	Female	≥65	≥3	＜25kg/m2	No	No	No	No	No	No	No	Open surgery	General anesthesia	≥270min	≥100ml	No	No	No	Yes	Yes	No	＜30g/L	＜30g/L	Gastrointestinal surgery	≥36℃	≥40	Yes	No	No	No	Internal validation set
377	Female	≥65	≥3	＜25kg/m2	No	No	No	Yes	No	No	No	Laparoscopic surgery	General anesthesia	＜270min	＜100ml	No	No	No	No	Yes	Yes	＜30g/L	≥30g/L	Gastrointestinal surgery	≥36℃	≥40	No	No	Yes	No	Internal validation set
378	Female	＜65	＜3	≥25kg/m2	Yes	No	No	No	No	No	No	Open surgery	General anesthesia	≥270min	＜100ml	No	No	No	No	No	No	＜30g/L	≥30g/L	Orthopedic surgery	≥36℃	≥40	No	Yes	No	No	Internal validation set
379	Male	≥65	＜3	≥25kg/m2	No	No	Yes	No	No	No	No	Open surgery	General anesthesia	＜270min	≥100ml	No	No	No	Yes	Yes	No	≥30g/L	＜30g/L	Orthopedic surgery	＜36℃	＜40	No	Yes	No	No	Internal validation set
380	Male	≥65	≥3	≥25kg/m2	No	Yes	No	No	No	No	No	Open surgery	Non-general anesthesia	＜270min	≥100ml	No	No	No	Yes	Yes	Yes	＜30g/L	≥30g/L	Orthopedic surgery	≥36℃	＜40	Yes	Yes	No	No	Internal validation set
381	Male	≥65	≥3	＜25kg/m2	Yes	Yes	Yes	Yes	No	No	Yes	Laparoscopic surgery	General anesthesia	＜270min	≥100ml	No	Yes	No	No	No	Yes	＜30g/L	＜30g/L	Other surgery	＜36℃	＜40	Yes	No	Yes	No	Internal validation set
382	Female	≥65	≥3	＜25kg/m2	No	No	No	Yes	Yes	No	No	Laparoscopic surgery	General anesthesia	≥270min	≥100ml	No	Yes	No	Yes	Yes	No	＜30g/L	≥30g/L	Urological surgery	≥36℃	＜40	Yes	Yes	Yes	No	Internal validation set
383	Female	≥65	＜3	＜25kg/m2	No	No	No	No	No	Yes	No	Open surgery	General anesthesia	≥270min	≥100ml	No	No	Yes	Yes	No	No	＜30g/L	＜30g/L	Gastrointestinal surgery	＜36℃	＜40	No	No	No	No	Internal validation set
384	Male	＜65	＜3	≥25kg/m2	Yes	No	Yes	Yes	No	Yes	Yes	Laparoscopic surgery	Non-general anesthesia	＜270min	≥100ml	No	Yes	No	No	No	No	≥30g/L	＜30g/L	Gastrointestinal surgery	＜36℃	≥40	Yes	No	Yes	No	Internal validation set
385	Female	≥65	＜3	≥25kg/m2	No	No	Yes	No	No	No	No	Open surgery	Non-general anesthesia	≥270min	＜100ml	No	Yes	Yes	Yes	No	No	≥30g/L	≥30g/L	Gastrointestinal surgery	＜36℃	≥40	No	No	No	No	Internal validation set
386	Female	≥65	≥3	≥25kg/m2	No	No	Yes	No	No	No	No	Open surgery	General anesthesia	＜270min	＜100ml	No	No	No	No	Yes	No	＜30g/L	≥30g/L	Orthopedic surgery	＜36℃	＜40	Yes	No	Yes	No	Internal validation set
387	Female	≥65	≥3	≥25kg/m2	No	No	Yes	Yes	No	No	Yes	Laparoscopic surgery	General anesthesia	＜270min	＜100ml	No	Yes	No	No	Yes	Yes	≥30g/L	＜30g/L	Cardiovascular surgery	≥36℃	＜40	No	Yes	No	No	Internal validation set
388	Male	≥65	≥3	＜25kg/m2	No	Yes	No	Yes	No	No	No	Open surgery	Non-general anesthesia	≥270min	≥100ml	No	No	No	No	No	No	＜30g/L	≥30g/L	Urological surgery	＜36℃	＜40	No	Yes	Yes	No	Internal validation set
389	Male	≥65	≥3	≥25kg/m2	Yes	No	No	No	Yes	No	No	Open surgery	General anesthesia	≥270min	≥100ml	No	No	No	No	No	No	≥30g/L	＜30g/L	Orthopedic surgery	＜36℃	≥40	No	Yes	No	No	Internal validation set
390	Male	≥65	＜3	＜25kg/m2	No	Yes	No	Yes	Yes	No	No	Open surgery	General anesthesia	＜270min	≥100ml	Yes	No	Yes	No	No	No	＜30g/L	≥30g/L	Urological surgery	＜36℃	≥40	No	No	No	No	Internal validation set
391	Female	＜65	≥3	＜25kg/m2	No	No	No	Yes	No	Yes	No	Open surgery	General anesthesia	＜270min	≥100ml	Yes	Yes	No	No	No	No	＜30g/L	≥30g/L	Urological surgery	＜36℃	＜40	No	No	No	No	Internal validation set
392	Female	≥65	≥3	≥25kg/m2	No	No	No	No	No	No	No	Open surgery	Non-general anesthesia	＜270min	≥100ml	No	Yes	No	No	Yes	No	＜30g/L	≥30g/L	Orthopedic surgery	≥36℃	≥40	No	No	Yes	No	Internal validation set
393	Male	≥65	≥3	≥25kg/m2	Yes	No	Yes	Yes	No	No	No	Laparoscopic surgery	Non-general anesthesia	＜270min	＜100ml	Yes	No	No	No	No	No	＜30g/L	≥30g/L	Gastrointestinal surgery	≥36℃	≥40	No	Yes	Yes	No	Internal validation set
394	Female	≥65	＜3	＜25kg/m2	No	No	No	No	No	No	Yes	Open surgery	Non-general anesthesia	＜270min	＜100ml	Yes	Yes	No	No	Yes	Yes	≥30g/L	≥30g/L	Urological surgery	≥36℃	＜40	Yes	No	Yes	No	Internal validation set
395	Female	≥65	＜3	≥25kg/m2	No	No	No	No	No	Yes	No	Open surgery	General anesthesia	＜270min	＜100ml	No	No	No	No	Yes	Yes	≥30g/L	＜30g/L	Gastrointestinal surgery	＜36℃	≥40	Yes	Yes	No	No	Internal validation set
396	Male	≥65	≥3	≥25kg/m2	No	Yes	No	No	No	No	No	Open surgery	General anesthesia	≥270min	＜100ml	Yes	No	No	No	No	Yes	≥30g/L	≥30g/L	Gastrointestinal surgery	＜36℃	≥40	No	No	Yes	No	Internal validation set
397	Female	＜65	＜3	＜25kg/m2	No	No	No	No	No	Yes	Yes	Open surgery	Non-general anesthesia	≥270min	＜100ml	No	Yes	No	Yes	Yes	Yes	＜30g/L	≥30g/L	Cardiovascular surgery	＜36℃	＜40	Yes	Yes	Yes	No	Internal validation set
398	Male	≥65	＜3	≥25kg/m2	Yes	Yes	No	No	No	No	No	Open surgery	Non-general anesthesia	＜270min	≥100ml	Yes	Yes	Yes	Yes	No	No	＜30g/L	≥30g/L	Other surgery	＜36℃	＜40	No	No	No	No	Internal validation set
399	Male	≥65	＜3	＜25kg/m2	No	Yes	No	No	No	No	No	Open surgery	General anesthesia	≥270min	＜100ml	Yes	No	No	No	No	No	≥30g/L	＜30g/L	Cardiovascular surgery	≥36℃	＜40	Yes	Yes	No	No	Internal validation set
400	Female	≥65	≥3	＜25kg/m2	No	No	Yes	No	No	Yes	No	Open surgery	General anesthesia	≥270min	≥100ml	No	Yes	No	Yes	No	No	≥30g/L	＜30g/L	Orthopedic surgery	≥36℃	＜40	No	Yes	Yes	No	Internal validation set
401	Female	≥65	≥3	≥25kg/m2	No	Yes	No	No	No	Yes	No	Open surgery	General anesthesia	＜270min	≥100ml	Yes	Yes	No	Yes	Yes	No	＜30g/L	≥30g/L	Cardiovascular surgery	≥36℃	＜40	Yes	No	Yes	No	Internal validation set
402	Female	≥65	≥3	≥25kg/m2	No	No	Yes	No	No	Yes	No	Open surgery	General anesthesia	≥270min	＜100ml	Yes	No	No	No	Yes	No	≥30g/L	＜30g/L	Orthopedic surgery	＜36℃	＜40	Yes	No	No	No	Internal validation set
403	Male	≥65	＜3	≥25kg/m2	Yes	No	No	No	No	Yes	No	Open surgery	General anesthesia	＜270min	≥100ml	No	Yes	No	Yes	No	No	≥30g/L	＜30g/L	Orthopedic surgery	＜36℃	＜40	Yes	No	Yes	No	Internal validation set
404	Male	≥65	≥3	＜25kg/m2	Yes	No	No	No	No	No	No	Open surgery	General anesthesia	＜270min	＜100ml	Yes	No	No	No	No	No	≥30g/L	≥30g/L	Other surgery	＜36℃	≥40	No	Yes	Yes	No	Internal validation set
405	Male	≥65	≥3	＜25kg/m2	Yes	No	No	Yes	Yes	No	No	Laparoscopic surgery	Non-general anesthesia	＜270min	＜100ml	No	No	No	No	No	No	＜30g/L	≥30g/L	Orthopedic surgery	＜36℃	≥40	Yes	Yes	Yes	No	Internal validation set
406	Male	≥65	≥3	≥25kg/m2	Yes	Yes	No	Yes	No	No	No	Laparoscopic surgery	Non-general anesthesia	≥270min	≥100ml	No	Yes	No	No	No	Yes	≥30g/L	≥30g/L	Other surgery	＜36℃	≥40	Yes	No	No	No	Internal validation set
407	Male	＜65	≥3	＜25kg/m2	Yes	No	Yes	No	No	No	No	Open surgery	General anesthesia	≥270min	≥100ml	No	No	No	Yes	Yes	Yes	＜30g/L	＜30g/L	Urological surgery	≥36℃	≥40	No	Yes	Yes	No	Internal validation set
408	Female	＜65	≥3	＜25kg/m2	No	No	No	Yes	No	No	No	Laparoscopic surgery	General anesthesia	＜270min	≥100ml	Yes	No	No	Yes	No	Yes	＜30g/L	≥30g/L	Urological surgery	＜36℃	＜40	Yes	No	No	No	Internal validation set
409	Male	＜65	≥3	＜25kg/m2	No	No	No	Yes	No	No	No	Open surgery	Non-general anesthesia	≥270min	≥100ml	Yes	No	No	No	No	Yes	＜30g/L	＜30g/L	Gastrointestinal surgery	≥36℃	＜40	Yes	No	Yes	No	Internal validation set
410	Male	≥65	＜3	≥25kg/m2	No	No	No	No	No	No	Yes	Open surgery	Non-general anesthesia	＜270min	＜100ml	No	Yes	No	Yes	No	Yes	≥30g/L	＜30g/L	Gastrointestinal surgery	＜36℃	≥40	No	No	Yes	No	Internal validation set
411	Male	≥65	≥3	≥25kg/m2	No	Yes	Yes	Yes	No	No	No	Open surgery	General anesthesia	＜270min	＜100ml	Yes	Yes	No	No	Yes	No	≥30g/L	＜30g/L	Gastrointestinal surgery	＜36℃	＜40	No	No	No	No	Internal validation set
412	Male	＜65	≥3	＜25kg/m2	No	No	No	No	No	No	No	Open surgery	General anesthesia	≥270min	＜100ml	No	No	No	No	Yes	No	≥30g/L	＜30g/L	Gastrointestinal surgery	＜36℃	≥40	No	Yes	No	No	Internal validation set
413	Female	≥65	≥3	＜25kg/m2	No	No	Yes	No	No	No	Yes	Open surgery	General anesthesia	≥270min	≥100ml	No	Yes	No	Yes	No	No	＜30g/L	＜30g/L	Gastrointestinal surgery	＜36℃	≥40	No	Yes	No	No	Internal validation set
414	Male	≥65	≥3	≥25kg/m2	No	No	No	No	No	No	No	Open surgery	General anesthesia	＜270min	≥100ml	Yes	No	No	Yes	Yes	Yes	≥30g/L	≥30g/L	Cardiovascular surgery	＜36℃	＜40	Yes	Yes	Yes	No	Internal validation set
415	Female	≥65	≥3	≥25kg/m2	No	Yes	No	Yes	No	No	No	Laparoscopic surgery	Non-general anesthesia	＜270min	≥100ml	Yes	No	Yes	No	No	No	≥30g/L	＜30g/L	Orthopedic surgery	＜36℃	≥40	Yes	Yes	Yes	No	Internal validation set
416	Male	≥65	≥3	≥25kg/m2	Yes	Yes	Yes	Yes	No	No	No	Laparoscopic surgery	Non-general anesthesia	＜270min	≥100ml	No	Yes	No	Yes	Yes	Yes	≥30g/L	＜30g/L	Urological surgery	≥36℃	≥40	No	No	No	No	Internal validation set
417	Male	≥65	＜3	≥25kg/m2	Yes	No	Yes	No	Yes	No	Yes	Open surgery	General anesthesia	＜270min	≥100ml	Yes	Yes	No	Yes	Yes	Yes	≥30g/L	＜30g/L	Gastrointestinal surgery	＜36℃	＜40	No	Yes	Yes	No	Internal validation set
418	Male	＜65	≥3	＜25kg/m2	No	Yes	No	Yes	No	No	No	Laparoscopic surgery	General anesthesia	＜270min	＜100ml	No	No	No	No	No	Yes	≥30g/L	≥30g/L	Other surgery	＜36℃	≥40	No	No	No	No	Internal validation set
419	Female	≥65	≥3	＜25kg/m2	No	No	No	No	No	No	No	Open surgery	General anesthesia	＜270min	＜100ml	No	No	No	Yes	No	No	≥30g/L	≥30g/L	Orthopedic surgery	＜36℃	≥40	Yes	Yes	Yes	No	Internal validation set
420	Female	≥65	≥3	≥25kg/m2	No	No	Yes	No	No	No	Yes	Open surgery	General anesthesia	＜270min	＜100ml	No	No	Yes	No	Yes	Yes	＜30g/L	≥30g/L	Urological surgery	＜36℃	＜40	Yes	No	No	No	Internal validation set
421	Female	≥65	≥3	≥25kg/m2	No	No	No	Yes	No	Yes	No	Laparoscopic surgery	Non-general anesthesia	＜270min	＜100ml	No	No	Yes	No	Yes	Yes	≥30g/L	＜30g/L	Urological surgery	≥36℃	＜40	No	Yes	Yes	No	Internal validation set
422	Female	≥65	≥3	＜25kg/m2	No	No	Yes	Yes	No	No	No	Open surgery	General anesthesia	＜270min	＜100ml	No	No	No	Yes	Yes	No	≥30g/L	＜30g/L	Gastrointestinal surgery	＜36℃	＜40	No	No	No	No	Internal validation set
423	Male	≥65	≥3	≥25kg/m2	Yes	Yes	No	No	Yes	Yes	No	Open surgery	Non-general anesthesia	≥270min	＜100ml	Yes	No	No	No	Yes	No	＜30g/L	≥30g/L	Other surgery	＜36℃	＜40	Yes	No	No	No	Internal validation set
424	Male	≥65	＜3	≥25kg/m2	Yes	No	No	Yes	No	No	Yes	Open surgery	General anesthesia	≥270min	＜100ml	No	No	No	No	No	No	＜30g/L	＜30g/L	Other surgery	≥36℃	≥40	No	No	Yes	No	Internal validation set
425	Male	≥65	≥3	≥25kg/m2	Yes	No	No	Yes	No	Yes	No	Open surgery	Non-general anesthesia	＜270min	＜100ml	Yes	No	No	No	Yes	Yes	≥30g/L	≥30g/L	Orthopedic surgery	≥36℃	＜40	Yes	Yes	Yes	No	Internal validation set
426	Female	≥65	≥3	＜25kg/m2	No	No	No	No	No	No	No	Open surgery	General anesthesia	≥270min	≥100ml	Yes	No	Yes	No	Yes	No	≥30g/L	＜30g/L	Urological surgery	≥36℃	≥40	Yes	No	Yes	No	Internal validation set
427	Male	≥65	≥3	＜25kg/m2	No	No	Yes	Yes	No	No	No	Laparoscopic surgery	General anesthesia	≥270min	≥100ml	No	Yes	Yes	No	No	Yes	≥30g/L	≥30g/L	Gastrointestinal surgery	≥36℃	≥40	No	Yes	Yes	No	Internal validation set
428	Female	＜65	≥3	≥25kg/m2	No	Yes	No	No	No	No	No	Open surgery	Non-general anesthesia	＜270min	＜100ml	No	Yes	Yes	No	No	No	＜30g/L	≥30g/L	Gastrointestinal surgery	≥36℃	＜40	No	No	No	No	Internal validation set
429	Female	＜65	≥3	＜25kg/m2	No	No	No	No	No	Yes	No	Open surgery	General anesthesia	≥270min	≥100ml	Yes	No	No	No	Yes	Yes	≥30g/L	＜30g/L	Gastrointestinal surgery	＜36℃	≥40	Yes	Yes	Yes	No	Internal validation set
430	Female	＜65	≥3	＜25kg/m2	No	No	No	Yes	No	Yes	No	Laparoscopic surgery	Non-general anesthesia	＜270min	≥100ml	No	Yes	Yes	No	Yes	Yes	＜30g/L	≥30g/L	Cardiovascular surgery	≥36℃	≥40	No	Yes	Yes	No	Internal validation set
431	Male	≥65	≥3	＜25kg/m2	Yes	No	Yes	No	No	No	Yes	Open surgery	General anesthesia	＜270min	≥100ml	No	Yes	No	No	No	No	＜30g/L	＜30g/L	Urological surgery	＜36℃	≥40	Yes	No	No	No	Internal validation set
432	Female	≥65	≥3	≥25kg/m2	No	No	No	No	Yes	Yes	No	Open surgery	General anesthesia	＜270min	≥100ml	No	No	No	Yes	Yes	Yes	≥30g/L	≥30g/L	Urological surgery	＜36℃	≥40	Yes	No	Yes	No	Internal validation set
433	Female	＜65	＜3	≥25kg/m2	No	No	Yes	No	Yes	No	No	Open surgery	Non-general anesthesia	≥270min	≥100ml	Yes	Yes	No	Yes	No	Yes	≥30g/L	≥30g/L	Cardiovascular surgery	＜36℃	≥40	No	No	No	No	Internal validation set
434	Female	≥65	≥3	＜25kg/m2	No	No	No	Yes	No	No	No	Laparoscopic surgery	General anesthesia	≥270min	＜100ml	No	No	No	No	No	No	＜30g/L	≥30g/L	Other surgery	≥36℃	＜40	No	Yes	No	No	Internal validation set
435	Female	≥65	≥3	＜25kg/m2	No	No	No	Yes	No	Yes	No	Laparoscopic surgery	General anesthesia	＜270min	＜100ml	No	No	Yes	No	No	No	≥30g/L	＜30g/L	Orthopedic surgery	≥36℃	≥40	Yes	Yes	Yes	No	Internal validation set
436	Male	≥65	≥3	≥25kg/m2	No	Yes	Yes	No	No	Yes	No	Open surgery	General anesthesia	≥270min	＜100ml	No	No	Yes	No	Yes	No	＜30g/L	≥30g/L	Other surgery	≥36℃	＜40	Yes	No	No	No	Internal validation set
437	Male	≥65	≥3	≥25kg/m2	Yes	Yes	Yes	Yes	No	No	No	Open surgery	Non-general anesthesia	＜270min	≥100ml	No	No	Yes	No	Yes	Yes	≥30g/L	≥30g/L	Orthopedic surgery	＜36℃	＜40	No	No	Yes	No	Internal validation set
438	Male	≥65	＜3	≥25kg/m2	Yes	No	Yes	No	No	No	No	Open surgery	Non-general anesthesia	＜270min	≥100ml	No	No	No	No	No	No	≥30g/L	＜30g/L	Other surgery	≥36℃	≥40	No	Yes	No	No	Internal validation set
439	Male	＜65	≥3	≥25kg/m2	Yes	No	Yes	No	No	No	No	Open surgery	General anesthesia	≥270min	≥100ml	No	No	No	No	No	Yes	≥30g/L	≥30g/L	Gastrointestinal surgery	≥36℃	＜40	No	Yes	No	No	Internal validation set
440	Female	≥65	＜3	＜25kg/m2	No	No	No	Yes	No	Yes	No	Open surgery	Non-general anesthesia	≥270min	≥100ml	Yes	No	No	No	Yes	Yes	＜30g/L	≥30g/L	Orthopedic surgery	＜36℃	≥40	Yes	No	Yes	No	Internal validation set
441	Female	≥65	≥3	＜25kg/m2	No	No	No	Yes	No	No	Yes	Laparoscopic surgery	Non-general anesthesia	＜270min	≥100ml	No	Yes	Yes	No	Yes	Yes	≥30g/L	≥30g/L	Other surgery	＜36℃	＜40	No	No	No	No	Internal validation set
442	Female	≥65	＜3	≥25kg/m2	No	No	No	No	No	No	Yes	Open surgery	General anesthesia	＜270min	＜100ml	No	No	Yes	No	No	No	＜30g/L	＜30g/L	Orthopedic surgery	≥36℃	≥40	No	No	Yes	No	Internal validation set
443	Male	≥65	＜3	≥25kg/m2	Yes	No	No	No	No	No	No	Open surgery	General anesthesia	＜270min	＜100ml	Yes	Yes	Yes	Yes	Yes	Yes	＜30g/L	＜30g/L	Orthopedic surgery	＜36℃	＜40	Yes	Yes	Yes	No	Internal validation set
444	Male	≥65	＜3	＜25kg/m2	Yes	Yes	No	No	No	Yes	Yes	Open surgery	Non-general anesthesia	＜270min	＜100ml	Yes	No	No	Yes	Yes	Yes	＜30g/L	≥30g/L	Urological surgery	≥36℃	≥40	No	Yes	Yes	No	Internal validation set
445	Male	≥65	≥3	≥25kg/m2	Yes	No	No	No	No	Yes	No	Open surgery	General anesthesia	＜270min	＜100ml	No	No	No	No	Yes	Yes	＜30g/L	≥30g/L	Gastrointestinal surgery	≥36℃	＜40	Yes	Yes	No	No	Internal validation set
446	Male	≥65	≥3	＜25kg/m2	Yes	Yes	No	No	No	No	No	Open surgery	Non-general anesthesia	＜270min	＜100ml	Yes	No	No	Yes	No	Yes	≥30g/L	≥30g/L	Gastrointestinal surgery	≥36℃	＜40	Yes	Yes	Yes	No	Internal validation set
447	Female	≥65	＜3	＜25kg/m2	No	No	No	No	No	Yes	Yes	Open surgery	Non-general anesthesia	＜270min	≥100ml	No	No	No	Yes	Yes	No	＜30g/L	＜30g/L	Orthopedic surgery	≥36℃	＜40	No	Yes	Yes	No	Internal validation set
448	Female	≥65	≥3	≥25kg/m2	No	No	No	No	Yes	No	Yes	Open surgery	General anesthesia	＜270min	＜100ml	No	Yes	No	No	Yes	No	≥30g/L	＜30g/L	Urological surgery	≥36℃	≥40	No	Yes	No	No	Internal validation set
449	Female	＜65	＜3	≥25kg/m2	No	No	No	No	No	No	No	Open surgery	General anesthesia	＜270min	≥100ml	No	Yes	Yes	Yes	No	Yes	≥30g/L	≥30g/L	Other surgery	＜36℃	＜40	No	Yes	No	No	Internal validation set
450	Female	＜65	＜3	＜25kg/m2	No	No	No	No	No	Yes	Yes	Open surgery	Non-general anesthesia	＜270min	＜100ml	No	No	No	No	Yes	No	≥30g/L	≥30g/L	Cardiovascular surgery	≥36℃	≥40	Yes	Yes	Yes	No	Internal validation set
451	Male	＜65	＜3	≥25kg/m2	No	Yes	No	Yes	No	Yes	Yes	Laparoscopic surgery	Non-general anesthesia	＜270min	＜100ml	Yes	Yes	Yes	No	No	No	≥30g/L	＜30g/L	Other surgery	＜36℃	≥40	Yes	No	No	No	Internal validation set
452	Male	≥65	＜3	≥25kg/m2	No	Yes	No	Yes	No	No	No	Laparoscopic surgery	General anesthesia	≥270min	＜100ml	No	No	No	No	No	No	≥30g/L	≥30g/L	Orthopedic surgery	≥36℃	＜40	Yes	No	No	No	Internal validation set
453	Female	≥65	≥3	＜25kg/m2	No	No	Yes	No	No	No	Yes	Open surgery	Non-general anesthesia	≥270min	＜100ml	No	No	No	No	Yes	Yes	＜30g/L	＜30g/L	Gastrointestinal surgery	≥36℃	≥40	No	Yes	No	No	Internal validation set
454	Male	≥65	＜3	＜25kg/m2	No	Yes	No	Yes	No	No	No	Laparoscopic surgery	General anesthesia	＜270min	＜100ml	No	No	No	No	No	No	＜30g/L	＜30g/L	Gastrointestinal surgery	≥36℃	＜40	No	Yes	Yes	No	Internal validation set
455	Female	＜65	≥3	≥25kg/m2	No	No	Yes	Yes	No	No	No	Laparoscopic surgery	General anesthesia	≥270min	＜100ml	No	No	Yes	No	No	Yes	≥30g/L	≥30g/L	Gastrointestinal surgery	＜36℃	＜40	Yes	Yes	No	No	Internal validation set
456	Female	≥65	＜3	≥25kg/m2	No	No	No	No	No	No	No	Open surgery	Non-general anesthesia	≥270min	＜100ml	Yes	Yes	Yes	No	No	Yes	＜30g/L	≥30g/L	Gastrointestinal surgery	≥36℃	＜40	No	No	Yes	No	Internal validation set
457	Male	≥65	＜3	＜25kg/m2	Yes	No	No	Yes	No	No	Yes	Open surgery	General anesthesia	＜270min	≥100ml	No	No	No	Yes	No	No	＜30g/L	≥30g/L	Orthopedic surgery	≥36℃	＜40	No	Yes	No	No	Internal validation set
458	Female	≥65	＜3	＜25kg/m2	No	No	No	No	No	No	Yes	Open surgery	General anesthesia	≥270min	＜100ml	No	No	Yes	No	No	Yes	＜30g/L	≥30g/L	Cardiovascular surgery	＜36℃	≥40	Yes	Yes	Yes	No	Internal validation set
459	Male	≥65	≥3	≥25kg/m2	No	Yes	No	No	No	No	No	Open surgery	General anesthesia	＜270min	≥100ml	No	No	No	Yes	No	No	≥30g/L	＜30g/L	Orthopedic surgery	≥36℃	＜40	No	Yes	Yes	No	Internal validation set
460	Female	≥65	≥3	≥25kg/m2	No	No	Yes	No	Yes	No	No	Open surgery	General anesthesia	＜270min	≥100ml	No	No	Yes	No	Yes	Yes	＜30g/L	≥30g/L	Urological surgery	＜36℃	≥40	No	Yes	Yes	No	Internal validation set
461	Female	＜65	＜3	＜25kg/m2	No	No	No	No	No	No	No	Open surgery	Non-general anesthesia	＜270min	≥100ml	No	No	Yes	No	Yes	Yes	＜30g/L	≥30g/L	Urological surgery	＜36℃	≥40	Yes	Yes	Yes	No	Internal validation set
462	Female	≥65	≥3	≥25kg/m2	No	No	No	No	No	No	No	Open surgery	Non-general anesthesia	≥270min	≥100ml	No	No	No	No	No	No	＜30g/L	＜30g/L	Cardiovascular surgery	≥36℃	≥40	Yes	No	No	No	Internal validation set
463	Female	≥65	＜3	＜25kg/m2	No	No	No	No	No	No	No	Open surgery	General anesthesia	≥270min	＜100ml	No	No	No	No	Yes	No	≥30g/L	＜30g/L	Orthopedic surgery	＜36℃	＜40	No	Yes	No	No	Internal validation set
464	Male	≥65	＜3	＜25kg/m2	Yes	Yes	Yes	No	No	No	No	Open surgery	Non-general anesthesia	＜270min	＜100ml	Yes	No	Yes	Yes	Yes	No	＜30g/L	≥30g/L	Orthopedic surgery	≥36℃	＜40	No	Yes	Yes	No	Internal validation set
465	Male	≥65	＜3	≥25kg/m2	Yes	No	No	Yes	No	Yes	No	Laparoscopic surgery	General anesthesia	≥270min	＜100ml	Yes	No	Yes	Yes	Yes	No	≥30g/L	≥30g/L	Gastrointestinal surgery	＜36℃	≥40	No	No	Yes	No	Internal validation set
466	Female	≥65	＜3	≥25kg/m2	Yes	No	Yes	No	Yes	Yes	No	Open surgery	Non-general anesthesia	＜270min	≥100ml	No	No	No	No	No	No	≥30g/L	≥30g/L	Gastrointestinal surgery	＜36℃	＜40	Yes	Yes	Yes	No	Internal validation set
467	Male	≥65	≥3	＜25kg/m2	Yes	No	No	Yes	No	No	Yes	Laparoscopic surgery	General anesthesia	＜270min	≥100ml	No	No	No	Yes	No	Yes	≥30g/L	≥30g/L	Gastrointestinal surgery	＜36℃	＜40	No	Yes	No	No	Internal validation set
468	Female	≥65	＜3	＜25kg/m2	No	No	No	No	No	Yes	No	Open surgery	General anesthesia	≥270min	≥100ml	No	Yes	No	No	No	No	＜30g/L	＜30g/L	Cardiovascular surgery	≥36℃	≥40	Yes	Yes	No	No	Internal validation set
469	Female	≥65	＜3	≥25kg/m2	No	No	Yes	No	No	No	No	Open surgery	Non-general anesthesia	≥270min	≥100ml	No	Yes	Yes	No	No	No	≥30g/L	≥30g/L	Orthopedic surgery	＜36℃	＜40	Yes	Yes	Yes	No	Internal validation set
470	Female	≥65	＜3	≥25kg/m2	No	No	Yes	No	No	No	No	Open surgery	General anesthesia	＜270min	≥100ml	No	No	Yes	No	No	Yes	≥30g/L	≥30g/L	Gastrointestinal surgery	＜36℃	＜40	Yes	No	Yes	No	Internal validation set
471	Female	＜65	≥3	＜25kg/m2	No	No	No	No	No	No	No	Open surgery	General anesthesia	＜270min	＜100ml	No	Yes	No	No	Yes	Yes	≥30g/L	≥30g/L	Gastrointestinal surgery	＜36℃	≥40	Yes	Yes	No	No	Internal validation set
472	Male	＜65	≥3	＜25kg/m2	No	Yes	No	Yes	No	No	Yes	Laparoscopic surgery	General anesthesia	＜270min	＜100ml	Yes	No	No	Yes	No	Yes	＜30g/L	≥30g/L	Orthopedic surgery	≥36℃	≥40	Yes	No	No	No	Internal validation set
473	Male	＜65	＜3	＜25kg/m2	No	Yes	No	Yes	No	No	No	Open surgery	Non-general anesthesia	＜270min	＜100ml	No	No	Yes	No	Yes	Yes	＜30g/L	≥30g/L	Orthopedic surgery	＜36℃	＜40	No	No	No	No	Internal validation set
474	Female	≥65	＜3	≥25kg/m2	No	No	No	No	Yes	Yes	No	Open surgery	Non-general anesthesia	＜270min	＜100ml	Yes	Yes	No	No	No	No	≥30g/L	≥30g/L	Cardiovascular surgery	≥36℃	≥40	Yes	Yes	No	No	Internal validation set
475	Male	≥65	＜3	≥25kg/m2	Yes	No	Yes	Yes	No	No	No	Open surgery	General anesthesia	＜270min	＜100ml	No	Yes	Yes	No	Yes	Yes	＜30g/L	＜30g/L	Urological surgery	＜36℃	＜40	No	No	Yes	No	Internal validation set
476	Male	≥65	＜3	≥25kg/m2	Yes	No	Yes	No	No	No	No	Open surgery	General anesthesia	＜270min	＜100ml	No	No	No	No	No	Yes	＜30g/L	＜30g/L	Orthopedic surgery	＜36℃	≥40	Yes	Yes	Yes	No	Internal validation set
477	Female	＜65	＜3	＜25kg/m2	Yes	No	Yes	No	No	No	No	Open surgery	Non-general anesthesia	＜270min	≥100ml	No	Yes	No	No	No	Yes	＜30g/L	≥30g/L	Urological surgery	≥36℃	≥40	Yes	Yes	No	No	Internal validation set
478	Female	≥65	＜3	≥25kg/m2	Yes	No	No	No	No	No	No	Open surgery	General anesthesia	＜270min	＜100ml	No	Yes	No	No	Yes	Yes	≥30g/L	＜30g/L	Other surgery	≥36℃	≥40	No	Yes	No	No	Internal validation set
479	Male	≥65	＜3	≥25kg/m2	Yes	No	No	No	No	Yes	No	Open surgery	General anesthesia	＜270min	＜100ml	No	No	Yes	No	Yes	Yes	≥30g/L	≥30g/L	Urological surgery	≥36℃	≥40	No	Yes	No	No	Internal validation set
480	Male	≥65	＜3	≥25kg/m2	No	Yes	No	Yes	Yes	No	No	Laparoscopic surgery	General anesthesia	＜270min	＜100ml	No	Yes	No	No	No	No	＜30g/L	＜30g/L	Other surgery	＜36℃	≥40	Yes	Yes	No	No	Internal validation set
481	Female	≥65	＜3	≥25kg/m2	No	No	No	No	No	Yes	No	Open surgery	Non-general anesthesia	＜270min	＜100ml	No	Yes	No	No	Yes	No	≥30g/L	＜30g/L	Other surgery	＜36℃	＜40	Yes	Yes	Yes	No	Internal validation set
482	Male	≥65	＜3	＜25kg/m2	No	Yes	Yes	No	No	No	No	Open surgery	General anesthesia	≥270min	＜100ml	Yes	Yes	Yes	No	No	Yes	＜30g/L	＜30g/L	Cardiovascular surgery	≥36℃	≥40	No	No	Yes	No	Internal validation set
483	Male	＜65	≥3	≥25kg/m2	No	No	Yes	No	No	No	No	Open surgery	Non-general anesthesia	≥270min	＜100ml	No	No	No	No	Yes	No	＜30g/L	＜30g/L	Urological surgery	＜36℃	＜40	No	No	Yes	No	Internal validation set
484	Male	≥65	＜3	≥25kg/m2	No	No	No	No	No	No	No	Open surgery	Non-general anesthesia	＜270min	＜100ml	No	Yes	No	Yes	Yes	No	≥30g/L	＜30g/L	Orthopedic surgery	≥36℃	≥40	No	Yes	Yes	No	Internal validation set
485	Male	≥65	＜3	＜25kg/m2	No	No	Yes	Yes	No	No	No	Open surgery	General anesthesia	≥270min	≥100ml	No	Yes	Yes	Yes	No	Yes	≥30g/L	≥30g/L	Gastrointestinal surgery	≥36℃	＜40	Yes	Yes	No	No	Internal validation set
486	Female	≥65	＜3	＜25kg/m2	No	No	No	No	No	No	Yes	Open surgery	Non-general anesthesia	≥270min	≥100ml	No	No	No	No	No	Yes	≥30g/L	＜30g/L	Orthopedic surgery	＜36℃	≥40	Yes	No	No	No	Internal validation set
487	Female	≥65	＜3	≥25kg/m2	No	No	No	No	No	No	No	Open surgery	Non-general anesthesia	＜270min	≥100ml	No	Yes	No	Yes	No	Yes	≥30g/L	＜30g/L	Cardiovascular surgery	＜36℃	≥40	Yes	Yes	No	No	Internal validation set
488	Female	≥65	＜3	≥25kg/m2	No	No	No	No	No	Yes	No	Open surgery	General anesthesia	≥270min	≥100ml	No	No	No	No	Yes	Yes	≥30g/L	≥30g/L	Urological surgery	≥36℃	≥40	Yes	Yes	Yes	No	Internal validation set
489	Male	≥65	≥3	＜25kg/m2	No	No	No	No	Yes	No	Yes	Open surgery	General anesthesia	＜270min	＜100ml	Yes	No	No	No	Yes	No	≥30g/L	＜30g/L	Other surgery	＜36℃	＜40	No	Yes	Yes	No	Internal validation set
490	Female	≥65	＜3	＜25kg/m2	Yes	No	No	No	Yes	Yes	Yes	Open surgery	General anesthesia	＜270min	＜100ml	No	No	No	Yes	No	No	＜30g/L	≥30g/L	Cardiovascular surgery	＜36℃	＜40	Yes	Yes	No	No	Internal validation set
491	Male	≥65	＜3	≥25kg/m2	No	Yes	No	No	No	No	No	Open surgery	Non-general anesthesia	＜270min	＜100ml	No	Yes	No	Yes	No	No	≥30g/L	≥30g/L	Urological surgery	＜36℃	＜40	No	No	Yes	No	Internal validation set
492	Male	≥65	＜3	≥25kg/m2	No	Yes	No	No	No	No	No	Open surgery	Non-general anesthesia	≥270min	≥100ml	Yes	Yes	No	No	No	Yes	≥30g/L	＜30g/L	Gastrointestinal surgery	＜36℃	＜40	Yes	Yes	No	No	Internal validation set
493	Female	＜65	＜3	＜25kg/m2	No	No	No	No	No	No	No	Open surgery	General anesthesia	≥270min	≥100ml	No	No	Yes	Yes	No	No	＜30g/L	＜30g/L	Other surgery	≥36℃	＜40	Yes	No	No	No	Internal validation set
494	Male	＜65	＜3	≥25kg/m2	No	Yes	No	No	No	No	No	Open surgery	General anesthesia	＜270min	≥100ml	No	Yes	No	Yes	Yes	Yes	≥30g/L	＜30g/L	Urological surgery	≥36℃	＜40	No	No	Yes	No	Internal validation set
495	Male	＜65	＜3	＜25kg/m2	Yes	No	No	No	No	No	No	Open surgery	Non-general anesthesia	≥270min	≥100ml	Yes	No	No	No	No	Yes	≥30g/L	＜30g/L	Gastrointestinal surgery	≥36℃	＜40	Yes	No	Yes	No	Internal validation set
496	Female	≥65	≥3	＜25kg/m2	Yes	No	No	No	No	Yes	No	Open surgery	Non-general anesthesia	＜270min	≥100ml	No	No	No	Yes	Yes	No	＜30g/L	＜30g/L	Gastrointestinal surgery	≥36℃	≥40	No	No	No	No	Internal validation set
497	Male	≥65	＜3	≥25kg/m2	Yes	No	Yes	Yes	No	Yes	No	Laparoscopic surgery	General anesthesia	＜270min	＜100ml	No	Yes	No	Yes	No	No	＜30g/L	≥30g/L	Other surgery	＜36℃	≥40	No	Yes	Yes	No	Internal validation set
498	Male	≥65	＜3	≥25kg/m2	Yes	No	Yes	Yes	No	No	No	Open surgery	Non-general anesthesia	≥270min	＜100ml	No	Yes	No	Yes	No	Yes	＜30g/L	≥30g/L	Gastrointestinal surgery	＜36℃	＜40	No	Yes	Yes	No	Internal validation set
499	Female	≥65	＜3	＜25kg/m2	No	Yes	No	Yes	No	Yes	No	Open surgery	Non-general anesthesia	≥270min	＜100ml	No	No	No	No	No	No	≥30g/L	≥30g/L	Urological surgery	≥36℃	≥40	Yes	Yes	Yes	No	Internal validation set
500	Female	＜65	＜3	≥25kg/m2	No	No	Yes	Yes	No	No	No	Open surgery	Non-general anesthesia	＜270min	＜100ml	No	Yes	Yes	Yes	Yes	Yes	＜30g/L	≥30g/L	Other surgery	≥36℃	＜40	No	Yes	No	No	Internal validation set
501	Female	≥65	＜3	≥25kg/m2	No	No	Yes	No	No	No	No	Open surgery	Non-general anesthesia	＜270min	＜100ml	No	Yes	No	Yes	Yes	Yes	＜30g/L	＜30g/L	Other surgery	≥36℃	≥40	Yes	Yes	No	No	Internal validation set
502	Female	≥65	≥3	＜25kg/m2	No	No	No	Yes	No	No	No	Laparoscopic surgery	Non-general anesthesia	＜270min	≥100ml	Yes	No	No	No	No	Yes	≥30g/L	＜30g/L	Gastrointestinal surgery	≥36℃	≥40	Yes	Yes	Yes	No	Internal validation set
503	Female	≥65	＜3	≥25kg/m2	No	No	Yes	Yes	No	No	No	Laparoscopic surgery	Non-general anesthesia	＜270min	＜100ml	No	Yes	Yes	Yes	No	No	＜30g/L	≥30g/L	Gastrointestinal surgery	≥36℃	≥40	No	Yes	No	No	Internal validation set
504	Female	≥65	＜3	≥25kg/m2	No	Yes	No	Yes	No	No	No	Open surgery	Non-general anesthesia	＜270min	≥100ml	No	No	Yes	No	No	Yes	≥30g/L	＜30g/L	Gastrointestinal surgery	≥36℃	≥40	No	No	No	No	Internal validation set
505	Male	≥65	＜3	＜25kg/m2	No	No	No	Yes	Yes	No	No	Open surgery	General anesthesia	＜270min	≥100ml	Yes	No	No	No	Yes	Yes	≥30g/L	≥30g/L	Cardiovascular surgery	≥36℃	＜40	No	Yes	Yes	No	Internal validation set
506	Female	＜65	＜3	＜25kg/m2	No	No	No	No	No	No	No	Open surgery	Non-general anesthesia	＜270min	≥100ml	No	No	Yes	No	Yes	Yes	＜30g/L	≥30g/L	Gastrointestinal surgery	≥36℃	＜40	Yes	Yes	Yes	No	Internal validation set
507	Male	≥65	＜3	≥25kg/m2	No	No	Yes	No	No	No	No	Open surgery	General anesthesia	≥270min	≥100ml	No	No	No	Yes	No	Yes	＜30g/L	≥30g/L	Gastrointestinal surgery	＜36℃	≥40	Yes	No	No	No	Internal validation set
508	Female	≥65	＜3	≥25kg/m2	Yes	No	Yes	Yes	No	No	No	Laparoscopic surgery	General anesthesia	≥270min	＜100ml	No	No	No	Yes	No	No	≥30g/L	≥30g/L	Gastrointestinal surgery	＜36℃	≥40	Yes	No	Yes	No	Internal validation set
509	Female	≥65	≥3	＜25kg/m2	No	No	No	Yes	No	No	No	Laparoscopic surgery	General anesthesia	＜270min	≥100ml	No	No	No	No	No	No	＜30g/L	＜30g/L	Cardiovascular surgery	＜36℃	≥40	No	Yes	No	No	Internal validation set
510	Female	≥65	≥3	＜25kg/m2	No	No	Yes	Yes	No	No	No	Laparoscopic surgery	General anesthesia	≥270min	≥100ml	No	No	Yes	Yes	No	Yes	≥30g/L	≥30g/L	Orthopedic surgery	＜36℃	≥40	No	No	No	No	Internal validation set
511	Female	≥65	≥3	≥25kg/m2	No	No	No	No	No	No	No	Open surgery	General anesthesia	≥270min	≥100ml	No	No	Yes	No	Yes	Yes	≥30g/L	＜30g/L	Other surgery	＜36℃	≥40	Yes	Yes	Yes	No	Internal validation set
512	Female	≥65	≥3	≥25kg/m2	No	Yes	No	Yes	No	No	Yes	Laparoscopic surgery	Non-general anesthesia	＜270min	≥100ml	No	No	No	No	No	Yes	＜30g/L	≥30g/L	Urological surgery	≥36℃	≥40	Yes	Yes	No	No	Internal validation set
513	Female	≥65	＜3	＜25kg/m2	No	Yes	No	Yes	No	No	No	Open surgery	Non-general anesthesia	≥270min	≥100ml	No	No	No	Yes	No	No	≥30g/L	＜30g/L	Orthopedic surgery	＜36℃	≥40	Yes	No	Yes	No	Internal validation set
514	Female	≥65	＜3	≥25kg/m2	No	No	No	Yes	No	No	Yes	Open surgery	General anesthesia	＜270min	＜100ml	No	No	No	Yes	Yes	Yes	≥30g/L	≥30g/L	Urological surgery	＜36℃	≥40	No	Yes	Yes	No	Internal validation set
515	Female	≥65	＜3	＜25kg/m2	No	No	No	Yes	No	No	No	Open surgery	General anesthesia	＜270min	＜100ml	No	No	No	No	Yes	Yes	＜30g/L	＜30g/L	Other surgery	≥36℃	＜40	No	No	No	No	Internal validation set
516	Female	＜65	≥3	＜25kg/m2	Yes	No	No	No	No	Yes	No	Open surgery	General anesthesia	＜270min	＜100ml	No	No	No	Yes	No	No	＜30g/L	＜30g/L	Urological surgery	≥36℃	＜40	Yes	No	Yes	No	Internal validation set
517	Female	＜65	≥3	≥25kg/m2	No	No	No	Yes	Yes	Yes	Yes	Laparoscopic surgery	General anesthesia	≥270min	≥100ml	No	No	Yes	Yes	No	No	＜30g/L	≥30g/L	Other surgery	＜36℃	≥40	Yes	No	Yes	No	Internal validation set
518	Male	＜65	≥3	≥25kg/m2	No	No	No	Yes	No	No	Yes	Laparoscopic surgery	Non-general anesthesia	≥270min	≥100ml	Yes	Yes	No	No	No	No	≥30g/L	＜30g/L	Gastrointestinal surgery	≥36℃	≥40	No	No	Yes	No	Internal validation set
519	Female	≥65	≥3	＜25kg/m2	No	No	No	Yes	No	No	No	Laparoscopic surgery	Non-general anesthesia	＜270min	≥100ml	No	Yes	No	Yes	Yes	Yes	＜30g/L	＜30g/L	Gastrointestinal surgery	＜36℃	≥40	Yes	Yes	Yes	No	Internal validation set
520	Female	≥65	＜3	＜25kg/m2	No	Yes	No	Yes	No	No	No	Open surgery	Non-general anesthesia	≥270min	≥100ml	No	No	No	No	Yes	No	＜30g/L	≥30g/L	Cardiovascular surgery	≥36℃	≥40	No	No	Yes	No	Internal validation set
521	Male	≥65	≥3	≥25kg/m2	Yes	No	No	Yes	No	No	No	Open surgery	Non-general anesthesia	＜270min	≥100ml	Yes	Yes	No	No	No	Yes	＜30g/L	≥30g/L	Urological surgery	≥36℃	≥40	Yes	Yes	Yes	No	Internal validation set
522	Male	＜65	≥3	≥25kg/m2	Yes	Yes	No	No	No	No	No	Open surgery	General anesthesia	＜270min	＜100ml	No	No	No	No	No	Yes	＜30g/L	＜30g/L	Gastrointestinal surgery	≥36℃	≥40	Yes	Yes	Yes	No	Internal validation set
523	Male	≥65	≥3	＜25kg/m2	Yes	No	No	Yes	Yes	No	No	Laparoscopic surgery	General anesthesia	≥270min	＜100ml	No	No	No	No	Yes	Yes	≥30g/L	＜30g/L	Urological surgery	≥36℃	＜40	No	No	Yes	No	Internal validation set
524	Male	≥65	≥3	＜25kg/m2	Yes	No	No	Yes	No	Yes	No	Laparoscopic surgery	General anesthesia	≥270min	＜100ml	No	Yes	No	No	No	No	＜30g/L	＜30g/L	Urological surgery	≥36℃	＜40	Yes	Yes	Yes	No	Internal validation set
525	Female	≥65	≥3	＜25kg/m2	No	No	No	Yes	No	No	No	Laparoscopic surgery	Non-general anesthesia	＜270min	＜100ml	Yes	Yes	No	No	No	Yes	≥30g/L	＜30g/L	Cardiovascular surgery	＜36℃	≥40	Yes	No	No	No	Internal validation set
526	Female	≥65	≥3	＜25kg/m2	No	No	Yes	No	No	Yes	No	Open surgery	Non-general anesthesia	＜270min	＜100ml	No	No	No	No	No	Yes	＜30g/L	≥30g/L	Gastrointestinal surgery	≥36℃	＜40	No	No	No	No	Internal validation set
527	Female	≥65	＜3	＜25kg/m2	No	No	Yes	Yes	No	No	No	Open surgery	General anesthesia	＜270min	≥100ml	No	Yes	No	No	Yes	Yes	＜30g/L	≥30g/L	Gastrointestinal surgery	≥36℃	＜40	No	No	No	No	Internal validation set
528	Female	＜65	＜3	＜25kg/m2	No	No	No	Yes	No	No	No	Open surgery	General anesthesia	＜270min	＜100ml	Yes	Yes	No	No	Yes	No	≥30g/L	＜30g/L	Urological surgery	＜36℃	≥40	No	Yes	No	No	Internal validation set
529	Female	≥65	＜3	＜25kg/m2	No	No	Yes	No	No	Yes	No	Open surgery	General anesthesia	＜270min	≥100ml	No	No	No	No	No	No	≥30g/L	≥30g/L	Other surgery	＜36℃	≥40	Yes	Yes	Yes	No	Internal validation set
530	Female	≥65	≥3	≥25kg/m2	No	No	Yes	No	No	Yes	No	Open surgery	Non-general anesthesia	＜270min	≥100ml	No	Yes	No	No	No	No	≥30g/L	≥30g/L	Cardiovascular surgery	≥36℃	＜40	Yes	Yes	No	No	Internal validation set
531	Female	≥65	≥3	＜25kg/m2	No	No	No	Yes	No	No	Yes	Laparoscopic surgery	Non-general anesthesia	＜270min	＜100ml	No	Yes	Yes	No	No	Yes	≥30g/L	＜30g/L	Orthopedic surgery	＜36℃	≥40	Yes	No	No	No	Internal validation set
532	Male	≥65	≥3	≥25kg/m2	No	Yes	Yes	No	Yes	Yes	Yes	Open surgery	General anesthesia	＜270min	≥100ml	Yes	Yes	No	No	Yes	Yes	≥30g/L	＜30g/L	Other surgery	＜36℃	＜40	No	Yes	No	No	Internal validation set
533	Male	≥65	≥3	≥25kg/m2	No	Yes	No	Yes	No	No	No	Laparoscopic surgery	General anesthesia	＜270min	≥100ml	No	No	No	No	Yes	No	≥30g/L	≥30g/L	Urological surgery	≥36℃	＜40	No	Yes	No	No	Internal validation set
534	Female	≥65	＜3	＜25kg/m2	No	No	No	Yes	No	No	Yes	Open surgery	Non-general anesthesia	＜270min	≥100ml	No	Yes	No	Yes	No	Yes	≥30g/L	＜30g/L	Gastrointestinal surgery	＜36℃	＜40	No	No	No	No	Internal validation set
535	Female	≥65	≥3	≥25kg/m2	No	Yes	No	Yes	No	No	Yes	Open surgery	General anesthesia	≥270min	≥100ml	No	Yes	Yes	Yes	No	No	＜30g/L	≥30g/L	Urological surgery	＜36℃	＜40	Yes	No	No	No	Internal validation set
536	Female	≥65	≥3	＜25kg/m2	No	No	Yes	No	No	Yes	No	Open surgery	Non-general anesthesia	≥270min	≥100ml	No	No	No	No	No	No	≥30g/L	＜30g/L	Urological surgery	≥36℃	≥40	Yes	No	Yes	No	Internal validation set
537	Male	≥65	≥3	＜25kg/m2	Yes	No	Yes	Yes	No	Yes	No	Laparoscopic surgery	General anesthesia	＜270min	＜100ml	No	Yes	Yes	Yes	No	No	＜30g/L	＜30g/L	Cardiovascular surgery	≥36℃	＜40	Yes	Yes	Yes	No	Internal validation set
538	Male	＜65	＜3	≥25kg/m2	Yes	No	No	Yes	Yes	No	No	Laparoscopic surgery	Non-general anesthesia	≥270min	＜100ml	No	No	No	No	No	Yes	＜30g/L	＜30g/L	Orthopedic surgery	＜36℃	＜40	Yes	No	No	No	Internal validation set
539	Male	＜65	＜3	≥25kg/m2	Yes	No	Yes	No	No	No	No	Open surgery	Non-general anesthesia	≥270min	＜100ml	Yes	No	No	No	No	No	＜30g/L	＜30g/L	Other surgery	≥36℃	＜40	Yes	No	No	No	Internal validation set
540	Female	＜65	≥3	＜25kg/m2	Yes	Yes	Yes	Yes	No	No	No	Laparoscopic surgery	General anesthesia	＜270min	≥100ml	No	No	No	Yes	No	Yes	＜30g/L	＜30g/L	Gastrointestinal surgery	＜36℃	＜40	No	No	Yes	No	Internal validation set
541	Male	≥65	＜3	＜25kg/m2	Yes	No	No	No	No	No	No	Open surgery	General anesthesia	≥270min	≥100ml	No	Yes	Yes	Yes	No	Yes	≥30g/L	＜30g/L	Cardiovascular surgery	≥36℃	＜40	Yes	Yes	Yes	No	Internal validation set
542	Female	≥65	≥3	＜25kg/m2	Yes	No	Yes	Yes	No	Yes	No	Laparoscopic surgery	General anesthesia	＜270min	≥100ml	No	Yes	No	No	No	Yes	≥30g/L	＜30g/L	Orthopedic surgery	≥36℃	＜40	No	No	Yes	No	Internal validation set
543	Male	≥65	＜3	≥25kg/m2	Yes	Yes	Yes	Yes	No	Yes	No	Laparoscopic surgery	Non-general anesthesia	＜270min	≥100ml	No	No	No	Yes	No	Yes	＜30g/L	≥30g/L	Urological surgery	＜36℃	≥40	No	No	Yes	No	Internal validation set
544	Male	≥65	＜3	≥25kg/m2	No	Yes	No	Yes	No	No	No	Open surgery	Non-general anesthesia	＜270min	≥100ml	No	Yes	No	Yes	Yes	Yes	≥30g/L	≥30g/L	Urological surgery	≥36℃	≥40	Yes	No	No	No	Internal validation set
545	Female	≥65	≥3	＜25kg/m2	No	No	No	Yes	No	Yes	No	Open surgery	General anesthesia	≥270min	＜100ml	No	No	No	No	No	No	≥30g/L	＜30g/L	Gastrointestinal surgery	＜36℃	≥40	Yes	Yes	Yes	No	Internal validation set
546	Female	＜65	≥3	＜25kg/m2	No	Yes	No	Yes	No	Yes	No	Laparoscopic surgery	Non-general anesthesia	≥270min	＜100ml	No	No	No	Yes	No	Yes	≥30g/L	≥30g/L	Cardiovascular surgery	＜36℃	＜40	No	Yes	No	No	Internal validation set
547	Female	＜65	＜3	≥25kg/m2	No	No	No	Yes	Yes	No	No	Laparoscopic surgery	Non-general anesthesia	＜270min	＜100ml	No	Yes	Yes	Yes	Yes	No	＜30g/L	≥30g/L	Orthopedic surgery	＜36℃	≥40	Yes	No	Yes	No	Internal validation set
548	Female	＜65	＜3	≥25kg/m2	No	No	No	No	Yes	Yes	No	Open surgery	General anesthesia	≥270min	＜100ml	No	Yes	No	Yes	Yes	Yes	＜30g/L	＜30g/L	Gastrointestinal surgery	＜36℃	≥40	No	Yes	No	No	Internal validation set
549	Female	＜65	＜3	＜25kg/m2	No	No	No	No	No	No	No	Open surgery	General anesthesia	＜270min	＜100ml	Yes	No	No	No	No	No	≥30g/L	≥30g/L	Urological surgery	≥36℃	＜40	Yes	Yes	Yes	No	Internal validation set
550	Female	＜65	＜3	≥25kg/m2	No	No	No	No	No	No	No	Open surgery	General anesthesia	＜270min	＜100ml	Yes	Yes	No	Yes	Yes	No	≥30g/L	＜30g/L	Orthopedic surgery	≥36℃	＜40	No	Yes	No	No	Internal validation set
551	Female	＜65	＜3	≥25kg/m2	No	Yes	No	Yes	No	No	No	Laparoscopic surgery	Non-general anesthesia	≥270min	＜100ml	No	Yes	Yes	Yes	No	No	＜30g/L	≥30g/L	Cardiovascular surgery	≥36℃	＜40	Yes	No	Yes	No	Internal validation set
552	Male	＜65	＜3	＜25kg/m2	No	No	No	Yes	No	Yes	No	Laparoscopic surgery	Non-general anesthesia	≥270min	＜100ml	Yes	No	Yes	No	No	Yes	≥30g/L	＜30g/L	Cardiovascular surgery	≥36℃	＜40	No	Yes	No	No	Internal validation set
553	Male	＜65	＜3	＜25kg/m2	No	No	Yes	No	No	Yes	No	Open surgery	Non-general anesthesia	＜270min	≥100ml	No	No	Yes	Yes	No	Yes	≥30g/L	≥30g/L	Urological surgery	≥36℃	＜40	No	No	Yes	No	Internal validation set
554	Female	≥65	＜3	≥25kg/m2	No	No	Yes	Yes	No	No	No	Open surgery	Non-general anesthesia	＜270min	≥100ml	No	No	Yes	No	Yes	Yes	＜30g/L	＜30g/L	Orthopedic surgery	＜36℃	≥40	Yes	No	Yes	No	Internal validation set
555	Male	≥65	＜3	≥25kg/m2	No	No	No	Yes	No	No	No	Laparoscopic surgery	Non-general anesthesia	＜270min	＜100ml	Yes	No	Yes	No	Yes	Yes	＜30g/L	≥30g/L	Urological surgery	≥36℃	≥40	No	No	Yes	No	Internal validation set
556	Male	≥65	＜3	≥25kg/m2	Yes	Yes	Yes	No	No	No	No	Open surgery	Non-general anesthesia	＜270min	≥100ml	Yes	No	No	No	No	No	≥30g/L	≥30g/L	Gastrointestinal surgery	＜36℃	＜40	No	No	Yes	No	Internal validation set
557	Female	≥65	＜3	≥25kg/m2	No	No	Yes	Yes	No	No	No	Laparoscopic surgery	Non-general anesthesia	＜270min	＜100ml	No	No	No	Yes	No	No	＜30g/L	＜30g/L	Urological surgery	＜36℃	≥40	Yes	No	No	No	Internal validation set
558	Male	≥65	＜3	≥25kg/m2	Yes	Yes	No	No	No	No	No	Open surgery	Non-general anesthesia	＜270min	＜100ml	Yes	Yes	No	Yes	No	No	≥30g/L	＜30g/L	Cardiovascular surgery	≥36℃	＜40	Yes	No	No	No	Internal validation set
559	Male	＜65	＜3	＜25kg/m2	No	Yes	Yes	No	No	No	No	Open surgery	Non-general anesthesia	≥270min	≥100ml	Yes	Yes	No	No	Yes	No	≥30g/L	＜30g/L	Orthopedic surgery	≥36℃	≥40	No	No	No	No	Internal validation set
560	Female	≥65	＜3	＜25kg/m2	No	No	No	No	No	Yes	No	Open surgery	Non-general anesthesia	≥270min	≥100ml	No	No	No	Yes	Yes	Yes	＜30g/L	＜30g/L	Other surgery	＜36℃	＜40	Yes	No	No	No	Internal validation set
561	Female	≥65	＜3	≥25kg/m2	No	Yes	No	Yes	No	Yes	No	Laparoscopic surgery	Non-general anesthesia	＜270min	＜100ml	Yes	Yes	Yes	No	No	No	＜30g/L	≥30g/L	Orthopedic surgery	＜36℃	≥40	Yes	No	Yes	No	Internal validation set
562	Male	≥65	＜3	＜25kg/m2	No	No	No	Yes	No	No	No	Open surgery	General anesthesia	≥270min	＜100ml	No	Yes	Yes	No	No	Yes	≥30g/L	＜30g/L	Cardiovascular surgery	＜36℃	＜40	Yes	Yes	No	No	Internal validation set
563	Male	≥65	＜3	＜25kg/m2	Yes	No	Yes	No	Yes	Yes	No	Open surgery	General anesthesia	≥270min	＜100ml	No	No	Yes	Yes	No	Yes	≥30g/L	＜30g/L	Gastrointestinal surgery	＜36℃	≥40	Yes	No	No	No	Internal validation set
564	Male	≥65	＜3	＜25kg/m2	Yes	No	Yes	Yes	No	No	No	Laparoscopic surgery	General anesthesia	＜270min	＜100ml	No	Yes	Yes	Yes	No	No	≥30g/L	＜30g/L	Urological surgery	＜36℃	＜40	Yes	No	Yes	No	Internal validation set
565	Male	≥65	≥3	＜25kg/m2	Yes	No	No	No	No	No	Yes	Open surgery	Non-general anesthesia	≥270min	＜100ml	Yes	No	No	No	No	Yes	＜30g/L	≥30g/L	Gastrointestinal surgery	＜36℃	≥40	Yes	Yes	No	No	Internal validation set
566	Female	≥65	＜3	≥25kg/m2	No	Yes	Yes	No	No	Yes	No	Open surgery	Non-general anesthesia	＜270min	＜100ml	Yes	No	Yes	Yes	No	No	≥30g/L	＜30g/L	Cardiovascular surgery	＜36℃	＜40	No	Yes	Yes	No	Internal validation set
567	Male	≥65	＜3	≥25kg/m2	No	No	Yes	Yes	No	Yes	Yes	Laparoscopic surgery	General anesthesia	＜270min	＜100ml	No	No	Yes	Yes	No	No	≥30g/L	≥30g/L	Urological surgery	＜36℃	＜40	No	No	No	No	Internal validation set
568	Male	≥65	＜3	＜25kg/m2	No	No	Yes	Yes	No	No	No	Open surgery	Non-general anesthesia	＜270min	＜100ml	No	Yes	Yes	No	Yes	No	＜30g/L	＜30g/L	Other surgery	≥36℃	＜40	No	No	Yes	No	Internal validation set
569	Female	＜65	≥3	＜25kg/m2	No	No	No	No	No	Yes	No	Open surgery	Non-general anesthesia	≥270min	＜100ml	No	Yes	Yes	No	Yes	Yes	＜30g/L	≥30g/L	Other surgery	＜36℃	＜40	No	No	Yes	No	Internal validation set
570	Female	＜65	≥3	＜25kg/m2	Yes	No	No	No	No	Yes	No	Open surgery	Non-general anesthesia	≥270min	≥100ml	No	No	Yes	No	No	Yes	≥30g/L	＜30g/L	Gastrointestinal surgery	＜36℃	＜40	No	No	No	No	Internal validation set
571	Male	＜65	＜3	＜25kg/m2	No	Yes	No	No	No	No	No	Open surgery	Non-general anesthesia	＜270min	＜100ml	No	Yes	No	No	No	No	＜30g/L	＜30g/L	Cardiovascular surgery	＜36℃	≥40	Yes	No	Yes	No	Internal validation set
572	Male	≥65	＜3	＜25kg/m2	No	No	No	No	No	Yes	No	Open surgery	Non-general anesthesia	≥270min	≥100ml	No	No	No	No	No	No	＜30g/L	＜30g/L	Urological surgery	≥36℃	≥40	Yes	Yes	No	No	Internal validation set
573	Female	≥65	＜3	＜25kg/m2	Yes	No	No	No	No	No	No	Open surgery	Non-general anesthesia	＜270min	＜100ml	No	No	No	No	No	Yes	≥30g/L	＜30g/L	Orthopedic surgery	≥36℃	＜40	Yes	No	Yes	No	Internal validation set
574	Male	≥65	≥3	≥25kg/m2	No	No	No	No	No	No	No	Open surgery	Non-general anesthesia	＜270min	＜100ml	No	Yes	No	Yes	Yes	No	＜30g/L	≥30g/L	Gastrointestinal surgery	≥36℃	＜40	Yes	No	No	No	Internal validation set
575	Male	≥65	≥3	≥25kg/m2	No	Yes	No	Yes	Yes	No	No	Laparoscopic surgery	Non-general anesthesia	≥270min	＜100ml	Yes	Yes	No	Yes	Yes	Yes	≥30g/L	≥30g/L	Cardiovascular surgery	≥36℃	≥40	No	No	Yes	No	Internal validation set
576	Male	≥65	≥3	≥25kg/m2	Yes	Yes	No	Yes	No	Yes	No	Open surgery	Non-general anesthesia	≥270min	＜100ml	No	No	Yes	No	No	No	＜30g/L	＜30g/L	Gastrointestinal surgery	≥36℃	＜40	Yes	No	Yes	No	Internal validation set
577	Female	＜65	≥3	＜25kg/m2	Yes	No	No	No	No	Yes	No	Open surgery	Non-general anesthesia	＜270min	≥100ml	No	No	Yes	Yes	No	No	≥30g/L	＜30g/L	Orthopedic surgery	＜36℃	≥40	No	No	Yes	No	Internal validation set
578	Male	＜65	≥3	＜25kg/m2	No	Yes	No	No	No	No	No	Open surgery	Non-general anesthesia	＜270min	≥100ml	No	No	Yes	Yes	No	Yes	＜30g/L	＜30g/L	Cardiovascular surgery	＜36℃	≥40	Yes	No	No	No	Internal validation set
579	Male	＜65	≥3	＜25kg/m2	No	No	No	No	No	No	No	Open surgery	Non-general anesthesia	＜270min	≥100ml	No	No	Yes	No	Yes	No	≥30g/L	＜30g/L	Gastrointestinal surgery	＜36℃	＜40	Yes	No	No	No	Internal validation set
580	Female	＜65	＜3	＜25kg/m2	Yes	No	Yes	No	No	No	No	Open surgery	Non-general anesthesia	＜270min	＜100ml	Yes	No	Yes	Yes	Yes	No	＜30g/L	≥30g/L	Urological surgery	≥36℃	＜40	Yes	Yes	No	No	Internal validation set
581	Female	＜65	＜3	≥25kg/m2	Yes	No	Yes	No	Yes	No	No	Open surgery	Non-general anesthesia	＜270min	＜100ml	No	No	No	No	No	No	＜30g/L	≥30g/L	Urological surgery	≥36℃	＜40	Yes	Yes	Yes	No	Internal validation set
582	Male	＜65	＜3	≥25kg/m2	Yes	No	No	Yes	No	No	Yes	Laparoscopic surgery	Non-general anesthesia	＜270min	＜100ml	No	Yes	No	No	No	Yes	＜30g/L	＜30g/L	Gastrointestinal surgery	＜36℃	＜40	No	Yes	No	No	Internal validation set
583	Male	＜65	≥3	＜25kg/m2	Yes	Yes	Yes	Yes	No	No	No	Open surgery	General anesthesia	＜270min	＜100ml	No	Yes	No	No	Yes	Yes	＜30g/L	≥30g/L	Gastrointestinal surgery	＜36℃	≥40	No	No	No	No	Internal validation set
584	Male	＜65	≥3	≥25kg/m2	Yes	No	Yes	No	No	No	No	Open surgery	General anesthesia	＜270min	＜100ml	No	No	Yes	Yes	Yes	Yes	＜30g/L	≥30g/L	Cardiovascular surgery	≥36℃	＜40	Yes	No	Yes	No	Internal validation set
585	Male	＜65	≥3	≥25kg/m2	No	No	No	Yes	No	No	Yes	Laparoscopic surgery	General anesthesia	＜270min	＜100ml	No	No	Yes	Yes	No	No	≥30g/L	＜30g/L	Gastrointestinal surgery	＜36℃	＜40	No	No	Yes	No	Internal validation set
586	Female	＜65	≥3	≥25kg/m2	No	No	Yes	Yes	No	No	Yes	Laparoscopic surgery	Non-general anesthesia	＜270min	＜100ml	No	No	Yes	No	No	Yes	≥30g/L	＜30g/L	Cardiovascular surgery	＜36℃	＜40	Yes	No	No	No	Internal validation set
587	Male	＜65	≥3	≥25kg/m2	No	No	No	No	No	No	No	Open surgery	Non-general anesthesia	＜270min	＜100ml	No	No	Yes	Yes	No	Yes	＜30g/L	≥30g/L	Gastrointestinal surgery	≥36℃	≥40	Yes	Yes	No	No	Internal validation set
588	Female	＜65	＜3	≥25kg/m2	No	Yes	No	Yes	No	No	No	Laparoscopic surgery	General anesthesia	＜270min	＜100ml	No	No	Yes	No	No	No	≥30g/L	＜30g/L	Urological surgery	＜36℃	＜40	Yes	No	No	No	Internal validation set
589	Male	＜65	＜3	≥25kg/m2	Yes	No	No	No	No	No	No	Open surgery	Non-general anesthesia	＜270min	＜100ml	No	Yes	No	No	No	Yes	＜30g/L	＜30g/L	Gastrointestinal surgery	＜36℃	≥40	Yes	No	No	No	Internal validation set
590	Male	≥65	＜3	≥25kg/m2	No	No	Yes	No	No	No	No	Open surgery	Non-general anesthesia	＜270min	＜100ml	No	Yes	No	Yes	No	Yes	≥30g/L	≥30g/L	Cardiovascular surgery	＜36℃	＜40	Yes	No	No	No	Internal validation set
591	Female	≥65	＜3	＜25kg/m2	No	No	Yes	No	No	No	No	Open surgery	Non-general anesthesia	＜270min	＜100ml	No	No	No	Yes	No	Yes	＜30g/L	≥30g/L	Gastrointestinal surgery	≥36℃	≥40	Yes	No	No	No	Internal validation set
592	Female	≥65	＜3	＜25kg/m2	No	Yes	No	Yes	No	No	No	Laparoscopic surgery	Non-general anesthesia	＜270min	≥100ml	No	Yes	No	No	Yes	Yes	≥30g/L	≥30g/L	Gastrointestinal surgery	＜36℃	≥40	Yes	Yes	Yes	No	Internal validation set
593	Male	≥65	＜3	≥25kg/m2	No	Yes	Yes	Yes	No	No	No	Laparoscopic surgery	Non-general anesthesia	＜270min	＜100ml	No	Yes	No	No	No	No	＜30g/L	＜30g/L	Gastrointestinal surgery	＜36℃	≥40	No	Yes	No	No	Internal validation set
594	Male	≥65	≥3	＜25kg/m2	No	No	No	No	No	Yes	No	Open surgery	Non-general anesthesia	＜270min	≥100ml	Yes	No	Yes	No	No	Yes	＜30g/L	≥30g/L	Gastrointestinal surgery	≥36℃	＜40	No	Yes	No	No	Internal validation set
595	Female	＜65	≥3	＜25kg/m2	Yes	Yes	Yes	Yes	No	Yes	No	Open surgery	Non-general anesthesia	＜270min	＜100ml	No	Yes	Yes	No	Yes	No	≥30g/L	≥30g/L	Urological surgery	＜36℃	＜40	Yes	Yes	Yes	No	Internal validation set
596	Male	≥65	＜3	＜25kg/m2	Yes	No	No	No	No	No	No	Open surgery	General anesthesia	＜270min	＜100ml	No	No	Yes	No	No	Yes	＜30g/L	＜30g/L	Orthopedic surgery	＜36℃	≥40	Yes	No	No	No	Internal validation set
597	Male	≥65	＜3	≥25kg/m2	Yes	No	No	No	Yes	Yes	No	Open surgery	Non-general anesthesia	＜270min	＜100ml	Yes	No	Yes	No	No	Yes	≥30g/L	≥30g/L	Gastrointestinal surgery	≥36℃	≥40	No	Yes	Yes	No	Internal validation set
598	Female	≥65	＜3	≥25kg/m2	No	No	Yes	Yes	No	No	No	Open surgery	Non-general anesthesia	＜270min	＜100ml	Yes	No	Yes	Yes	Yes	No	≥30g/L	≥30g/L	Gastrointestinal surgery	＜36℃	＜40	No	No	No	No	Internal validation set
599	Female	≥65	＜3	≥25kg/m2	Yes	No	No	Yes	No	No	No	Laparoscopic surgery	General anesthesia	＜270min	≥100ml	No	Yes	Yes	Yes	Yes	No	＜30g/L	≥30g/L	Orthopedic surgery	＜36℃	≥40	Yes	No	No	No	Internal validation set
600	Male	≥65	＜3	＜25kg/m2	Yes	Yes	No	No	No	Yes	No	Open surgery	General anesthesia	＜270min	≥100ml	No	Yes	Yes	No	No	Yes	＜30g/L	≥30g/L	Orthopedic surgery	＜36℃	＜40	Yes	Yes	No	No	Internal validation set
601	Male	≥65	＜3	＜25kg/m2	Yes	No	No	No	No	Yes	No	Open surgery	Non-general anesthesia	＜270min	≥100ml	No	No	Yes	No	No	Yes	＜30g/L	≥30g/L	Other surgery	＜36℃	≥40	Yes	Yes	Yes	No	Internal validation set
602	Male	≥65	≥3	≥25kg/m2	Yes	No	No	No	No	No	No	Open surgery	Non-general anesthesia	＜270min	＜100ml	No	Yes	Yes	No	Yes	Yes	＜30g/L	＜30g/L	Cardiovascular surgery	≥36℃	＜40	Yes	No	No	No	Internal validation set
603	Female	≥65	≥3	≥25kg/m2	No	No	No	No	Yes	No	No	Open surgery	General anesthesia	＜270min	＜100ml	No	No	Yes	No	No	No	＜30g/L	＜30g/L	Urological surgery	＜36℃	＜40	Yes	Yes	No	No	Internal validation set
604	Male	≥65	＜3	＜25kg/m2	No	No	No	No	No	No	No	Open surgery	General anesthesia	＜270min	＜100ml	No	No	Yes	No	No	No	≥30g/L	＜30g/L	Cardiovascular surgery	＜36℃	≥40	No	Yes	Yes	No	Internal validation set
605	Male	＜65	＜3	＜25kg/m2	No	Yes	No	No	No	Yes	No	Open surgery	General anesthesia	＜270min	≥100ml	No	Yes	Yes	Yes	Yes	Yes	≥30g/L	≥30g/L	Orthopedic surgery	≥36℃	＜40	Yes	Yes	Yes	No	Internal validation set
606	Female	＜65	≥3	≥25kg/m2	No	No	No	Yes	No	Yes	No	Open surgery	Non-general anesthesia	＜270min	≥100ml	No	Yes	No	Yes	Yes	No	＜30g/L	≥30g/L	Cardiovascular surgery	＜36℃	＜40	No	No	No	No	Internal validation set
607	Male	＜65	≥3	＜25kg/m2	No	Yes	No	Yes	No	No	No	Open surgery	Non-general anesthesia	＜270min	＜100ml	No	No	No	No	No	Yes	＜30g/L	＜30g/L	Cardiovascular surgery	≥36℃	＜40	No	Yes	No	No	Internal validation set
608	Male	≥65	＜3	≥25kg/m2	No	Yes	Yes	No	No	No	No	Open surgery	General anesthesia	＜270min	≥100ml	No	No	No	Yes	No	No	≥30g/L	＜30g/L	Other surgery	＜36℃	≥40	No	Yes	No	No	Internal validation set
609	Female	≥65	≥3	≥25kg/m2	No	No	Yes	No	No	No	No	Open surgery	Non-general anesthesia	＜270min	≥100ml	No	No	No	Yes	No	No	≥30g/L	＜30g/L	Orthopedic surgery	≥36℃	≥40	No	No	Yes	No	Internal validation set
610	Male	≥65	≥3	＜25kg/m2	Yes	Yes	No	No	No	No	No	Open surgery	General anesthesia	＜270min	＜100ml	No	No	No	No	No	No	＜30g/L	≥30g/L	Cardiovascular surgery	≥36℃	≥40	No	No	Yes	No	Internal validation set
611	Male	≥65	＜3	＜25kg/m2	Yes	No	Yes	No	No	No	No	Open surgery	General anesthesia	＜270min	＜100ml	No	No	Yes	Yes	No	Yes	＜30g/L	＜30g/L	Orthopedic surgery	＜36℃	≥40	No	Yes	Yes	No	Internal validation set
612	Male	≥65	≥3	≥25kg/m2	Yes	No	Yes	No	Yes	No	No	Open surgery	General anesthesia	＜270min	＜100ml	No	No	Yes	No	No	Yes	≥30g/L	≥30g/L	Gastrointestinal surgery	≥36℃	≥40	Yes	No	Yes	No	Internal validation set
613	Female	＜65	＜3	＜25kg/m2	Yes	No	No	Yes	Yes	Yes	No	Laparoscopic surgery	Non-general anesthesia	＜270min	＜100ml	No	Yes	Yes	No	No	Yes	＜30g/L	≥30g/L	Gastrointestinal surgery	≥36℃	＜40	Yes	Yes	No	No	Internal validation set
614	Male	＜65	＜3	＜25kg/m2	No	No	Yes	Yes	No	Yes	No	Open surgery	Non-general anesthesia	＜270min	＜100ml	No	Yes	Yes	No	No	Yes	＜30g/L	≥30g/L	Gastrointestinal surgery	≥36℃	＜40	No	No	No	No	Internal validation set
615	Male	≥65	＜3	≥25kg/m2	No	Yes	No	No	No	No	No	Open surgery	Non-general anesthesia	＜270min	＜100ml	No	No	No	Yes	No	No	＜30g/L	≥30g/L	Urological surgery	≥36℃	＜40	Yes	Yes	Yes	No	Internal validation set
616	Male	≥65	≥3	＜25kg/m2	Yes	No	No	Yes	No	No	No	Open surgery	Non-general anesthesia	＜270min	＜100ml	No	No	Yes	Yes	No	No	≥30g/L	＜30g/L	Orthopedic surgery	＜36℃	≥40	No	Yes	Yes	No	Internal validation set
617	Female	≥65	≥3	＜25kg/m2	Yes	No	No	Yes	No	No	No	Laparoscopic surgery	General anesthesia	≥270min	＜100ml	No	No	Yes	No	No	No	≥30g/L	≥30g/L	Orthopedic surgery	＜36℃	＜40	No	Yes	Yes	No	Internal validation set
618	Male	≥65	＜3	≥25kg/m2	Yes	No	Yes	No	No	No	No	Open surgery	Non-general anesthesia	≥270min	＜100ml	No	No	Yes	Yes	No	Yes	＜30g/L	＜30g/L	Orthopedic surgery	≥36℃	≥40	Yes	Yes	No	No	Internal validation set
619	Male	＜65	≥3	＜25kg/m2	No	No	Yes	Yes	No	No	No	Laparoscopic surgery	Non-general anesthesia	＜270min	≥100ml	No	No	Yes	No	No	No	≥30g/L	≥30g/L	Orthopedic surgery	＜36℃	≥40	Yes	No	Yes	No	Internal validation set
620	Male	＜65	≥3	≥25kg/m2	No	Yes	No	No	No	No	No	Open surgery	General anesthesia	＜270min	＜100ml	Yes	No	Yes	No	No	No	＜30g/L	＜30g/L	Orthopedic surgery	≥36℃	≥40	Yes	No	Yes	No	Internal validation set
621	Female	＜65	≥3	≥25kg/m2	No	No	Yes	No	No	No	No	Open surgery	General anesthesia	＜270min	≥100ml	No	No	Yes	Yes	Yes	No	＜30g/L	≥30g/L	Urological surgery	＜36℃	＜40	Yes	Yes	Yes	No	Internal validation set
622	Male	＜65	≥3	＜25kg/m2	Yes	No	No	No	No	No	No	Open surgery	Non-general anesthesia	＜270min	＜100ml	Yes	No	Yes	Yes	Yes	No	≥30g/L	＜30g/L	Gastrointestinal surgery	＜36℃	≥40	No	Yes	Yes	No	Internal validation set
623	Male	＜65	≥3	＜25kg/m2	No	No	Yes	Yes	No	No	No	Laparoscopic surgery	Non-general anesthesia	≥270min	＜100ml	No	No	Yes	No	No	Yes	≥30g/L	≥30g/L	Urological surgery	≥36℃	≥40	Yes	No	Yes	No	Internal validation set
624	Male	＜65	≥3	＜25kg/m2	No	No	Yes	Yes	No	No	No	Open surgery	Non-general anesthesia	＜270min	＜100ml	No	No	No	No	Yes	Yes	≥30g/L	≥30g/L	Cardiovascular surgery	≥36℃	＜40	No	No	No	No	Internal validation set
625	Female	≥65	≥3	＜25kg/m2	No	No	No	No	No	No	No	Open surgery	General anesthesia	＜270min	＜100ml	Yes	No	No	No	No	No	≥30g/L	≥30g/L	Cardiovascular surgery	＜36℃	≥40	Yes	Yes	Yes	No	Internal validation set
626	Male	≥65	≥3	≥25kg/m2	No	No	Yes	Yes	No	No	No	Open surgery	General anesthesia	＜270min	≥100ml	Yes	No	No	No	No	No	＜30g/L	≥30g/L	Other surgery	≥36℃	＜40	No	No	Yes	No	Internal validation set
627	Male	≥65	＜3	≥25kg/m2	No	No	No	No	No	No	No	Open surgery	Non-general anesthesia	≥270min	≥100ml	No	Yes	No	No	No	Yes	≥30g/L	＜30g/L	Cardiovascular surgery	≥36℃	＜40	Yes	No	Yes	No	Internal validation set
628	Male	≥65	＜3	＜25kg/m2	No	Yes	No	No	Yes	No	No	Open surgery	Non-general anesthesia	≥270min	≥100ml	No	Yes	No	No	Yes	Yes	≥30g/L	≥30g/L	Cardiovascular surgery	＜36℃	＜40	Yes	Yes	No	No	Internal validation set
629	Male	＜65	＜3	＜25kg/m2	No	Yes	Yes	Yes	No	No	No	Laparoscopic surgery	Non-general anesthesia	＜270min	＜100ml	No	No	Yes	Yes	Yes	No	＜30g/L	＜30g/L	Gastrointestinal surgery	＜36℃	≥40	No	Yes	Yes	No	Internal validation set
630	Male	＜65	≥3	≥25kg/m2	No	No	Yes	Yes	No	Yes	No	Open surgery	Non-general anesthesia	≥270min	＜100ml	No	Yes	Yes	Yes	No	No	≥30g/L	≥30g/L	Orthopedic surgery	≥36℃	≥40	No	Yes	No	No	Internal validation set
631	Male	＜65	≥3	≥25kg/m2	Yes	No	No	No	No	Yes	No	Open surgery	Non-general anesthesia	＜270min	＜100ml	No	Yes	Yes	No	Yes	No	＜30g/L	≥30g/L	Orthopedic surgery	≥36℃	≥40	Yes	Yes	Yes	No	Internal validation set
632	Female	＜65	≥3	＜25kg/m2	No	No	No	No	No	No	No	Open surgery	Non-general anesthesia	＜270min	＜100ml	No	No	Yes	No	No	Yes	≥30g/L	＜30g/L	Gastrointestinal surgery	＜36℃	≥40	No	No	Yes	No	Internal validation set
633	Male	≥65	≥3	≥25kg/m2	No	No	No	No	No	No	No	Laparoscopic surgery	General anesthesia	≥270min	＜100ml	No	Yes	No	No	No	Yes	≥30g/L	≥30g/L	Orthopedic surgery	＜36℃	＜40	No	No	No	No	Internal validation set
634	Male	≥65	≥3	＜25kg/m2	Yes	No	No	No	No	No	No	Laparoscopic surgery	General anesthesia	≥270min	＜100ml	No	No	No	No	Yes	Yes	≥30g/L	≥30g/L	Other surgery	≥36℃	＜40	Yes	Yes	No	No	Internal validation set
635	Male	≥65	≥3	≥25kg/m2	Yes	No	Yes	No	No	No	No	Laparoscopic surgery	Non-general anesthesia	＜270min	＜100ml	No	Yes	No	No	Yes	No	≥30g/L	≥30g/L	Orthopedic surgery	＜36℃	＜40	No	No	Yes	No	Internal validation set
636	Female	＜65	＜3	≥25kg/m2	No	Yes	No	No	No	No	No	Laparoscopic surgery	Non-general anesthesia	＜270min	＜100ml	No	No	Yes	No	No	No	≥30g/L	＜30g/L	Orthopedic surgery	＜36℃	≥40	No	Yes	Yes	No	Internal validation set
637	Male	＜65	≥3	≥25kg/m2	No	No	No	Yes	No	Yes	No	Laparoscopic surgery	Non-general anesthesia	＜270min	＜100ml	No	Yes	Yes	No	No	No	＜30g/L	＜30g/L	Urological surgery	＜36℃	≥40	Yes	Yes	Yes	No	Internal validation set
638	Male	＜65	≥3	＜25kg/m2	Yes	Yes	No	Yes	No	No	No	Open surgery	Non-general anesthesia	＜270min	＜100ml	No	Yes	Yes	No	No	No	＜30g/L	≥30g/L	Urological surgery	＜36℃	＜40	Yes	No	No	No	Internal validation set
639	Male	＜65	≥3	≥25kg/m2	No	No	No	No	No	No	No	Open surgery	General anesthesia	＜270min	＜100ml	Yes	No	Yes	No	No	Yes	＜30g/L	＜30g/L	Gastrointestinal surgery	≥36℃	＜40	Yes	Yes	Yes	No	Internal validation set
640	Female	＜65	≥3	＜25kg/m2	No	No	Yes	No	Yes	No	No	Open surgery	General anesthesia	＜270min	＜100ml	Yes	No	Yes	No	No	No	＜30g/L	＜30g/L	Urological surgery	＜36℃	＜40	No	No	Yes	No	Internal validation set
641	Female	＜65	＜3	＜25kg/m2	No	No	No	No	No	Yes	No	Open surgery	General anesthesia	＜270min	＜100ml	No	No	No	No	Yes	No	≥30g/L	＜30g/L	Cardiovascular surgery	≥36℃	≥40	Yes	No	No	No	Internal validation set
642	Male	≥65	＜3	≥25kg/m2	Yes	Yes	No	No	No	Yes	No	Open surgery	Non-general anesthesia	＜270min	＜100ml	Yes	No	No	No	No	No	≥30g/L	＜30g/L	Other surgery	≥36℃	＜40	Yes	Yes	No	No	Internal validation set
643	Female	≥65	＜3	＜25kg/m2	Yes	Yes	No	No	No	No	No	Laparoscopic surgery	Non-general anesthesia	＜270min	≥100ml	Yes	Yes	No	Yes	Yes	No	＜30g/L	≥30g/L	Urological surgery	≥36℃	≥40	Yes	Yes	Yes	No	Internal validation set
644	Male	≥65	≥3	≥25kg/m2	Yes	No	No	No	No	Yes	No	Laparoscopic surgery	General anesthesia	＜270min	＜100ml	No	No	No	Yes	No	No	＜30g/L	＜30g/L	Urological surgery	≥36℃	＜40	No	Yes	Yes	No	Internal validation set
645	Male	≥65	≥3	≥25kg/m2	No	Yes	No	No	No	No	No	Laparoscopic surgery	Non-general anesthesia	＜270min	≥100ml	No	Yes	No	No	No	Yes	＜30g/L	＜30g/L	Urological surgery	＜36℃	≥40	Yes	No	No	No	Internal validation set
646	Female	≥65	≥3	≥25kg/m2	No	No	No	No	Yes	No	No	Laparoscopic surgery	Non-general anesthesia	＜270min	＜100ml	No	No	Yes	Yes	No	Yes	＜30g/L	≥30g/L	Orthopedic surgery	＜36℃	≥40	Yes	Yes	Yes	No	Internal validation set
647	Male	＜65	≥3	＜25kg/m2	Yes	No	No	No	No	Yes	No	Open surgery	General anesthesia	＜270min	＜100ml	No	Yes	Yes	Yes	No	No	＜30g/L	≥30g/L	Orthopedic surgery	≥36℃	＜40	No	Yes	No	No	Internal validation set
648	Female	＜65	≥3	＜25kg/m2	Yes	No	Yes	No	No	Yes	No	Laparoscopic surgery	Non-general anesthesia	＜270min	＜100ml	No	No	Yes	No	No	Yes	＜30g/L	≥30g/L	Orthopedic surgery	＜36℃	＜40	Yes	No	No	No	Internal validation set
649	Male	＜65	＜3	≥25kg/m2	Yes	No	Yes	No	No	No	No	Laparoscopic surgery	Non-general anesthesia	＜270min	＜100ml	No	No	Yes	Yes	No	No	≥30g/L	＜30g/L	Orthopedic surgery	≥36℃	≥40	No	No	No	No	Internal validation set
650	Female	＜65	＜3	≥25kg/m2	No	Yes	No	No	No	No	No	Laparoscopic surgery	General anesthesia	＜270min	≥100ml	No	Yes	No	No	No	Yes	≥30g/L	≥30g/L	Gastrointestinal surgery	≥36℃	＜40	Yes	Yes	No	No	Internal validation set
651	Male	＜65	＜3	＜25kg/m2	No	No	No	Yes	No	No	No	Laparoscopic surgery	General anesthesia	＜270min	＜100ml	No	No	Yes	Yes	No	No	＜30g/L	＜30g/L	Gastrointestinal surgery	≥36℃	≥40	No	Yes	Yes	No	Internal validation set
652	Female	≥65	＜3	＜25kg/m2	No	No	No	Yes	No	Yes	No	Laparoscopic surgery	Non-general anesthesia	＜270min	＜100ml	No	No	Yes	No	Yes	No	＜30g/L	＜30g/L	Orthopedic surgery	≥36℃	＜40	Yes	Yes	No	No	Internal validation set
653	Male	≥65	＜3	≥25kg/m2	No	No	No	No	No	No	No	Open surgery	Non-general anesthesia	≥270min	＜100ml	No	No	Yes	Yes	Yes	No	≥30g/L	＜30g/L	Urological surgery	＜36℃	＜40	Yes	No	Yes	No	Internal validation set
654	Female	≥65	＜3	≥25kg/m2	No	No	No	Yes	Yes	Yes	No	Open surgery	Non-general anesthesia	＜270min	＜100ml	No	No	No	Yes	No	No	≥30g/L	＜30g/L	Gastrointestinal surgery	≥36℃	≥40	No	No	No	No	Internal validation set
655	Male	≥65	＜3	＜25kg/m2	Yes	Yes	No	Yes	No	Yes	No	Open surgery	General anesthesia	＜270min	＜100ml	No	No	No	No	No	No	≥30g/L	≥30g/L	Gastrointestinal surgery	＜36℃	＜40	Yes	Yes	Yes	No	Internal validation set
656	Male	≥65	＜3	＜25kg/m2	No	No	No	No	No	No	No	Open surgery	General anesthesia	≥270min	＜100ml	No	Yes	Yes	No	No	No	≥30g/L	＜30g/L	Orthopedic surgery	＜36℃	≥40	No	No	Yes	No	Internal validation set
657	Male	≥65	≥3	＜25kg/m2	No	No	Yes	Yes	No	Yes	No	Open surgery	Non-general anesthesia	＜270min	＜100ml	No	Yes	Yes	No	No	No	＜30g/L	≥30g/L	Gastrointestinal surgery	≥36℃	＜40	No	Yes	Yes	No	Internal validation set
658	Male	≥65	＜3	＜25kg/m2	No	No	No	No	No	No	No	Laparoscopic surgery	Non-general anesthesia	＜270min	＜100ml	No	Yes	Yes	No	No	Yes	≥30g/L	＜30g/L	Gastrointestinal surgery	≥36℃	≥40	Yes	No	Yes	No	Internal validation set
659	Male	≥65	＜3	≥25kg/m2	No	No	Yes	Yes	No	Yes	No	Laparoscopic surgery	General anesthesia	＜270min	≥100ml	No	No	Yes	Yes	No	Yes	＜30g/L	≥30g/L	Gastrointestinal surgery	≥36℃	≥40	No	No	Yes	No	Internal validation set
660	Female	≥65	＜3	＜25kg/m2	No	No	No	No	Yes	No	No	Laparoscopic surgery	General anesthesia	＜270min	＜100ml	No	No	Yes	No	No	Yes	≥30g/L	≥30g/L	Gastrointestinal surgery	≥36℃	≥40	Yes	Yes	Yes	No	Internal validation set
661	Male	≥65	＜3	＜25kg/m2	No	No	Yes	Yes	No	Yes	No	Laparoscopic surgery	General anesthesia	＜270min	≥100ml	No	No	No	Yes	No	No	≥30g/L	≥30g/L	Other surgery	≥36℃	≥40	No	No	Yes	No	Internal validation set
662	Male	≥65	＜3	＜25kg/m2	Yes	No	Yes	Yes	No	Yes	No	Laparoscopic surgery	Non-general anesthesia	＜270min	＜100ml	No	No	No	No	Yes	Yes	＜30g/L	＜30g/L	Urological surgery	≥36℃	＜40	No	Yes	No	No	Internal validation set
663	Male	≥65	＜3	≥25kg/m2	Yes	Yes	No	No	No	No	Yes	Open surgery	Non-general anesthesia	≥270min	＜100ml	No	Yes	No	Yes	Yes	Yes	＜30g/L	＜30g/L	Gastrointestinal surgery	＜36℃	≥40	No	Yes	Yes	No	Internal validation set
664	Female	＜65	＜3	≥25kg/m2	Yes	Yes	No	No	No	No	No	Open surgery	General anesthesia	≥270min	＜100ml	No	No	No	No	No	Yes	＜30g/L	＜30g/L	Gastrointestinal surgery	≥36℃	≥40	Yes	Yes	Yes	No	Internal validation set
665	Male	≥65	＜3	≥25kg/m2	Yes	No	No	No	No	No	No	Open surgery	Non-general anesthesia	＜270min	＜100ml	No	No	No	No	Yes	Yes	≥30g/L	＜30g/L	Gastrointestinal surgery	≥36℃	≥40	Yes	Yes	Yes	No	Internal validation set
666	Male	≥65	≥3	≥25kg/m2	No	No	No	No	No	No	Yes	Laparoscopic surgery	Non-general anesthesia	≥270min	≥100ml	No	No	Yes	Yes	No	No	＜30g/L	＜30g/L	Gastrointestinal surgery	＜36℃	≥40	No	Yes	No	No	Internal validation set
667	Male	＜65	＜3	＜25kg/m2	No	No	Yes	Yes	No	Yes	No	Laparoscopic surgery	Non-general anesthesia	＜270min	≥100ml	No	Yes	Yes	No	No	Yes	＜30g/L	≥30g/L	Gastrointestinal surgery	≥36℃	≥40	No	Yes	No	No	Internal validation set
668	Female	≥65	＜3	＜25kg/m2	No	No	No	No	No	No	No	Laparoscopic surgery	Non-general anesthesia	＜270min	≥100ml	No	Yes	Yes	No	No	No	＜30g/L	＜30g/L	Cardiovascular surgery	≥36℃	＜40	Yes	No	Yes	No	Internal validation set
669	Female	≥65	≥3	＜25kg/m2	No	Yes	No	Yes	Yes	Yes	No	Laparoscopic surgery	Non-general anesthesia	≥270min	＜100ml	No	Yes	Yes	No	No	No	≥30g/L	≥30g/L	Gastrointestinal surgery	≥36℃	＜40	Yes	No	Yes	No	Internal validation set
670	Male	≥65	≥3	≥25kg/m2	No	Yes	No	No	Yes	No	No	Laparoscopic surgery	Non-general anesthesia	≥270min	＜100ml	No	No	No	No	No	No	≥30g/L	＜30g/L	Orthopedic surgery	≥36℃	≥40	Yes	No	No	No	Internal validation set
671	Female	＜65	＜3	＜25kg/m2	No	No	No	Yes	No	Yes	No	Open surgery	Non-general anesthesia	＜270min	＜100ml	No	No	No	No	No	No	≥30g/L	＜30g/L	Cardiovascular surgery	＜36℃	≥40	No	No	No	No	Internal validation set
672	Male	≥65	＜3	≥25kg/m2	Yes	Yes	Yes	No	No	No	No	Open surgery	Non-general anesthesia	＜270min	≥100ml	No	No	No	Yes	No	Yes	≥30g/L	＜30g/L	Cardiovascular surgery	＜36℃	≥40	No	Yes	No	No	Internal validation set
673	Male	≥65	＜3	≥25kg/m2	Yes	No	No	No	No	No	Yes	Open surgery	Non-general anesthesia	＜270min	≥100ml	Yes	No	Yes	Yes	No	No	≥30g/L	≥30g/L	Urological surgery	≥36℃	＜40	Yes	Yes	No	No	Internal validation set
674	Female	≥65	＜3	≥25kg/m2	Yes	No	No	Yes	No	No	No	Open surgery	Non-general anesthesia	＜270min	≥100ml	No	Yes	No	Yes	No	Yes	≥30g/L	≥30g/L	Cardiovascular surgery	≥36℃	＜40	No	No	No	No	Internal validation set
675	Male	≥65	＜3	≥25kg/m2	No	No	No	No	No	No	No	Open surgery	General anesthesia	＜270min	＜100ml	Yes	Yes	No	No	No	Yes	＜30g/L	＜30g/L	Gastrointestinal surgery	＜36℃	≥40	Yes	No	Yes	No	Internal validation set
676	Female	≥65	＜3	≥25kg/m2	No	No	No	No	No	No	Yes	Laparoscopic surgery	Non-general anesthesia	≥270min	＜100ml	No	Yes	Yes	No	No	No	＜30g/L	＜30g/L	Gastrointestinal surgery	＜36℃	≥40	Yes	No	No	No	Internal validation set
677	Male	≥65	≥3	＜25kg/m2	No	Yes	No	No	No	No	Yes	Laparoscopic surgery	Non-general anesthesia	≥270min	＜100ml	No	No	Yes	No	No	No	≥30g/L	≥30g/L	Gastrointestinal surgery	＜36℃	＜40	No	No	No	No	Internal validation set
678	Female	≥65	＜3	＜25kg/m2	No	No	No	No	No	No	No	Laparoscopic surgery	General anesthesia	＜270min	＜100ml	No	No	Yes	No	No	Yes	≥30g/L	≥30g/L	Orthopedic surgery	＜36℃	＜40	No	No	Yes	No	Internal validation set
679	Male	≥65	≥3	＜25kg/m2	Yes	No	No	No	No	No	No	Laparoscopic surgery	General anesthesia	≥270min	≥100ml	No	No	Yes	Yes	No	No	＜30g/L	＜30g/L	Urological surgery	＜36℃	＜40	No	No	Yes	No	Internal validation set
680	Female	≥65	＜3	＜25kg/m2	No	No	Yes	Yes	No	Yes	No	Laparoscopic surgery	Non-general anesthesia	＜270min	＜100ml	No	No	Yes	No	No	No	≥30g/L	＜30g/L	Cardiovascular surgery	＜36℃	≥40	Yes	No	No	No	Internal validation set
681	Female	≥65	≥3	＜25kg/m2	No	No	Yes	Yes	No	No	No	Laparoscopic surgery	Non-general anesthesia	＜270min	＜100ml	No	No	No	No	No	Yes	＜30g/L	≥30g/L	Other surgery	≥36℃	≥40	Yes	Yes	No	No	Internal validation set
682	Male	≥65	≥3	＜25kg/m2	No	Yes	No	Yes	No	Yes	No	Laparoscopic surgery	Non-general anesthesia	≥270min	＜100ml	No	Yes	No	No	No	No	≥30g/L	≥30g/L	Cardiovascular surgery	≥36℃	＜40	Yes	Yes	No	No	Internal validation set
683	Female	≥65	＜3	＜25kg/m2	Yes	Yes	No	No	No	No	No	Laparoscopic surgery	General anesthesia	＜270min	≥100ml	No	No	No	Yes	No	Yes	＜30g/L	≥30g/L	Gastrointestinal surgery	＜36℃	≥40	No	Yes	Yes	No	Internal validation set
684	Female	≥65	≥3	≥25kg/m2	Yes	No	No	No	No	Yes	No	Laparoscopic surgery	General anesthesia	＜270min	≥100ml	No	Yes	No	Yes	No	No	≥30g/L	≥30g/L	Gastrointestinal surgery	≥36℃	＜40	No	No	Yes	No	Internal validation set
685	Female	≥65	＜3	＜25kg/m2	Yes	Yes	No	No	Yes	Yes	No	Laparoscopic surgery	Non-general anesthesia	＜270min	≥100ml	No	No	No	Yes	No	Yes	≥30g/L	＜30g/L	Cardiovascular surgery	＜36℃	≥40	Yes	Yes	No	No	Internal validation set
686	Female	≥65	≥3	＜25kg/m2	No	Yes	No	No	No	No	No	Laparoscopic surgery	Non-general anesthesia	≥270min	＜100ml	No	Yes	Yes	No	Yes	No	＜30g/L	＜30g/L	Other surgery	≥36℃	≥40	No	No	No	No	Internal validation set
687	Female	≥65	＜3	＜25kg/m2	No	No	Yes	Yes	No	No	No	Laparoscopic surgery	Non-general anesthesia	＜270min	＜100ml	No	No	Yes	No	No	Yes	≥30g/L	≥30g/L	Urological surgery	＜36℃	≥40	Yes	No	Yes	No	Internal validation set
688	Female	≥65	＜3	＜25kg/m2	No	Yes	No	No	No	No	No	Open surgery	Non-general anesthesia	≥270min	＜100ml	No	No	Yes	No	Yes	Yes	＜30g/L	≥30g/L	Urological surgery	＜36℃	≥40	Yes	Yes	No	No	Internal validation set
689	Female	≥65	＜3	＜25kg/m2	No	Yes	No	No	Yes	No	No	Open surgery	Non-general anesthesia	＜270min	＜100ml	No	Yes	Yes	No	No	No	≥30g/L	≥30g/L	Orthopedic surgery	＜36℃	＜40	No	No	No	No	Internal validation set
690	Male	≥65	＜3	≥25kg/m2	Yes	No	No	No	No	Yes	No	Open surgery	Non-general anesthesia	＜270min	≥100ml	Yes	No	No	Yes	No	No	＜30g/L	＜30g/L	Cardiovascular surgery	＜36℃	≥40	Yes	Yes	No	No	Internal validation set
691	Female	≥65	＜3	＜25kg/m2	Yes	Yes	Yes	Yes	No	No	No	Open surgery	General anesthesia	＜270min	≥100ml	No	No	No	Yes	No	Yes	＜30g/L	≥30g/L	Other surgery	＜36℃	≥40	No	No	Yes	No	Internal validation set
692	Female	≥65	＜3	＜25kg/m2	Yes	No	No	Yes	No	No	Yes	Open surgery	General anesthesia	＜270min	≥100ml	No	No	No	Yes	No	Yes	≥30g/L	＜30g/L	Orthopedic surgery	＜36℃	＜40	No	Yes	Yes	No	Internal validation set
693	Female	≥65	＜3	＜25kg/m2	No	No	No	Yes	No	No	Yes	Laparoscopic surgery	Non-general anesthesia	＜270min	＜100ml	Yes	No	Yes	No	No	No	＜30g/L	＜30g/L	Cardiovascular surgery	≥36℃	＜40	Yes	Yes	No	No	Internal validation set
694	Female	＜65	＜3	＜25kg/m2	No	Yes	No	No	No	No	No	Laparoscopic surgery	Non-general anesthesia	＜270min	＜100ml	Yes	No	Yes	No	No	No	≥30g/L	≥30g/L	Other surgery	≥36℃	≥40	No	Yes	Yes	No	Internal validation set
695	Female	＜65	＜3	＜25kg/m2	No	Yes	Yes	No	Yes	Yes	Yes	Laparoscopic surgery	Non-general anesthesia	＜270min	＜100ml	No	No	Yes	No	No	No	＜30g/L	＜30g/L	Orthopedic surgery	≥36℃	≥40	Yes	No	No	No	Internal validation set
696	Male	≥65	＜3	＜25kg/m2	No	No	No	No	No	No	No	Laparoscopic surgery	Non-general anesthesia	＜270min	＜100ml	No	No	Yes	No	No	No	≥30g/L	＜30g/L	Urological surgery	＜36℃	≥40	Yes	Yes	Yes	No	Internal validation set
697	Female	≥65	＜3	≥25kg/m2	No	Yes	No	No	No	No	No	Open surgery	Non-general anesthesia	≥270min	＜100ml	No	No	Yes	No	Yes	No	＜30g/L	≥30g/L	Orthopedic surgery	≥36℃	≥40	No	Yes	No	No	Internal validation set
698	Female	＜65	＜3	＜25kg/m2	No	No	No	Yes	No	No	No	Laparoscopic surgery	Non-general anesthesia	≥270min	≥100ml	No	Yes	No	Yes	Yes	No	＜30g/L	≥30g/L	Gastrointestinal surgery	＜36℃	＜40	Yes	Yes	No	No	Internal validation set
699	Female	≥65	＜3	＜25kg/m2	No	No	No	Yes	No	No	Yes	Laparoscopic surgery	Non-general anesthesia	＜270min	＜100ml	No	Yes	No	No	No	Yes	＜30g/L	≥30g/L	Gastrointestinal surgery	≥36℃	≥40	No	Yes	No	No	Internal validation set
700	Female	≥65	＜3	＜25kg/m2	No	No	Yes	Yes	No	No	Yes	Laparoscopic surgery	Non-general anesthesia	＜270min	≥100ml	No	Yes	No	Yes	No	Yes	＜30g/L	＜30g/L	Gastrointestinal surgery	＜36℃	≥40	No	No	No	No	Internal validation set
701	Female	＜65	≥3	＜25kg/m2	No	No	No	No	No	No	No	Laparoscopic surgery	Non-general anesthesia	＜270min	＜100ml	No	No	No	No	No	No	＜30g/L	＜30g/L	Cardiovascular surgery	≥36℃	＜40	Yes	Yes	No	No	Internal validation set
702	Female	≥65	≥3	＜25kg/m2	No	Yes	No	No	No	No	Yes	Laparoscopic surgery	Non-general anesthesia	＜270min	＜100ml	No	No	No	Yes	No	Yes	＜30g/L	＜30g/L	Orthopedic surgery	＜36℃	＜40	No	No	No	No	Internal validation set
703	Female	≥65	＜3	＜25kg/m2	Yes	No	No	No	No	Yes	No	Laparoscopic surgery	Non-general anesthesia	＜270min	＜100ml	No	No	Yes	No	No	No	＜30g/L	≥30g/L	Orthopedic surgery	≥36℃	＜40	No	Yes	No	No	Internal validation set
704	Female	≥65	＜3	＜25kg/m2	Yes	No	No	No	Yes	Yes	No	Laparoscopic surgery	Non-general anesthesia	＜270min	＜100ml	No	No	Yes	No	No	No	≥30g/L	≥30g/L	Orthopedic surgery	≥36℃	＜40	No	Yes	No	No	Internal validation set
705	Male	＜65	＜3	＜25kg/m2	Yes	No	No	No	Yes	Yes	Yes	Laparoscopic surgery	Non-general anesthesia	＜270min	＜100ml	No	Yes	Yes	Yes	No	Yes	＜30g/L	＜30g/L	Urological surgery	＜36℃	≥40	Yes	Yes	Yes	No	Internal validation set
706	Male	≥65	≥3	≥25kg/m2	No	No	No	Yes	No	Yes	Yes	Open surgery	Non-general anesthesia	＜270min	＜100ml	No	No	Yes	No	No	Yes	＜30g/L	＜30g/L	Other surgery	≥36℃	＜40	No	No	No	No	Internal validation set
707	Female	≥65	≥3	≥25kg/m2	No	Yes	No	No	No	No	No	Open surgery	Non-general anesthesia	≥270min	＜100ml	No	No	Yes	No	Yes	No	＜30g/L	＜30g/L	Urological surgery	＜36℃	＜40	Yes	Yes	No	No	Internal validation set
708	Female	≥65	＜3	＜25kg/m2	No	No	Yes	Yes	No	Yes	No	Open surgery	General anesthesia	≥270min	＜100ml	No	No	Yes	No	Yes	No	≥30g/L	≥30g/L	Cardiovascular surgery	＜36℃	＜40	No	No	Yes	No	Internal validation set
709	Female	≥65	≥3	≥25kg/m2	No	No	Yes	No	No	No	No	Open surgery	Non-general anesthesia	＜270min	≥100ml	No	Yes	Yes	No	No	Yes	＜30g/L	＜30g/L	Gastrointestinal surgery	≥36℃	＜40	No	Yes	Yes	No	Internal validation set
710	Female	≥65	≥3	≥25kg/m2	No	No	No	Yes	No	No	No	Open surgery	Non-general anesthesia	≥270min	＜100ml	No	Yes	No	No	Yes	No	≥30g/L	≥30g/L	Gastrointestinal surgery	＜36℃	≥40	Yes	No	No	No	Internal validation set
711	Female	≥65	＜3	≥25kg/m2	No	No	No	No	No	No	No	Laparoscopic surgery	General anesthesia	＜270min	≥100ml	No	Yes	No	No	No	No	＜30g/L	＜30g/L	Cardiovascular surgery	＜36℃	≥40	Yes	No	Yes	No	Internal validation set
712	Male	≥65	≥3	≥25kg/m2	Yes	No	Yes	No	No	No	Yes	Laparoscopic surgery	General anesthesia	＜270min	＜100ml	No	No	Yes	No	No	No	≥30g/L	≥30g/L	Gastrointestinal surgery	≥36℃	＜40	Yes	No	Yes	No	Internal validation set
713	Male	≥65	≥3	≥25kg/m2	Yes	No	Yes	Yes	No	Yes	No	Laparoscopic surgery	Non-general anesthesia	＜270min	＜100ml	No	No	Yes	No	No	Yes	≥30g/L	≥30g/L	Gastrointestinal surgery	＜36℃	≥40	No	No	No	No	Internal validation set
714	Female	≥65	＜3	＜25kg/m2	Yes	No	Yes	No	No	Yes	Yes	Laparoscopic surgery	Non-general anesthesia	＜270min	＜100ml	No	No	Yes	Yes	No	Yes	≥30g/L	＜30g/L	Cardiovascular surgery	＜36℃	＜40	No	No	No	No	Internal validation set
715	Female	≥65	≥3	＜25kg/m2	Yes	Yes	Yes	No	No	Yes	No	Open surgery	Non-general anesthesia	＜270min	＜100ml	No	No	Yes	Yes	No	Yes	＜30g/L	＜30g/L	Cardiovascular surgery	≥36℃	≥40	Yes	Yes	Yes	No	Internal validation set
716	Male	≥65	＜3	＜25kg/m2	Yes	Yes	Yes	No	No	No	No	Open surgery	General anesthesia	≥270min	≥100ml	No	Yes	Yes	Yes	No	Yes	＜30g/L	＜30g/L	Orthopedic surgery	≥36℃	≥40	No	No	Yes	No	Internal validation set
717	Male	≥65	＜3	≥25kg/m2	Yes	No	Yes	No	No	Yes	No	Open surgery	General anesthesia	＜270min	≥100ml	No	Yes	No	No	No	Yes	≥30g/L	＜30g/L	Gastrointestinal surgery	≥36℃	≥40	No	Yes	No	No	Internal validation set
718	Male	≥65	＜3	＜25kg/m2	Yes	No	Yes	No	No	No	No	Laparoscopic surgery	Non-general anesthesia	＜270min	≥100ml	No	Yes	No	No	No	No	＜30g/L	≥30g/L	Gastrointestinal surgery	≥36℃	＜40	Yes	No	Yes	No	Internal validation set
719	Male	≥65	≥3	＜25kg/m2	Yes	No	Yes	No	No	No	No	Laparoscopic surgery	Non-general anesthesia	≥270min	＜100ml	No	No	No	No	No	Yes	＜30g/L	≥30g/L	Gastrointestinal surgery	＜36℃	≥40	No	No	No	No	Internal validation set
720	Female	≥65	≥3	＜25kg/m2	Yes	No	Yes	No	Yes	No	No	Laparoscopic surgery	Non-general anesthesia	＜270min	＜100ml	No	No	No	No	No	Yes	＜30g/L	≥30g/L	Urological surgery	≥36℃	＜40	No	No	Yes	No	Internal validation set
721	Male	≥65	＜3	＜25kg/m2	No	No	No	No	No	No	No	Laparoscopic surgery	Non-general anesthesia	＜270min	＜100ml	No	No	No	Yes	No	No	≥30g/L	＜30g/L	Gastrointestinal surgery	＜36℃	≥40	Yes	No	No	No	Internal validation set
722	Male	≥65	≥3	＜25kg/m2	No	No	Yes	Yes	No	No	No	Laparoscopic surgery	Non-general anesthesia	＜270min	＜100ml	No	No	Yes	No	No	Yes	＜30g/L	≥30g/L	Gastrointestinal surgery	≥36℃	＜40	Yes	No	Yes	No	Internal validation set
723	Male	＜65	≥3	＜25kg/m2	No	Yes	Yes	Yes	No	Yes	Yes	Open surgery	Non-general anesthesia	＜270min	＜100ml	No	No	Yes	No	Yes	No	＜30g/L	＜30g/L	Urological surgery	≥36℃	≥40	Yes	Yes	No	No	Internal validation set
724	Female	＜65	＜3	≥25kg/m2	No	No	Yes	Yes	No	No	Yes	Open surgery	General anesthesia	＜270min	＜100ml	No	Yes	Yes	No	Yes	No	≥30g/L	＜30g/L	Gastrointestinal surgery	≥36℃	＜40	Yes	No	Yes	No	Internal validation set
725	Female	＜65	≥3	≥25kg/m2	Yes	Yes	No	No	No	Yes	No	Open surgery	General anesthesia	＜270min	＜100ml	No	Yes	Yes	Yes	No	Yes	＜30g/L	≥30g/L	Orthopedic surgery	≥36℃	＜40	No	Yes	Yes	No	Internal validation set
726	Female	＜65	≥3	＜25kg/m2	No	No	No	No	Yes	No	No	Open surgery	Non-general anesthesia	＜270min	＜100ml	No	Yes	No	Yes	Yes	No	＜30g/L	＜30g/L	Gastrointestinal surgery	＜36℃	≥40	Yes	Yes	No	No	Internal validation set
727	Male	≥65	＜3	≥25kg/m2	No	No	Yes	No	No	No	No	Open surgery	Non-general anesthesia	＜270min	≥100ml	No	No	No	Yes	Yes	Yes	＜30g/L	≥30g/L	Cardiovascular surgery	＜36℃	＜40	Yes	Yes	Yes	No	Internal validation set
728	Male	≥65	≥3	≥25kg/m2	No	No	No	No	No	No	No	Laparoscopic surgery	Non-general anesthesia	≥270min	＜100ml	No	No	No	No	No	No	＜30g/L	≥30g/L	Gastrointestinal surgery	≥36℃	≥40	No	No	Yes	No	Internal validation set
729	Male	＜65	＜3	≥25kg/m2	No	No	No	Yes	No	Yes	No	Laparoscopic surgery	Non-general anesthesia	≥270min	≥100ml	No	No	Yes	No	Yes	No	＜30g/L	≥30g/L	Cardiovascular surgery	≥36℃	＜40	No	Yes	No	No	Internal validation set
730	Male	≥65	＜3	≥25kg/m2	No	No	No	No	No	Yes	No	Laparoscopic surgery	Non-general anesthesia	＜270min	＜100ml	No	No	Yes	No	No	No	＜30g/L	≥30g/L	Orthopedic surgery	＜36℃	≥40	No	Yes	Yes	No	Internal validation set
731	Male	≥65	≥3	≥25kg/m2	No	No	No	No	No	Yes	No	Laparoscopic surgery	Non-general anesthesia	＜270min	＜100ml	No	Yes	No	No	No	No	＜30g/L	＜30g/L	Gastrointestinal surgery	≥36℃	＜40	Yes	No	Yes	No	Internal validation set
732	Female	＜65	≥3	＜25kg/m2	No	No	No	No	No	No	No	Open surgery	Non-general anesthesia	＜270min	＜100ml	No	No	Yes	Yes	No	No	≥30g/L	＜30g/L	Orthopedic surgery	＜36℃	＜40	Yes	No	No	No	Internal validation set
733	Female	≥65	＜3	＜25kg/m2	Yes	No	No	Yes	No	No	Yes	Laparoscopic surgery	Non-general anesthesia	≥270min	＜100ml	No	No	No	Yes	Yes	Yes	＜30g/L	＜30g/L	Orthopedic surgery	≥36℃	＜40	No	No	Yes	No	Internal validation set
734	Female	≥65	＜3	＜25kg/m2	No	No	No	Yes	No	No	Yes	Laparoscopic surgery	Non-general anesthesia	≥270min	≥100ml	No	No	No	Yes	Yes	No	≥30g/L	≥30g/L	Gastrointestinal surgery	＜36℃	＜40	No	No	Yes	No	Internal validation set
735	Male	≥65	≥3	≥25kg/m2	No	No	No	Yes	Yes	No	No	Laparoscopic surgery	Non-general anesthesia	≥270min	≥100ml	No	Yes	Yes	No	No	No	＜30g/L	≥30g/L	Gastrointestinal surgery	＜36℃	＜40	Yes	No	No	No	Internal validation set
736	Male	＜65	≥3	＜25kg/m2	No	No	Yes	No	Yes	Yes	Yes	Open surgery	Non-general anesthesia	＜270min	≥100ml	No	Yes	No	No	Yes	Yes	≥30g/L	＜30g/L	Orthopedic surgery	≥36℃	≥40	Yes	No	Yes	No	Internal validation set
737	Male	≥65	＜3	＜25kg/m2	Yes	No	Yes	No	No	No	No	Open surgery	Non-general anesthesia	＜270min	＜100ml	No	No	Yes	No	No	Yes	≥30g/L	＜30g/L	Other surgery	＜36℃	≥40	Yes	Yes	Yes	No	Internal validation set
738	Female	≥65	＜3	＜25kg/m2	No	No	Yes	No	No	No	No	Laparoscopic surgery	Non-general anesthesia	＜270min	＜100ml	No	No	No	No	No	No	＜30g/L	＜30g/L	Orthopedic surgery	＜36℃	＜40	No	No	No	No	Internal validation set
739	Male	≥65	＜3	＜25kg/m2	No	No	No	No	No	No	No	Laparoscopic surgery	Non-general anesthesia	＜270min	＜100ml	No	Yes	No	No	Yes	Yes	≥30g/L	≥30g/L	Orthopedic surgery	≥36℃	≥40	Yes	Yes	Yes	No	Internal validation set
740	Male	≥65	＜3	＜25kg/m2	No	No	No	Yes	No	No	No	Laparoscopic surgery	Non-general anesthesia	≥270min	≥100ml	No	Yes	No	Yes	Yes	No	≥30g/L	≥30g/L	Other surgery	≥36℃	＜40	Yes	No	No	No	Internal validation set
741	Female	≥65	＜3	＜25kg/m2	No	No	No	Yes	No	No	No	Laparoscopic surgery	Non-general anesthesia	＜270min	＜100ml	No	No	Yes	Yes	No	No	＜30g/L	≥30g/L	Gastrointestinal surgery	≥36℃	＜40	Yes	Yes	No	No	Internal validation set
742	Male	≥65	＜3	＜25kg/m2	No	No	No	Yes	No	No	No	Laparoscopic surgery	Non-general anesthesia	＜270min	＜100ml	No	Yes	Yes	Yes	Yes	No	≥30g/L	＜30g/L	Gastrointestinal surgery	≥36℃	≥40	No	No	Yes	No	Internal validation set
743	Female	≥65	＜3	＜25kg/m2	No	No	No	No	No	No	No	Open surgery	Non-general anesthesia	＜270min	＜100ml	No	Yes	Yes	No	Yes	No	＜30g/L	≥30g/L	Gastrointestinal surgery	＜36℃	＜40	Yes	Yes	No	No	Internal validation set
744	Male	≥65	＜3	≥25kg/m2	Yes	No	No	No	No	No	No	Open surgery	Non-general anesthesia	＜270min	＜100ml	No	No	Yes	No	No	No	≥30g/L	＜30g/L	Cardiovascular surgery	＜36℃	＜40	No	Yes	No	No	Internal validation set
745	Female	≥65	＜3	≥25kg/m2	No	No	No	No	No	No	No	Open surgery	Non-general anesthesia	＜270min	＜100ml	No	No	Yes	No	No	No	＜30g/L	≥30g/L	Other surgery	＜36℃	≥40	Yes	Yes	No	No	Internal validation set
746	Male	≥65	≥3	≥25kg/m2	No	No	Yes	No	No	No	No	Open surgery	Non-general anesthesia	＜270min	＜100ml	No	No	No	No	No	No	＜30g/L	≥30g/L	Orthopedic surgery	＜36℃	≥40	Yes	Yes	Yes	No	Internal validation set
747	Male	≥65	≥3	≥25kg/m2	No	No	No	No	No	No	No	Open surgery	Non-general anesthesia	＜270min	＜100ml	No	Yes	No	Yes	No	Yes	≥30g/L	＜30g/L	Orthopedic surgery	≥36℃	≥40	No	Yes	Yes	No	Internal validation set
748	Female	≥65	≥3	＜25kg/m2	No	No	No	Yes	No	No	No	Laparoscopic surgery	Non-general anesthesia	≥270min	＜100ml	No	Yes	No	No	No	Yes	≥30g/L	＜30g/L	Other surgery	≥36℃	＜40	No	Yes	No	No	Internal validation set
749	Male	≥65	＜3	＜25kg/m2	No	No	Yes	Yes	No	No	No	Laparoscopic surgery	Non-general anesthesia	＜270min	≥100ml	No	Yes	No	No	No	Yes	＜30g/L	＜30g/L	Gastrointestinal surgery	≥36℃	＜40	No	No	No	No	Internal validation set
750	Male	≥65	＜3	＜25kg/m2	No	Yes	No	Yes	No	No	No	Laparoscopic surgery	Non-general anesthesia	＜270min	＜100ml	No	Yes	No	No	No	Yes	＜30g/L	≥30g/L	Cardiovascular surgery	≥36℃	＜40	No	Yes	No	No	Internal validation set
751	Female	≥65	＜3	≥25kg/m2	No	Yes	No	No	Yes	No	No	Laparoscopic surgery	Non-general anesthesia	＜270min	≥100ml	No	No	Yes	Yes	No	No	＜30g/L	＜30g/L	Orthopedic surgery	≥36℃	＜40	Yes	No	Yes	No	Internal validation set
752	Female	≥65	＜3	≥25kg/m2	No	No	Yes	No	No	No	No	Open surgery	Non-general anesthesia	≥270min	＜100ml	No	No	Yes	Yes	No	Yes	＜30g/L	＜30g/L	Cardiovascular surgery	≥36℃	≥40	No	No	No	No	Internal validation set
753	Female	≥65	＜3	≥25kg/m2	No	Yes	No	No	No	No	No	Open surgery	Non-general anesthesia	＜270min	＜100ml	No	No	Yes	No	No	Yes	≥30g/L	＜30g/L	Gastrointestinal surgery	＜36℃	≥40	No	Yes	No	No	Internal validation set
754	Male	＜65	＜3	＜25kg/m2	Yes	No	No	No	No	No	No	Open surgery	Non-general anesthesia	＜270min	＜100ml	No	No	Yes	No	No	No	≥30g/L	≥30g/L	Urological surgery	＜36℃	＜40	No	No	No	No	Internal validation set
755	Female	＜65	＜3	＜25kg/m2	Yes	No	No	Yes	No	No	No	Laparoscopic surgery	Non-general anesthesia	＜270min	＜100ml	No	Yes	No	Yes	Yes	Yes	＜30g/L	≥30g/L	Orthopedic surgery	＜36℃	≥40	No	No	No	No	Internal validation set
756	Male	＜65	＜3	＜25kg/m2	Yes	No	No	No	No	No	No	Open surgery	Non-general anesthesia	＜270min	≥100ml	No	Yes	Yes	Yes	Yes	Yes	＜30g/L	≥30g/L	Other surgery	≥36℃	≥40	No	No	Yes	No	Internal validation set
757	Male	＜65	＜3	＜25kg/m2	No	No	No	No	No	No	Yes	Open surgery	Non-general anesthesia	＜270min	≥100ml	No	No	No	No	No	No	＜30g/L	≥30g/L	Gastrointestinal surgery	≥36℃	≥40	Yes	No	Yes	No	Internal validation set
758	Male	＜65	＜3	＜25kg/m2	No	Yes	No	No	No	No	No	Laparoscopic surgery	Non-general anesthesia	＜270min	≥100ml	No	Yes	No	Yes	No	No	＜30g/L	＜30g/L	Other surgery	≥36℃	≥40	Yes	No	No	No	Internal validation set
759	Female	＜65	＜3	＜25kg/m2	No	No	No	Yes	No	Yes	Yes	Laparoscopic surgery	Non-general anesthesia	≥270min	＜100ml	No	Yes	Yes	Yes	No	No	＜30g/L	≥30g/L	Orthopedic surgery	＜36℃	≥40	Yes	No	Yes	No	Internal validation set
760	Female	＜65	＜3	＜25kg/m2	No	No	No	Yes	No	Yes	No	Laparoscopic surgery	General anesthesia	＜270min	＜100ml	No	No	Yes	No	No	Yes	≥30g/L	≥30g/L	Other surgery	≥36℃	＜40	Yes	Yes	No	No	Internal validation set
761	Female	＜65	＜3	＜25kg/m2	No	No	Yes	Yes	No	Yes	No	Laparoscopic surgery	General anesthesia	＜270min	＜100ml	No	No	Yes	No	Yes	No	＜30g/L	＜30g/L	Urological surgery	≥36℃	≥40	Yes	Yes	No	No	Internal validation set
762	Male	＜65	＜3	≥25kg/m2	No	No	No	No	No	No	No	Laparoscopic surgery	General anesthesia	＜270min	＜100ml	No	Yes	Yes	No	No	Yes	≥30g/L	＜30g/L	Gastrointestinal surgery	＜36℃	≥40	Yes	No	Yes	No	Internal validation set
763	Male	＜65	≥3	≥25kg/m2	No	Yes	No	No	Yes	No	No	Open surgery	Non-general anesthesia	＜270min	＜100ml	No	No	Yes	Yes	No	Yes	≥30g/L	≥30g/L	Gastrointestinal surgery	＜36℃	＜40	No	Yes	Yes	No	Internal validation set
764	Male	＜65	≥3	≥25kg/m2	No	No	No	No	No	No	No	Open surgery	Non-general anesthesia	＜270min	＜100ml	No	No	Yes	Yes	No	Yes	≥30g/L	≥30g/L	Orthopedic surgery	≥36℃	≥40	Yes	Yes	Yes	No	Internal validation set
765	Female	＜65	＜3	＜25kg/m2	No	No	No	No	No	No	No	Open surgery	Non-general anesthesia	＜270min	＜100ml	No	Yes	Yes	Yes	Yes	Yes	＜30g/L	＜30g/L	Other surgery	≥36℃	≥40	No	No	Yes	No	Internal validation set
766	Female	＜65	≥3	＜25kg/m2	No	No	Yes	Yes	No	Yes	No	Open surgery	Non-general anesthesia	＜270min	＜100ml	No	Yes	No	Yes	Yes	Yes	≥30g/L	≥30g/L	Other surgery	＜36℃	＜40	Yes	No	Yes	No	Internal validation set
767	Female	＜65	＜3	＜25kg/m2	No	No	No	Yes	No	No	No	Open surgery	General anesthesia	≥270min	＜100ml	No	No	No	No	No	No	＜30g/L	≥30g/L	Gastrointestinal surgery	≥36℃	＜40	No	No	No	No	Internal validation set
768	Female	＜65	＜3	≥25kg/m2	No	No	No	Yes	No	No	Yes	Laparoscopic surgery	General anesthesia	≥270min	＜100ml	No	Yes	No	No	No	Yes	＜30g/L	＜30g/L	Urological surgery	≥36℃	＜40	Yes	No	No	No	Internal validation set
769	Female	＜65	＜3	≥25kg/m2	No	No	No	No	Yes	No	Yes	Laparoscopic surgery	Non-general anesthesia	≥270min	＜100ml	No	Yes	Yes	No	No	No	＜30g/L	≥30g/L	Orthopedic surgery	≥36℃	＜40	Yes	Yes	No	No	Internal validation set
770	Female	＜65	＜3	≥25kg/m2	No	No	No	No	No	Yes	No	Laparoscopic surgery	Non-general anesthesia	＜270min	＜100ml	No	No	No	No	No	Yes	＜30g/L	≥30g/L	Orthopedic surgery	≥36℃	≥40	Yes	No	Yes	No	Internal validation set
771	Female	＜65	＜3	＜25kg/m2	Yes	Yes	No	No	No	Yes	No	Laparoscopic surgery	Non-general anesthesia	＜270min	＜100ml	Yes	No	No	Yes	No	Yes	＜30g/L	＜30g/L	Cardiovascular surgery	＜36℃	＜40	No	Yes	Yes	No	Internal validation set
772	Male	＜65	＜3	＜25kg/m2	No	Yes	No	No	No	Yes	No	Open surgery	Non-general anesthesia	＜270min	≥100ml	No	Yes	No	Yes	No	No	≥30g/L	＜30g/L	Gastrointestinal surgery	≥36℃	＜40	No	Yes	No	No	Internal validation set
773	Male	＜65	＜3	＜25kg/m2	No	No	No	No	Yes	No	No	Open surgery	Non-general anesthesia	＜270min	＜100ml	No	Yes	Yes	No	No	Yes	≥30g/L	≥30g/L	Gastrointestinal surgery	＜36℃	＜40	Yes	No	No	No	Internal validation set
774	Female	＜65	≥3	＜25kg/m2	No	No	No	No	No	No	No	Open surgery	Non-general anesthesia	≥270min	≥100ml	Yes	Yes	Yes	Yes	No	Yes	≥30g/L	＜30g/L	Gastrointestinal surgery	＜36℃	≥40	No	No	Yes	No	Internal validation set
775	Male	＜65	＜3	≥25kg/m2	Yes	No	No	No	No	No	No	Laparoscopic surgery	Non-general anesthesia	＜270min	＜100ml	No	No	No	Yes	Yes	No	≥30g/L	＜30g/L	Gastrointestinal surgery	＜36℃	≥40	Yes	Yes	No	No	Internal validation set
776	Female	＜65	≥3	≥25kg/m2	Yes	No	No	No	No	No	No	Laparoscopic surgery	Non-general anesthesia	＜270min	＜100ml	No	No	No	No	No	Yes	≥30g/L	≥30g/L	Cardiovascular surgery	＜36℃	≥40	Yes	Yes	Yes	No	Internal validation set
777	Female	＜65	＜3	≥25kg/m2	Yes	No	Yes	No	No	Yes	No	Laparoscopic surgery	Non-general anesthesia	＜270min	＜100ml	No	No	Yes	No	No	No	＜30g/L	≥30g/L	Gastrointestinal surgery	＜36℃	≥40	No	Yes	Yes	No	Internal validation set
778	Female	＜65	＜3	＜25kg/m2	Yes	No	Yes	Yes	No	Yes	Yes	Laparoscopic surgery	Non-general anesthesia	＜270min	＜100ml	No	Yes	Yes	Yes	No	No	＜30g/L	＜30g/L	Cardiovascular surgery	≥36℃	＜40	No	No	Yes	No	Internal validation set
779	Female	＜65	＜3	＜25kg/m2	No	Yes	No	Yes	Yes	Yes	Yes	Laparoscopic surgery	General anesthesia	＜270min	≥100ml	No	No	No	No	Yes	Yes	＜30g/L	＜30g/L	Orthopedic surgery	＜36℃	＜40	No	Yes	No	No	Internal validation set
780	Female	＜65	＜3	＜25kg/m2	No	No	No	Yes	No	No	No	Open surgery	Non-general anesthesia	＜270min	≥100ml	No	No	No	No	No	Yes	≥30g/L	＜30g/L	Gastrointestinal surgery	≥36℃	＜40	Yes	No	No	No	Internal validation set
781	Male	＜65	＜3	＜25kg/m2	No	Yes	No	No	No	No	Yes	Open surgery	Non-general anesthesia	＜270min	≥100ml	Yes	No	No	Yes	Yes	No	≥30g/L	＜30g/L	Gastrointestinal surgery	＜36℃	＜40	No	No	No	No	Internal validation set
782	Female	＜65	＜3	＜25kg/m2	No	No	No	No	No	No	No	Open surgery	General anesthesia	≥270min	＜100ml	No	No	Yes	Yes	Yes	Yes	≥30g/L	≥30g/L	Cardiovascular surgery	＜36℃	＜40	No	Yes	Yes	No	Internal validation set
783	Female	＜65	＜3	＜25kg/m2	No	No	No	No	No	No	No	Open surgery	Non-general anesthesia	＜270min	＜100ml	No	No	Yes	No	No	Yes	≥30g/L	≥30g/L	Cardiovascular surgery	＜36℃	＜40	Yes	No	Yes	No	Internal validation set
784	Male	＜65	＜3	＜25kg/m2	Yes	No	Yes	No	No	No	No	Open surgery	Non-general anesthesia	＜270min	＜100ml	Yes	Yes	No	Yes	Yes	No	＜30g/L	≥30g/L	Gastrointestinal surgery	＜36℃	＜40	Yes	No	Yes	No	Internal validation set
785	Female	＜65	＜3	＜25kg/m2	No	No	Yes	Yes	No	Yes	No	Laparoscopic surgery	Non-general anesthesia	＜270min	＜100ml	Yes	Yes	Yes	Yes	Yes	Yes	＜30g/L	≥30g/L	Cardiovascular surgery	＜36℃	≥40	Yes	No	Yes	No	Internal validation set
786	Female	＜65	＜3	＜25kg/m2	No	No	No	No	No	No	No	Laparoscopic surgery	Non-general anesthesia	≥270min	＜100ml	No	No	Yes	No	Yes	No	＜30g/L	＜30g/L	Urological surgery	≥36℃	≥40	No	Yes	No	No	Internal validation set
787	Female	＜65	≥3	≥25kg/m2	No	Yes	No	No	No	Yes	No	Laparoscopic surgery	Non-general anesthesia	＜270min	＜100ml	No	Yes	No	No	No	No	＜30g/L	≥30g/L	Other surgery	＜36℃	＜40	No	Yes	Yes	No	Internal validation set
788	Female	＜65	≥3	≥25kg/m2	No	Yes	No	No	Yes	No	No	Laparoscopic surgery	Non-general anesthesia	＜270min	＜100ml	No	Yes	No	Yes	Yes	Yes	＜30g/L	＜30g/L	Gastrointestinal surgery	＜36℃	≥40	Yes	Yes	Yes	No	Internal validation set
789	Female	＜65	＜3	≥25kg/m2	No	No	Yes	Yes	Yes	No	No	Laparoscopic surgery	General anesthesia	＜270min	＜100ml	No	No	No	Yes	Yes	Yes	≥30g/L	＜30g/L	Other surgery	＜36℃	＜40	Yes	Yes	Yes	No	Internal validation set
790	Female	＜65	≥3	＜25kg/m2	No	Yes	No	Yes	No	No	No	Laparoscopic surgery	Non-general anesthesia	＜270min	＜100ml	No	No	Yes	Yes	No	Yes	≥30g/L	≥30g/L	Gastrointestinal surgery	≥36℃	＜40	Yes	Yes	No	No	Internal validation set
791	Female	＜65	＜3	＜25kg/m2	Yes	No	No	Yes	No	No	No	Laparoscopic surgery	Non-general anesthesia	＜270min	＜100ml	No	No	No	No	Yes	Yes	≥30g/L	＜30g/L	Urological surgery	≥36℃	＜40	Yes	No	No	No	Internal validation set
792	Female	＜65	＜3	＜25kg/m2	Yes	No	No	No	No	No	No	Open surgery	General anesthesia	＜270min	＜100ml	No	Yes	No	No	No	Yes	＜30g/L	≥30g/L	Urological surgery	＜36℃	＜40	No	Yes	Yes	No	Internal validation set
793	Male	＜65	＜3	＜25kg/m2	Yes	No	No	No	No	Yes	No	Open surgery	Non-general anesthesia	≥270min	＜100ml	No	Yes	No	No	No	No	≥30g/L	＜30g/L	Cardiovascular surgery	＜36℃	＜40	No	No	Yes	No	Internal validation set
794	Male	＜65	≥3	＜25kg/m2	Yes	No	No	No	No	No	Yes	Laparoscopic surgery	Non-general anesthesia	＜270min	＜100ml	No	No	Yes	Yes	No	No	＜30g/L	＜30g/L	Other surgery	≥36℃	≥40	No	No	No	No	Internal validation set
795	Female	＜65	≥3	＜25kg/m2	No	Yes	No	No	No	No	Yes	Laparoscopic surgery	Non-general anesthesia	＜270min	≥100ml	No	Yes	No	No	No	Yes	＜30g/L	＜30g/L	Orthopedic surgery	≥36℃	＜40	Yes	Yes	No	No	Internal validation set
796	Female	＜65	＜3	≥25kg/m2	No	No	Yes	Yes	No	No	No	Laparoscopic surgery	Non-general anesthesia	＜270min	＜100ml	No	No	Yes	No	No	No	＜30g/L	＜30g/L	Urological surgery	＜36℃	≥40	No	Yes	Yes	No	Internal validation set
797	Female	＜65	≥3	≥25kg/m2	No	No	Yes	Yes	No	No	Yes	Laparoscopic surgery	Non-general anesthesia	＜270min	≥100ml	No	No	Yes	No	No	No	＜30g/L	≥30g/L	Orthopedic surgery	≥36℃	≥40	No	No	No	No	Internal validation set
798	Male	＜65	＜3	≥25kg/m2	No	No	No	Yes	No	No	Yes	Laparoscopic surgery	Non-general anesthesia	＜270min	＜100ml	No	No	No	No	Yes	Yes	＜30g/L	≥30g/L	Urological surgery	≥36℃	≥40	Yes	Yes	No	No	Internal validation set
799	Male	＜65	＜3	＜25kg/m2	No	No	No	No	No	No	No	Open surgery	Non-general anesthesia	＜270min	＜100ml	No	No	No	No	No	No	≥30g/L	＜30g/L	Cardiovascular surgery	＜36℃	＜40	Yes	No	Yes	No	Internal validation set
800	Male	＜65	＜3	＜25kg/m2	No	Yes	No	No	No	No	Yes	Open surgery	Non-general anesthesia	＜270min	＜100ml	Yes	No	No	Yes	No	No	＜30g/L	＜30g/L	Other surgery	＜36℃	＜40	No	No	No	No	Internal validation set
801	Female	＜65	＜3	≥25kg/m2	Yes	No	No	No	No	No	No	Open surgery	Non-general anesthesia	＜270min	＜100ml	Yes	Yes	No	Yes	Yes	No	≥30g/L	＜30g/L	Gastrointestinal surgery	≥36℃	＜40	Yes	No	No	No	Internal validation set
802	Female	＜65	≥3	≥25kg/m2	Yes	No	No	No	No	Yes	No	Open surgery	Non-general anesthesia	＜270min	≥100ml	No	Yes	No	No	Yes	No	＜30g/L	＜30g/L	Gastrointestinal surgery	＜36℃	≥40	No	Yes	Yes	No	Internal validation set
803	Female	＜65	＜3	＜25kg/m2	No	No	Yes	Yes	No	No	No	Open surgery	General anesthesia	＜270min	≥100ml	Yes	No	Yes	Yes	No	No	≥30g/L	≥30g/L	Urological surgery	＜36℃	≥40	Yes	No	No	No	Internal validation set
804	Female	＜65	＜3	＜25kg/m2	No	No	No	No	Yes	No	Yes	Laparoscopic surgery	Non-general anesthesia	＜270min	≥100ml	No	Yes	No	Yes	Yes	No	≥30g/L	≥30g/L	Orthopedic surgery	＜36℃	＜40	No	No	Yes	No	Internal validation set
805	Female	＜65	＜3	≥25kg/m2	No	No	Yes	Yes	No	Yes	Yes	Laparoscopic surgery	Non-general anesthesia	＜270min	＜100ml	No	No	Yes	No	No	No	≥30g/L	＜30g/L	Orthopedic surgery	≥36℃	≥40	Yes	No	No	No	Internal validation set
806	Female	＜65	＜3	≥25kg/m2	No	No	No	No	No	No	No	Laparoscopic surgery	General anesthesia	＜270min	＜100ml	No	No	Yes	No	No	Yes	≥30g/L	≥30g/L	Cardiovascular surgery	＜36℃	≥40	Yes	Yes	Yes	No	Internal validation set
807	Female	＜65	≥3	＜25kg/m2	No	No	No	No	No	No	Yes	Laparoscopic surgery	Non-general anesthesia	＜270min	＜100ml	Yes	Yes	No	No	No	Yes	≥30g/L	＜30g/L	Orthopedic surgery	＜36℃	＜40	No	Yes	Yes	No	Internal validation set
808	Female	＜65	＜3	＜25kg/m2	No	Yes	No	No	Yes	No	No	Open surgery	Non-general anesthesia	≥270min	＜100ml	Yes	No	No	Yes	Yes	Yes	＜30g/L	≥30g/L	Other surgery	＜36℃	＜40	No	No	No	No	Internal validation set
809	Female	＜65	≥3	＜25kg/m2	No	Yes	No	No	No	No	No	Open surgery	Non-general anesthesia	≥270min	≥100ml	No	Yes	No	Yes	Yes	No	≥30g/L	＜30g/L	Orthopedic surgery	≥36℃	≥40	No	No	Yes	No	Internal validation set
810	Female	＜65	＜3	≥25kg/m2	No	No	No	No	No	No	Yes	Open surgery	Non-general anesthesia	≥270min	＜100ml	Yes	No	Yes	No	No	Yes	≥30g/L	＜30g/L	Other surgery	≥36℃	＜40	No	No	No	No	Internal validation set
811	Female	＜65	＜3	≥25kg/m2	Yes	No	No	Yes	No	No	Yes	Laparoscopic surgery	Non-general anesthesia	＜270min	≥100ml	No	No	No	Yes	Yes	No	＜30g/L	≥30g/L	Urological surgery	≥36℃	≥40	Yes	No	Yes	No	Internal validation set
812	Female	＜65	≥3	≥25kg/m2	No	No	No	Yes	No	No	No	Laparoscopic surgery	Non-general anesthesia	＜270min	＜100ml	No	Yes	No	No	Yes	Yes	≥30g/L	＜30g/L	Other surgery	＜36℃	＜40	Yes	No	Yes	No	Internal validation set
813	Female	＜65	＜3	＜25kg/m2	No	No	No	No	No	Yes	Yes	Open surgery	Non-general anesthesia	＜270min	＜100ml	Yes	Yes	No	No	Yes	No	＜30g/L	≥30g/L	Gastrointestinal surgery	＜36℃	≥40	Yes	No	Yes	No	Internal validation set
814	Female	＜65	＜3	＜25kg/m2	Yes	No	Yes	Yes	Yes	Yes	Yes	Laparoscopic surgery	General anesthesia	＜270min	＜100ml	Yes	Yes	Yes	No	Yes	Yes	≥30g/L	≥30g/L	Gastrointestinal surgery	＜36℃	＜40	No	No	Yes	No	Internal validation set
815	Female	＜65	＜3	＜25kg/m2	Yes	No	Yes	No	No	No	No	Open surgery	Non-general anesthesia	≥270min	＜100ml	No	Yes	No	No	No	No	≥30g/L	＜30g/L	Other surgery	＜36℃	≥40	Yes	No	Yes	No	Internal validation set
816	Female	≥65	＜3	＜25kg/m2	Yes	Yes	No	No	No	No	No	Open surgery	Non-general anesthesia	＜270min	＜100ml	No	Yes	Yes	No	Yes	Yes	＜30g/L	＜30g/L	Gastrointestinal surgery	＜36℃	≥40	Yes	No	Yes	No	Internal validation set
817	Male	≥65	＜3	＜25kg/m2	Yes	No	No	Yes	No	No	No	Laparoscopic surgery	General anesthesia	＜270min	＜100ml	No	No	No	Yes	Yes	No	＜30g/L	＜30g/L	Orthopedic surgery	＜36℃	≥40	No	No	Yes	No	Internal validation set
818	Female	＜65	＜3	≥25kg/m2	No	Yes	No	No	No	No	No	Open surgery	Non-general anesthesia	＜270min	＜100ml	No	Yes	No	Yes	No	Yes	＜30g/L	＜30g/L	Urological surgery	＜36℃	≥40	Yes	No	No	No	Internal validation set
819	Male	≥65	＜3	≥25kg/m2	No	No	Yes	Yes	No	No	No	Laparoscopic surgery	Non-general anesthesia	＜270min	＜100ml	No	Yes	No	No	No	Yes	≥30g/L	≥30g/L	Cardiovascular surgery	≥36℃	＜40	No	No	Yes	No	Internal validation set
820	Female	≥65	≥3	＜25kg/m2	No	No	No	No	No	No	No	Open surgery	Non-general anesthesia	＜270min	＜100ml	Yes	No	No	Yes	No	No	≥30g/L	＜30g/L	Urological surgery	≥36℃	＜40	Yes	No	No	No	Internal validation set
821	Female	＜65	＜3	＜25kg/m2	No	No	No	No	No	No	No	Open surgery	Non-general anesthesia	＜270min	＜100ml	No	No	No	No	Yes	Yes	＜30g/L	≥30g/L	Other surgery	＜36℃	＜40	No	No	No	No	Internal validation set
822	Female	≥65	＜3	＜25kg/m2	Yes	No	No	No	No	No	No	Open surgery	General anesthesia	＜270min	＜100ml	Yes	Yes	Yes	No	No	No	＜30g/L	＜30g/L	Cardiovascular surgery	≥36℃	≥40	Yes	Yes	No	No	Internal validation set
823	Female	≥65	＜3	≥25kg/m2	No	No	No	No	Yes	No	No	Laparoscopic surgery	General anesthesia	≥270min	＜100ml	No	Yes	No	Yes	No	No	＜30g/L	＜30g/L	Cardiovascular surgery	≥36℃	≥40	Yes	No	No	No	Internal validation set
824	Female	≥65	＜3	≥25kg/m2	No	No	No	No	Yes	No	No	Laparoscopic surgery	General anesthesia	＜270min	＜100ml	No	Yes	Yes	No	No	Yes	≥30g/L	≥30g/L	Cardiovascular surgery	＜36℃	≥40	Yes	Yes	Yes	No	Internal validation set
825	Female	＜65	≥3	≥25kg/m2	No	No	No	Yes	No	Yes	No	Laparoscopic surgery	Non-general anesthesia	＜270min	≥100ml	No	Yes	Yes	Yes	No	No	≥30g/L	≥30g/L	Gastrointestinal surgery	＜36℃	＜40	Yes	No	Yes	No	Internal validation set
826	Female	≥65	＜3	＜25kg/m2	No	No	No	Yes	No	Yes	Yes	Laparoscopic surgery	Non-general anesthesia	＜270min	＜100ml	No	Yes	No	No	No	Yes	＜30g/L	≥30g/L	Gastrointestinal surgery	＜36℃	＜40	Yes	No	Yes	No	Internal validation set
827	Female	≥65	≥3	＜25kg/m2	No	No	Yes	No	No	No	Yes	Laparoscopic surgery	Non-general anesthesia	≥270min	≥100ml	No	No	No	No	Yes	Yes	＜30g/L	＜30g/L	Gastrointestinal surgery	≥36℃	≥40	Yes	No	Yes	No	Internal validation set
828	Male	≥65	＜3	＜25kg/m2	Yes	No	No	Yes	No	No	No	Open surgery	Non-general anesthesia	＜270min	＜100ml	No	No	No	Yes	Yes	Yes	≥30g/L	≥30g/L	Urological surgery	＜36℃	＜40	No	No	No	No	Internal validation set
829	Male	≥65	＜3	＜25kg/m2	Yes	No	No	No	No	No	No	Open surgery	Non-general anesthesia	＜270min	＜100ml	No	Yes	Yes	Yes	No	No	＜30g/L	≥30g/L	Orthopedic surgery	≥36℃	＜40	No	Yes	No	No	Internal validation set
830	Female	≥65	≥3	≥25kg/m2	Yes	No	Yes	No	No	No	No	Open surgery	Non-general anesthesia	＜270min	＜100ml	No	No	No	Yes	No	No	≥30g/L	≥30g/L	Urological surgery	≥36℃	≥40	No	No	Yes	No	Internal validation set
831	Female	≥65	＜3	≥25kg/m2	Yes	No	Yes	Yes	No	No	No	Open surgery	Non-general anesthesia	＜270min	＜100ml	Yes	No	Yes	Yes	Yes	No	＜30g/L	＜30g/L	Urological surgery	＜36℃	≥40	Yes	Yes	No	No	Internal validation set
832	Male	≥65	＜3	＜25kg/m2	Yes	No	Yes	Yes	No	Yes	Yes	Open surgery	Non-general anesthesia	＜270min	≥100ml	Yes	No	Yes	Yes	Yes	Yes	≥30g/L	≥30g/L	Urological surgery	≥36℃	≥40	Yes	Yes	No	No	Internal validation set
833	Female	≥65	＜3	＜25kg/m2	No	No	Yes	Yes	No	No	No	Laparoscopic surgery	Non-general anesthesia	＜270min	≥100ml	No	No	No	No	No	No	＜30g/L	＜30g/L	Gastrointestinal surgery	≥36℃	≥40	No	Yes	Yes	No	Internal validation set
834	Male	≥65	＜3	＜25kg/m2	No	No	No	No	No	Yes	No	Laparoscopic surgery	Non-general anesthesia	≥270min	≥100ml	No	Yes	No	Yes	No	No	＜30g/L	＜30g/L	Gastrointestinal surgery	≥36℃	＜40	No	No	Yes	No	Internal validation set
835	Female	≥65	＜3	≥25kg/m2	No	No	No	No	No	Yes	No	Laparoscopic surgery	Non-general anesthesia	＜270min	＜100ml	No	No	Yes	Yes	No	Yes	＜30g/L	≥30g/L	Orthopedic surgery	≥36℃	≥40	No	Yes	Yes	No	Internal validation set
836	Female	≥65	≥3	≥25kg/m2	No	No	No	No	No	Yes	Yes	Laparoscopic surgery	Non-general anesthesia	＜270min	＜100ml	No	Yes	Yes	No	No	Yes	≥30g/L	＜30g/L	Gastrointestinal surgery	≥36℃	≥40	No	Yes	No	No	Internal validation set
837	Female	≥65	＜3	≥25kg/m2	No	No	No	No	No	No	Yes	Open surgery	Non-general anesthesia	＜270min	≥100ml	No	Yes	No	No	Yes	Yes	≥30g/L	＜30g/L	Gastrointestinal surgery	≥36℃	＜40	Yes	No	No	No	Internal validation set
838	Male	≥65	≥3	≥25kg/m2	No	No	No	Yes	No	Yes	No	Laparoscopic surgery	Non-general anesthesia	＜270min	≥100ml	No	No	No	Yes	No	Yes	＜30g/L	＜30g/L	Gastrointestinal surgery	＜36℃	＜40	No	Yes	No	No	Internal validation set
839	Male	≥65	＜3	≥25kg/m2	Yes	No	No	No	Yes	Yes	No	Open surgery	Non-general anesthesia	＜270min	≥100ml	No	No	No	Yes	Yes	Yes	＜30g/L	＜30g/L	Gastrointestinal surgery	≥36℃	≥40	No	Yes	No	No	Internal validation set
840	Male	≥65	≥3	＜25kg/m2	Yes	No	Yes	No	No	No	No	Open surgery	Non-general anesthesia	＜270min	＜100ml	No	Yes	Yes	Yes	No	No	≥30g/L	≥30g/L	Orthopedic surgery	≥36℃	＜40	Yes	Yes	Yes	No	Internal validation set
841	Female	≥65	≥3	＜25kg/m2	No	No	No	Yes	No	Yes	No	Laparoscopic surgery	Non-general anesthesia	＜270min	＜100ml	Yes	No	Yes	Yes	No	No	＜30g/L	≥30g/L	Other surgery	≥36℃	＜40	Yes	Yes	No	No	Internal validation set
842	Female	≥65	≥3	＜25kg/m2	No	No	No	Yes	No	No	No	Laparoscopic surgery	Non-general anesthesia	＜270min	＜100ml	Yes	Yes	No	Yes	No	Yes	＜30g/L	＜30g/L	Other surgery	＜36℃	＜40	Yes	No	Yes	No	Internal validation set
843	Male	＜65	≥3	≥25kg/m2	No	No	Yes	Yes	No	Yes	No	Laparoscopic surgery	Non-general anesthesia	＜270min	≥100ml	No	Yes	No	No	No	Yes	＜30g/L	＜30g/L	Urological surgery	＜36℃	＜40	Yes	Yes	Yes	No	Internal validation set
844	Female	＜65	＜3	≥25kg/m2	No	No	No	Yes	No	Yes	No	Laparoscopic surgery	Non-general anesthesia	＜270min	＜100ml	Yes	No	No	No	Yes	No	≥30g/L	≥30g/L	Orthopedic surgery	≥36℃	≥40	No	No	No	No	Internal validation set
845	Male	＜65	＜3	≥25kg/m2	No	No	Yes	Yes	No	No	No	Laparoscopic surgery	Non-general anesthesia	＜270min	＜100ml	No	No	Yes	Yes	Yes	No	≥30g/L	≥30g/L	Other surgery	＜36℃	＜40	Yes	No	Yes	No	Internal validation set
846	Male	＜65	≥3	＜25kg/m2	No	No	Yes	Yes	No	Yes	Yes	Laparoscopic surgery	Non-general anesthesia	＜270min	≥100ml	No	No	Yes	No	Yes	No	≥30g/L	≥30g/L	Orthopedic surgery	≥36℃	≥40	Yes	No	No	No	Internal validation set
847	Male	＜65	≥3	＜25kg/m2	No	No	No	Yes	No	Yes	No	Laparoscopic surgery	Non-general anesthesia	＜270min	＜100ml	No	Yes	Yes	No	No	No	≥30g/L	≥30g/L	Other surgery	≥36℃	＜40	Yes	Yes	No	No	Internal validation set
848	Female	＜65	≥3	＜25kg/m2	No	No	No	No	No	Yes	No	Open surgery	Non-general anesthesia	＜270min	＜100ml	No	No	Yes	No	No	Yes	＜30g/L	≥30g/L	Orthopedic surgery	＜36℃	＜40	No	Yes	Yes	No	Internal validation set
849	Female	＜65	＜3	＜25kg/m2	Yes	No	No	Yes	No	Yes	No	Open surgery	Non-general anesthesia	＜270min	≥100ml	No	No	No	No	No	No	≥30g/L	≥30g/L	Other surgery	＜36℃	≥40	No	No	No	No	Internal validation set
850	Male	≥65	≥3	≥25kg/m2	Yes	Yes	Yes	Yes	Yes	No	Yes	Laparoscopic surgery	General anesthesia	≥270min	＜100ml	Yes	No	Yes	Yes	No	No	＜30g/L	＜30g/L	Other surgery	≥36℃	≥40	Yes	Yes	Yes	No	External validation set	1
851	Female	≥65	＜3	＜25kg/m2	No	Yes	No	No	Yes	Yes	Yes	Open surgery	Non-general anesthesia	≥270min	＜100ml	Yes	Yes	No	No	Yes	No	＜30g/L	＜30g/L	Urological surgery	≥36℃	＜40	Yes	No	Yes	Yes	External validation set	1
852	Male	≥65	＜3	＜25kg/m2	Yes	No	No	No	Yes	No	No	Open surgery	General anesthesia	≥270min	≥100ml	Yes	Yes	No	No	No	Yes	＜30g/L	＜30g/L	Orthopedic surgery	＜36℃	＜40	Yes	No	No	No	External validation set	1
853	Male	≥65	≥3	≥25kg/m2	Yes	Yes	Yes	No	Yes	Yes	Yes	Open surgery	General anesthesia	≥270min	≥100ml	Yes	No	Yes	Yes	No	No	≥30g/L	＜30g/L	Urological surgery	＜36℃	＜40	No	Yes	No	No	External validation set	1
854	Female	≥65	≥3	＜25kg/m2	No	Yes	Yes	No	Yes	Yes	Yes	Laparoscopic surgery	Non-general anesthesia	＜270min	≥100ml	Yes	No	Yes	Yes	Yes	No	≥30g/L	＜30g/L	Orthopedic surgery	≥36℃	≥40	No	No	Yes	No	External validation set	1
855	Female	≥65	＜3	＜25kg/m2	Yes	Yes	No	Yes	No	No	No	Open surgery	Non-general anesthesia	≥270min	≥100ml	No	No	No	No	Yes	Yes	＜30g/L	＜30g/L	Gastrointestinal surgery	≥36℃	≥40	Yes	Yes	No	No	External validation set	1
856	Male	≥65	＜3	＜25kg/m2	Yes	Yes	No	Yes	Yes	No	Yes	Open surgery	General anesthesia	≥270min	＜100ml	Yes	Yes	No	No	No	No	≥30g/L	＜30g/L	Gastrointestinal surgery	＜36℃	＜40	Yes	No	Yes	No	External validation set	1
857	Female	＜65	＜3	＜25kg/m2	No	Yes	No	No	Yes	Yes	Yes	Open surgery	General anesthesia	≥270min	＜100ml	Yes	Yes	Yes	No	No	Yes	＜30g/L	≥30g/L	Gastrointestinal surgery	＜36℃	＜40	Yes	No	No	Yes	External validation set	1
858	Female	≥65	≥3	≥25kg/m2	Yes	Yes	No	No	Yes	No	Yes	Laparoscopic surgery	Non-general anesthesia	＜270min	＜100ml	Yes	No	No	No	Yes	Yes	＜30g/L	≥30g/L	Other surgery	≥36℃	＜40	Yes	No	No	No	External validation set	1
859	Female	≥65	≥3	≥25kg/m2	Yes	Yes	Yes	No	Yes	No	Yes	Laparoscopic surgery	Non-general anesthesia	＜270min	＜100ml	No	No	No	No	No	Yes	＜30g/L	≥30g/L	Gastrointestinal surgery	≥36℃	＜40	Yes	No	Yes	Yes	External validation set	1
860	Female	≥65	＜3	＜25kg/m2	No	No	No	No	Yes	No	No	Open surgery	Non-general anesthesia	≥270min	＜100ml	Yes	No	No	No	No	No	≥30g/L	＜30g/L	Cardiovascular surgery	＜36℃	＜40	No	Yes	No	No	External validation set	1
861	Female	＜65	＜3	＜25kg/m2	Yes	Yes	No	Yes	Yes	No	No	Laparoscopic surgery	Non-general anesthesia	≥270min	＜100ml	Yes	No	No	No	No	Yes	＜30g/L	＜30g/L	Other surgery	≥36℃	≥40	No	Yes	Yes	Yes	External validation set	1
862	Female	≥65	＜3	＜25kg/m2	Yes	Yes	No	No	No	No	Yes	Open surgery	Non-general anesthesia	≥270min	＜100ml	No	No	No	No	No	No	＜30g/L	＜30g/L	Cardiovascular surgery	＜36℃	≥40	Yes	No	No	Yes	External validation set	1
863	Female	≥65	＜3	＜25kg/m2	Yes	No	Yes	No	No	No	No	Open surgery	Non-general anesthesia	＜270min	＜100ml	Yes	No	No	No	No	Yes	≥30g/L	≥30g/L	Orthopedic surgery	＜36℃	≥40	No	No	Yes	No	External validation set	1
864	Female	≥65	＜3	＜25kg/m2	Yes	No	No	No	Yes	No	Yes	Open surgery	Non-general anesthesia	≥270min	＜100ml	Yes	Yes	No	Yes	No	No	＜30g/L	＜30g/L	Gastrointestinal surgery	≥36℃	＜40	Yes	Yes	No	No	External validation set	1
865	Female	＜65	＜3	≥25kg/m2	Yes	No	No	No	No	Yes	Yes	Laparoscopic surgery	General anesthesia	≥270min	＜100ml	No	Yes	No	No	No	No	＜30g/L	≥30g/L	Urological surgery	≥36℃	＜40	Yes	Yes	Yes	Yes	External validation set	1
866	Female	≥65	≥3	＜25kg/m2	No	No	No	No	Yes	Yes	No	Laparoscopic surgery	General anesthesia	＜270min	＜100ml	No	No	No	No	No	No	≥30g/L	≥30g/L	Other surgery	≥36℃	≥40	Yes	No	No	Yes	Internal validation set	1
867	Male	≥65	≥3	＜25kg/m2	No	Yes	No	Yes	No	No	No	Open surgery	Non-general anesthesia	≥270min	＜100ml	Yes	No	Yes	Yes	No	Yes	≥30g/L	≥30g/L	Orthopedic surgery	≥36℃	≥40	Yes	No	Yes	Yes	Internal validation set	1
868	Male	≥65	＜3	＜25kg/m2	Yes	Yes	Yes	Yes	No	No	No	Open surgery	Non-general anesthesia	≥270min	≥100ml	Yes	Yes	Yes	Yes	No	No	＜30g/L	≥30g/L	Other surgery	＜36℃	＜40	No	Yes	No	No	Internal validation set	1
869	Female	≥65	＜3	＜25kg/m2	No	No	Yes	No	No	Yes	No	Laparoscopic surgery	General anesthesia	＜270min	≥100ml	No	Yes	No	No	Yes	Yes	≥30g/L	＜30g/L	Cardiovascular surgery	≥36℃	＜40	No	Yes	No	No	Internal validation set	1
870	Female	≥65	≥3	＜25kg/m2	No	No	No	Yes	No	No	No	Open surgery	General anesthesia	＜270min	＜100ml	No	No	No	No	Yes	No	＜30g/L	＜30g/L	Cardiovascular surgery	≥36℃	＜40	Yes	Yes	Yes	Yes	Internal validation set	1
871	Male	≥65	＜3	＜25kg/m2	Yes	Yes	No	No	Yes	No	Yes	Laparoscopic surgery	Non-general anesthesia	≥270min	＜100ml	Yes	Yes	No	Yes	No	No	＜30g/L	＜30g/L	Urological surgery	＜36℃	＜40	Yes	No	No	Yes	Internal validation set	1
872	Male	≥65	＜3	＜25kg/m2	Yes	Yes	No	No	Yes	No	Yes	Open surgery	Non-general anesthesia	≥270min	≥100ml	No	Yes	Yes	No	No	No	≥30g/L	＜30g/L	Gastrointestinal surgery	＜36℃	≥40	Yes	Yes	No	No	Internal validation set	1
873	Male	≥65	＜3	＜25kg/m2	No	No	Yes	No	No	No	No	Laparoscopic surgery	General anesthesia	＜270min	＜100ml	No	No	Yes	No	No	Yes	＜30g/L	≥30g/L	Orthopedic surgery	＜36℃	＜40	Yes	Yes	Yes	Yes	Internal validation set	1
874	Male	＜65	≥3	＜25kg/m2	No	No	Yes	Yes	No	Yes	No	Laparoscopic surgery	General anesthesia	≥270min	＜100ml	No	Yes	No	Yes	Yes	Yes	＜30g/L	≥30g/L	Gastrointestinal surgery	≥36℃	≥40	Yes	Yes	Yes	No	Internal validation set	1
875	Female	≥65	≥3	＜25kg/m2	No	No	Yes	Yes	Yes	Yes	No	Open surgery	Non-general anesthesia	≥270min	≥100ml	No	Yes	No	Yes	Yes	No	＜30g/L	＜30g/L	Gastrointestinal surgery	＜36℃	≥40	No	No	No	No	Internal validation set	1
876	Female	≥65	＜3	＜25kg/m2	Yes	Yes	Yes	No	No	No	Yes	Open surgery	Non-general anesthesia	＜270min	≥100ml	No	Yes	Yes	No	No	No	＜30g/L	≥30g/L	Gastrointestinal surgery	≥36℃	＜40	No	No	Yes	Yes	Internal validation set	1
877	Male	≥65	＜3	≥25kg/m2	Yes	No	Yes	No	No	Yes	No	Laparoscopic surgery	General anesthesia	＜270min	＜100ml	Yes	Yes	Yes	No	No	Yes	≥30g/L	≥30g/L	Gastrointestinal surgery	≥36℃	＜40	No	No	Yes	No	Internal validation set	1
878	Female	≥65	＜3	≥25kg/m2	No	Yes	Yes	Yes	No	No	Yes	Laparoscopic surgery	General anesthesia	≥270min	＜100ml	No	No	No	No	No	Yes	≥30g/L	＜30g/L	Urological surgery	≥36℃	＜40	Yes	No	No	Yes	Internal validation set	1
879	Female	≥65	＜3	＜25kg/m2	No	No	No	No	No	No	No	Open surgery	Non-general anesthesia	＜270min	≥100ml	Yes	No	Yes	Yes	Yes	No	＜30g/L	＜30g/L	Other surgery	＜36℃	≥40	Yes	Yes	No	Yes	Internal validation set	1
880	Female	≥65	≥3	＜25kg/m2	No	No	No	Yes	No	Yes	Yes	Open surgery	General anesthesia	＜270min	＜100ml	Yes	No	Yes	Yes	Yes	No	≥30g/L	≥30g/L	Other surgery	＜36℃	≥40	No	Yes	No	No	Internal validation set	1
881	Female	≥65	≥3	≥25kg/m2	No	No	No	Yes	No	Yes	No	Laparoscopic surgery	General anesthesia	＜270min	＜100ml	Yes	Yes	No	No	Yes	Yes	≥30g/L	＜30g/L	Other surgery	＜36℃	≥40	No	Yes	No	Yes	Internal validation set	1
882	Female	≥65	＜3	＜25kg/m2	Yes	Yes	No	No	No	No	No	Laparoscopic surgery	General anesthesia	＜270min	≥100ml	No	Yes	No	No	No	Yes	≥30g/L	≥30g/L	Orthopedic surgery	≥36℃	≥40	No	Yes	Yes	Yes	Internal validation set	1
883	Female	≥65	＜3	＜25kg/m2	No	Yes	Yes	No	No	No	Yes	Laparoscopic surgery	Non-general anesthesia	≥270min	≥100ml	No	No	No	Yes	No	Yes	≥30g/L	≥30g/L	Gastrointestinal surgery	＜36℃	＜40	No	No	No	No	Internal validation set	1
884	Male	＜65	＜3	＜25kg/m2	No	No	Yes	Yes	No	Yes	No	Open surgery	Non-general anesthesia	＜270min	＜100ml	Yes	Yes	Yes	Yes	Yes	No	≥30g/L	≥30g/L	Gastrointestinal surgery	＜36℃	＜40	No	Yes	No	No	Internal validation set	1
885	Male	＜65	≥3	＜25kg/m2	No	Yes	No	Yes	No	No	No	Laparoscopic surgery	Non-general anesthesia	＜270min	＜100ml	No	Yes	Yes	Yes	No	No	＜30g/L	≥30g/L	Orthopedic surgery	＜36℃	＜40	No	No	Yes	No	Internal validation set	1
886	Female	≥65	≥3	≥25kg/m2	Yes	Yes	No	No	No	No	No	Open surgery	General anesthesia	≥270min	≥100ml	No	No	Yes	Yes	No	No	＜30g/L	≥30g/L	Cardiovascular surgery	＜36℃	≥40	No	Yes	No	No	Internal validation set	1
887	Female	≥65	＜3	＜25kg/m2	Yes	No	Yes	No	No	Yes	Yes	Laparoscopic surgery	Non-general anesthesia	＜270min	≥100ml	No	No	No	No	No	Yes	≥30g/L	≥30g/L	Other surgery	≥36℃	＜40	Yes	Yes	No	No	Internal validation set	1
888	Female	＜65	＜3	＜25kg/m2	Yes	No	Yes	Yes	Yes	Yes	Yes	Laparoscopic surgery	Non-general anesthesia	＜270min	＜100ml	Yes	Yes	No	No	No	No	＜30g/L	＜30g/L	Gastrointestinal surgery	≥36℃	＜40	Yes	No	Yes	No	Internal validation set	1
889	Male	≥65	≥3	＜25kg/m2	No	Yes	No	Yes	No	No	No	Open surgery	Non-general anesthesia	≥270min	＜100ml	No	Yes	No	Yes	No	No	≥30g/L	＜30g/L	Other surgery	≥36℃	≥40	No	Yes	No	No	Internal validation set	1
890	Male	≥65	≥3	≥25kg/m2	Yes	No	No	No	No	No	No	Open surgery	Non-general anesthesia	＜270min	≥100ml	No	No	Yes	Yes	No	Yes	≥30g/L	＜30g/L	Other surgery	≥36℃	≥40	Yes	No	No	No	Internal validation set	1
891	Female	≥65	≥3	≥25kg/m2	No	No	Yes	No	No	Yes	No	Open surgery	Non-general anesthesia	＜270min	＜100ml	Yes	Yes	Yes	No	No	Yes	＜30g/L	≥30g/L	Orthopedic surgery	＜36℃	＜40	No	No	Yes	Yes	Internal validation set	1
892	Female	＜65	＜3	＜25kg/m2	No	No	Yes	Yes	No	No	No	Laparoscopic surgery	Non-general anesthesia	＜270min	＜100ml	No	No	No	No	Yes	No	＜30g/L	≥30g/L	Orthopedic surgery	＜36℃	＜40	Yes	No	No	Yes	Internal validation set	1
893	Female	＜65	＜3	＜25kg/m2	Yes	Yes	No	Yes	No	No	No	Open surgery	Non-general anesthesia	≥270min	≥100ml	No	No	No	Yes	Yes	No	＜30g/L	≥30g/L	Cardiovascular surgery	≥36℃	＜40	No	Yes	Yes	Yes	Internal validation set	1
894	Male	＜65	≥3	＜25kg/m2	Yes	Yes	No	Yes	No	No	Yes	Open surgery	Non-general anesthesia	＜270min	≥100ml	No	Yes	Yes	Yes	No	No	＜30g/L	＜30g/L	Orthopedic surgery	＜36℃	≥40	Yes	No	No	No	Internal validation set	1
895	Male	≥65	＜3	≥25kg/m2	No	No	Yes	No	No	Yes	Yes	Laparoscopic surgery	General anesthesia	＜270min	＜100ml	Yes	Yes	No	No	No	Yes	≥30g/L	≥30g/L	Orthopedic surgery	≥36℃	≥40	Yes	No	Yes	No	Internal validation set	1
896	Male	≥65	＜3	≥25kg/m2	No	No	Yes	No	No	Yes	No	Open surgery	General anesthesia	≥270min	＜100ml	No	No	No	No	No	No	≥30g/L	≥30g/L	Gastrointestinal surgery	＜36℃	≥40	Yes	Yes	No	Yes	Internal validation set	1
897	Male	≥65	＜3	≥25kg/m2	Yes	No	No	Yes	No	Yes	No	Open surgery	Non-general anesthesia	≥270min	≥100ml	No	Yes	Yes	No	No	Yes	＜30g/L	＜30g/L	Other surgery	＜36℃	＜40	No	Yes	Yes	Yes	Internal validation set	1
898	Female	＜65	＜3	＜25kg/m2	Yes	No	No	Yes	No	No	Yes	Laparoscopic surgery	General anesthesia	＜270min	＜100ml	Yes	Yes	Yes	Yes	No	Yes	≥30g/L	≥30g/L	Gastrointestinal surgery	≥36℃	≥40	No	Yes	Yes	Yes	Internal validation set	1
899	Female	≥65	＜3	＜25kg/m2	No	No	No	Yes	No	No	No	Open surgery	Non-general anesthesia	＜270min	＜100ml	Yes	No	Yes	Yes	No	No	＜30g/L	≥30g/L	Orthopedic surgery	＜36℃	≥40	Yes	Yes	No	No	Internal validation set	1
900	Male	＜65	＜3	＜25kg/m2	No	No	No	No	No	No	No	Open surgery	Non-general anesthesia	≥270min	≥100ml	No	No	No	Yes	No	Yes	≥30g/L	≥30g/L	Orthopedic surgery	＜36℃	≥40	Yes	No	No	No	Internal validation set	1
901	Male	≥65	≥3	≥25kg/m2	Yes	No	No	Yes	Yes	Yes	No	Open surgery	General anesthesia	＜270min	≥100ml	No	Yes	No	No	No	Yes	≥30g/L	＜30g/L	Urological surgery	＜36℃	＜40	Yes	No	Yes	No	Internal validation set	1
902	Female	≥65	≥3	≥25kg/m2	Yes	No	Yes	No	No	No	No	Laparoscopic surgery	General anesthesia	＜270min	＜100ml	Yes	No	No	No	Yes	Yes	＜30g/L	＜30g/L	Gastrointestinal surgery	＜36℃	≥40	Yes	No	No	Yes	Internal validation set	1
903	Female	≥65	≥3	＜25kg/m2	No	No	No	No	No	No	Yes	Laparoscopic surgery	Non-general anesthesia	≥270min	＜100ml	Yes	No	Yes	No	Yes	No	＜30g/L	≥30g/L	Other surgery	＜36℃	＜40	No	No	No	No	Internal validation set	1
904	Female	＜65	＜3	＜25kg/m2	No	No	No	No	No	No	Yes	Open surgery	Non-general anesthesia	≥270min	≥100ml	No	Yes	Yes	No	No	Yes	＜30g/L	＜30g/L	Gastrointestinal surgery	≥36℃	＜40	Yes	No	No	No	Internal validation set	1
905	Male	＜65	＜3	≥25kg/m2	Yes	No	Yes	Yes	No	Yes	No	Open surgery	Non-general anesthesia	＜270min	＜100ml	Yes	Yes	No	No	No	Yes	≥30g/L	＜30g/L	Gastrointestinal surgery	＜36℃	≥40	Yes	No	Yes	Yes	Internal validation set	1
906	Male	≥65	≥3	≥25kg/m2	Yes	Yes	Yes	Yes	No	No	No	Laparoscopic surgery	General anesthesia	＜270min	＜100ml	Yes	No	No	No	No	Yes	≥30g/L	≥30g/L	Urological surgery	≥36℃	≥40	No	Yes	No	Yes	Internal validation set	1
907	Female	＜65	≥3	≥25kg/m2	Yes	No	No	Yes	No	No	No	Open surgery	General anesthesia	＜270min	≥100ml	No	No	No	No	No	Yes	＜30g/L	＜30g/L	Other surgery	＜36℃	≥40	Yes	No	Yes	Yes	Internal validation set	1
908	Female	≥65	＜3	＜25kg/m2	Yes	No	No	Yes	No	No	No	Laparoscopic surgery	Non-general anesthesia	≥270min	＜100ml	No	Yes	No	No	Yes	No	＜30g/L	≥30g/L	Gastrointestinal surgery	＜36℃	≥40	Yes	Yes	Yes	Yes	Internal validation set	1
909	Female	≥65	＜3	＜25kg/m2	Yes	No	No	No	No	No	No	Open surgery	General anesthesia	＜270min	＜100ml	No	Yes	No	No	Yes	Yes	＜30g/L	≥30g/L	Orthopedic surgery	≥36℃	＜40	Yes	Yes	No	Yes	Internal validation set	1
910	Male	＜65	≥3	≥25kg/m2	Yes	No	No	No	Yes	No	Yes	Open surgery	General anesthesia	＜270min	≥100ml	No	Yes	No	No	No	No	＜30g/L	＜30g/L	Other surgery	＜36℃	＜40	No	Yes	No	No	Internal validation set	1
911	Male	≥65	≥3	≥25kg/m2	No	Yes	Yes	No	No	Yes	Yes	Open surgery	Non-general anesthesia	＜270min	≥100ml	No	No	No	Yes	No	Yes	＜30g/L	≥30g/L	Other surgery	≥36℃	≥40	No	No	No	Yes	Internal validation set	1
912	Male	≥65	＜3	≥25kg/m2	No	Yes	Yes	No	No	Yes	No	Open surgery	General anesthesia	≥270min	＜100ml	No	No	No	Yes	No	Yes	＜30g/L	≥30g/L	Orthopedic surgery	＜36℃	≥40	No	No	No	Yes	Internal validation set	1
913	Female	≥65	＜3	＜25kg/m2	Yes	No	No	No	No	No	No	Open surgery	General anesthesia	≥270min	＜100ml	No	No	No	No	No	No	＜30g/L	≥30g/L	Gastrointestinal surgery	＜36℃	≥40	Yes	Yes	No	Yes	Internal validation set	1
914	Male	≥65	≥3	＜25kg/m2	Yes	Yes	No	No	No	No	No	Laparoscopic surgery	Non-general anesthesia	＜270min	＜100ml	Yes	No	No	No	No	Yes	＜30g/L	＜30g/L	Orthopedic surgery	≥36℃	＜40	Yes	Yes	No	No	Internal validation set	1
915	Male	＜65	≥3	＜25kg/m2	Yes	Yes	No	No	No	No	Yes	Open surgery	Non-general anesthesia	＜270min	≥100ml	No	No	No	No	No	No	≥30g/L	＜30g/L	Orthopedic surgery	＜36℃	≥40	No	No	Yes	Yes	Internal validation set	1
916	Male	＜65	＜3	≥25kg/m2	No	No	Yes	No	No	No	Yes	Laparoscopic surgery	Non-general anesthesia	＜270min	≥100ml	No	No	No	Yes	No	No	＜30g/L	≥30g/L	Gastrointestinal surgery	＜36℃	≥40	No	Yes	No	Yes	Internal validation set	1
917	Male	＜65	≥3	≥25kg/m2	Yes	No	No	No	Yes	Yes	No	Laparoscopic surgery	General anesthesia	＜270min	＜100ml	Yes	No	Yes	Yes	No	Yes	＜30g/L	＜30g/L	Other surgery	＜36℃	＜40	No	No	Yes	Yes	Internal validation set	1
918	Male	≥65	≥3	＜25kg/m2	Yes	Yes	No	No	No	No	No	Open surgery	General anesthesia	＜270min	＜100ml	Yes	No	No	Yes	No	Yes	≥30g/L	≥30g/L	Orthopedic surgery	＜36℃	＜40	No	No	No	No	Internal validation set	1
919	Female	＜65	≥3	≥25kg/m2	No	Yes	Yes	No	No	No	Yes	Open surgery	Non-general anesthesia	＜270min	≥100ml	Yes	No	No	No	Yes	No	＜30g/L	＜30g/L	Other surgery	≥36℃	≥40	Yes	No	No	No	Internal validation set	1
920	Female	≥65	＜3	≥25kg/m2	No	No	Yes	No	No	No	Yes	Laparoscopic surgery	Non-general anesthesia	＜270min	≥100ml	No	No	No	No	No	No	≥30g/L	＜30g/L	Orthopedic surgery	＜36℃	≥40	No	No	No	Yes	Internal validation set	1
921	Female	＜65	＜3	≥25kg/m2	No	No	No	No	No	Yes	Yes	Laparoscopic surgery	General anesthesia	≥270min	≥100ml	No	No	No	No	No	Yes	＜30g/L	＜30g/L	Gastrointestinal surgery	≥36℃	≥40	No	No	Yes	Yes	Internal validation set	1
922	Female	≥65	＜3	＜25kg/m2	No	No	No	Yes	Yes	Yes	No	Open surgery	General anesthesia	≥270min	≥100ml	No	No	No	Yes	No	Yes	≥30g/L	≥30g/L	Gastrointestinal surgery	＜36℃	＜40	Yes	No	Yes	Yes	Internal validation set	1
923	Male	≥65	≥3	＜25kg/m2	No	No	Yes	No	No	No	No	Laparoscopic surgery	Non-general anesthesia	＜270min	＜100ml	Yes	No	Yes	Yes	No	Yes	≥30g/L	＜30g/L	Orthopedic surgery	＜36℃	≥40	No	Yes	No	No	Internal validation set	1
924	Male	≥65	≥3	≥25kg/m2	No	No	No	No	No	No	No	Laparoscopic surgery	General anesthesia	＜270min	＜100ml	No	No	Yes	No	No	Yes	≥30g/L	＜30g/L	Urological surgery	≥36℃	≥40	Yes	Yes	No	Yes	Internal validation set	1
925	Female	≥65	＜3	≥25kg/m2	No	No	No	No	No	No	Yes	Open surgery	Non-general anesthesia	＜270min	＜100ml	No	No	No	No	Yes	Yes	≥30g/L	＜30g/L	Urological surgery	≥36℃	＜40	No	No	Yes	No	Internal validation set	1
926	Female	＜65	＜3	＜25kg/m2	No	No	Yes	Yes	No	Yes	No	Laparoscopic surgery	Non-general anesthesia	≥270min	≥100ml	Yes	No	No	Yes	Yes	No	≥30g/L	＜30g/L	Gastrointestinal surgery	≥36℃	＜40	Yes	No	No	No	Internal validation set	1
927	Male	≥65	≥3	＜25kg/m2	No	No	Yes	Yes	No	Yes	No	Laparoscopic surgery	Non-general anesthesia	＜270min	＜100ml	Yes	No	No	Yes	Yes	No	≥30g/L	≥30g/L	Cardiovascular surgery	＜36℃	＜40	Yes	Yes	Yes	Yes	Internal validation set	1
928	Male	≥65	≥3	≥25kg/m2	No	No	No	No	No	No	No	Open surgery	General anesthesia	＜270min	＜100ml	No	No	Yes	No	No	Yes	≥30g/L	＜30g/L	Cardiovascular surgery	＜36℃	≥40	Yes	No	Yes	Yes	Internal validation set	1
929	Female	≥65	＜3	≥25kg/m2	No	No	No	No	No	No	Yes	Open surgery	General anesthesia	≥270min	≥100ml	No	No	Yes	No	No	Yes	≥30g/L	≥30g/L	Orthopedic surgery	＜36℃	≥40	No	No	Yes	No	Internal validation set	1
930	Female	≥65	＜3	＜25kg/m2	No	No	Yes	No	No	No	No	Open surgery	Non-general anesthesia	＜270min	＜100ml	Yes	No	No	No	Yes	No	＜30g/L	≥30g/L	Gastrointestinal surgery	≥36℃	≥40	No	Yes	No	Yes	Internal validation set	1
931	Male	＜65	≥3	＜25kg/m2	No	No	Yes	Yes	Yes	Yes	No	Open surgery	Non-general anesthesia	＜270min	＜100ml	No	No	Yes	Yes	Yes	Yes	＜30g/L	＜30g/L	Gastrointestinal surgery	＜36℃	≥40	No	No	No	No	Internal validation set	1
932	Male	＜65	＜3	＜25kg/m2	No	No	No	No	No	Yes	No	Open surgery	General anesthesia	＜270min	≥100ml	No	No	Yes	No	No	No	＜30g/L	≥30g/L	Gastrointestinal surgery	＜36℃	≥40	No	Yes	Yes	No	Internal validation set	1
933	Female	≥65	＜3	≥25kg/m2	No	No	No	No	No	No	No	Laparoscopic surgery	General anesthesia	＜270min	≥100ml	Yes	Yes	No	No	No	Yes	≥30g/L	＜30g/L	Cardiovascular surgery	＜36℃	＜40	Yes	No	Yes	Yes	Internal validation set	1
934	Female	＜65	＜3	≥25kg/m2	No	No	No	No	Yes	No	No	Laparoscopic surgery	Non-general anesthesia	≥270min	＜100ml	Yes	Yes	No	No	No	Yes	≥30g/L	＜30g/L	Urological surgery	＜36℃	＜40	Yes	Yes	Yes	Yes	Internal validation set	1
935	Male	≥65	＜3	＜25kg/m2	No	No	No	Yes	No	Yes	No	Open surgery	Non-general anesthesia	＜270min	＜100ml	No	No	Yes	No	No	Yes	≥30g/L	＜30g/L	Orthopedic surgery	＜36℃	＜40	Yes	Yes	Yes	Yes	Internal validation set	1
936	Male	≥65	＜3	＜25kg/m2	No	No	No	No	No	Yes	No	Open surgery	Non-general anesthesia	＜270min	≥100ml	No	No	Yes	No	No	Yes	＜30g/L	＜30g/L	Gastrointestinal surgery	≥36℃	＜40	No	Yes	No	Yes	Internal validation set	1
937	Female	＜65	＜3	＜25kg/m2	No	No	No	No	Yes	No	No	Open surgery	General anesthesia	≥270min	＜100ml	No	No	No	No	No	Yes	≥30g/L	＜30g/L	Cardiovascular surgery	≥36℃	＜40	No	Yes	No	Yes	Internal validation set	1
938	Male	≥65	＜3	≥25kg/m2	No	No	No	No	No	No	No	Laparoscopic surgery	Non-general anesthesia	≥270min	＜100ml	Yes	No	Yes	No	Yes	Yes	＜30g/L	＜30g/L	Orthopedic surgery	＜36℃	＜40	Yes	No	Yes	Yes	Internal validation set	1
939	Male	≥65	＜3	≥25kg/m2	No	No	No	No	No	No	No	Open surgery	Non-general anesthesia	＜270min	＜100ml	No	Yes	No	No	Yes	No	＜30g/L	＜30g/L	Other surgery	＜36℃	≥40	No	Yes	Yes	Yes	Internal validation set	1
940	Male	≥65	＜3	≥25kg/m2	No	No	No	Yes	No	Yes	No	Open surgery	General anesthesia	＜270min	≥100ml	No	No	No	Yes	No	No	≥30g/L	＜30g/L	Orthopedic surgery	＜36℃	＜40	Yes	No	Yes	No	Internal validation set	1
941	Male	≥65	＜3	＜25kg/m2	No	No	No	Yes	No	Yes	No	Open surgery	Non-general anesthesia	＜270min	≥100ml	No	No	No	Yes	Yes	No	≥30g/L	≥30g/L	Urological surgery	≥36℃	≥40	Yes	Yes	No	Yes	Internal validation set	1
942	Male	≥65	＜3	＜25kg/m2	No	No	No	No	Yes	No	No	Open surgery	Non-general anesthesia	≥270min	＜100ml	No	Yes	No	No	Yes	No	＜30g/L	≥30g/L	Urological surgery	≥36℃	＜40	No	No	No	Yes	Internal validation set	1
943	Female	≥65	＜3	＜25kg/m2	No	No	No	Yes	No	No	No	Open surgery	Non-general anesthesia	≥270min	≥100ml	No	No	No	No	No	Yes	≥30g/L	≥30g/L	Orthopedic surgery	＜36℃	≥40	Yes	Yes	No	Yes	Internal validation set	1
944	Male	≥65	＜3	≥25kg/m2	No	No	No	No	No	No	No	Open surgery	Non-general anesthesia	＜270min	＜100ml	No	No	No	No	No	No	＜30g/L	＜30g/L	Other surgery	＜36℃	≥40	Yes	No	No	Yes	Internal validation set	1
945	Male	＜65	≥3	≥25kg/m2	No	No	No	No	No	Yes	No	Open surgery	Non-general anesthesia	＜270min	＜100ml	No	Yes	Yes	No	Yes	No	≥30g/L	≥30g/L	Cardiovascular surgery	＜36℃	≥40	No	No	No	Yes	Internal validation set	1
946	Male	＜65	≥3	＜25kg/m2	No	No	No	Yes	No	Yes	No	Open surgery	General anesthesia	＜270min	≥100ml	No	Yes	No	No	Yes	No	≥30g/L	＜30g/L	Gastrointestinal surgery	＜36℃	＜40	No	Yes	Yes	No	Internal validation set	1
947	Male	≥65	＜3	≥25kg/m2	No	No	Yes	Yes	No	Yes	No	Laparoscopic surgery	General anesthesia	＜270min	＜100ml	No	No	No	No	Yes	Yes	＜30g/L	＜30g/L	Gastrointestinal surgery	≥36℃	＜40	Yes	Yes	No	No	Internal validation set	1
948	Male	≥65	＜3	≥25kg/m2	No	No	No	No	No	No	No	Open surgery	Non-general anesthesia	＜270min	≥100ml	No	No	Yes	No	No	No	＜30g/L	≥30g/L	Orthopedic surgery	＜36℃	＜40	Yes	No	No	No	Internal validation set	1
949	Female	＜65	＜3	＜25kg/m2	No	No	No	No	No	No	No	Open surgery	Non-general anesthesia	＜270min	≥100ml	No	Yes	Yes	No	No	Yes	＜30g/L	＜30g/L	Gastrointestinal surgery	＜36℃	≥40	No	No	Yes	No	Internal validation set	1
950	Female	≥65	≥3	＜25kg/m2	No	No	No	Yes	No	No	No	Open surgery	Non-general anesthesia	＜270min	＜100ml	No	Yes	No	No	Yes	No	≥30g/L	＜30g/L	Gastrointestinal surgery	≥36℃	＜40	No	Yes	No	No	Internal validation set	1
